# Supplementary material for: Neural activity in cortico-basal ganglia circuits of juvenile songbirds encodes performance during goal-directed learning
Source: eLife journal article supplement (doi:10.7554/elife.26973), 2017-12-19
Supplement: supp [file elife-26973-supp-v1.zip]

Archive with 9 entries (9 files):
- elife_poa_e26973_Transparent_Reporting_File.docx
- elife_poa_e26973_Figure_3_source_data_1.xlsx
- elife_poa_e26973_Figure_2_figure_supplement_1.pdf
- elife_poa_e26973_Figure_2_figure_supplement_2.pdf
- elife_poa_e26973_Figure_1_figure_supplement_2.pdf
- elife_poa_e26973_Figure_10_figure_supplement_1.pdf
- elife_poa_e26973_Figure_1_figure_supplement_1.pdf
- elife_poa_e26973_Figure_1_figure_supplement_3.pdf
- elife_poa_e26973_Figure_7_figure_supplement_1.pdf
