# Supplementary material for: Neural activity in cortico-basal ganglia circuits of juvenile songbirds encodes performance during goal-directed learning
Source: eLife journal article supplement (doi:10.7554/elife.26973), 2017-12-19

**Figure 1 Supplement 2.**

Distinct populations of neurons in LMAN-SHELL respond to either tutor song or self-generated song (own song).

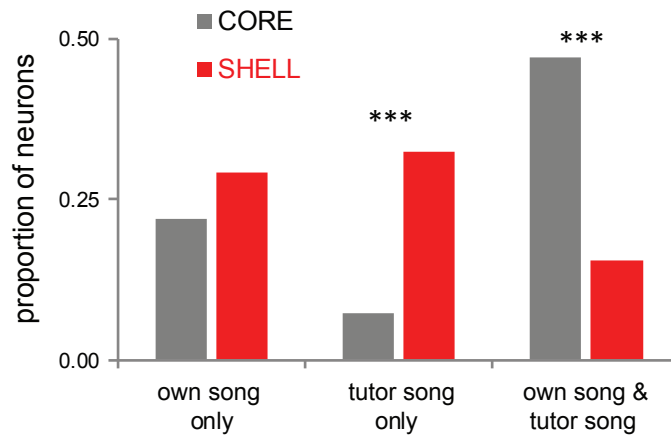

Supplement: supp [file elife-26973-supp-v1.zip › elife_poa_e26973_Figure_1_figure_supplement_2.pdf]
