# Supplementary material for: Neural activity in cortico-basal ganglia circuits of juvenile songbirds encodes performance during goal-directed learning
Source: eLife journal article supplement (doi:10.7554/elife.26973), 2017-12-19

**Figure 2-supplement 1.** Spike bursts increased in excited but not suppressed neurons during singing.

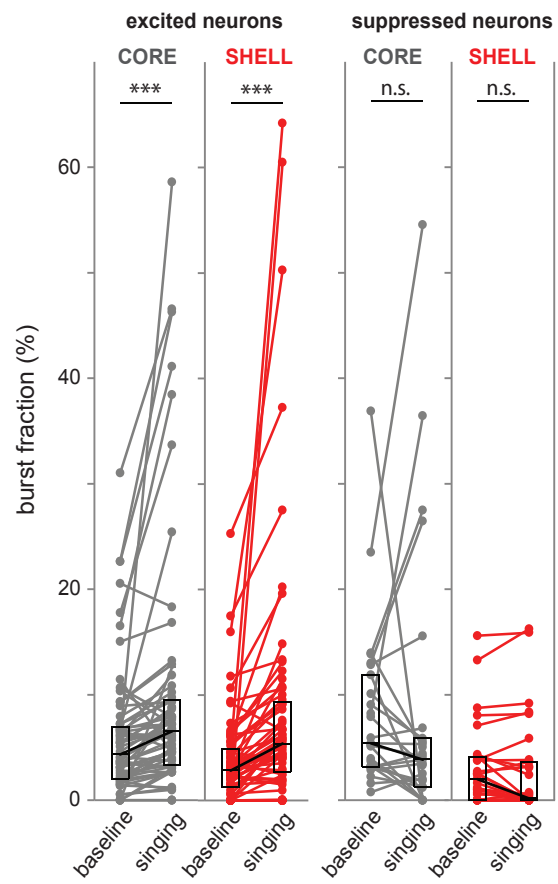

Supplement: supp [file elife-26973-supp-v1.zip › elife_poa_e26973_Figure_2_figure_supplement_1.pdf]
