# Supplementary material for: Neural activity in cortico-basal ganglia circuits of juvenile songbirds encodes performance during goal-directed learning
Source: eLife journal article supplement (doi:10.7554/elife.26973), 2017-12-19
Supplement: supp [file elife-26973-supp-v1.zip › elife_poa_e26973_Figure_3_source_data_1.xlsx]

## Sheet: CORE neurons
Time (ms)	Neuron 1	Neuron 2	Neuron 3	Neuron 4	Neuron 5	Neuron 6	Neuron 7	Neuron 8	Neuron 9	Neuron 10	Neuron 11	Neuron 12	Neuron 13	Neuron 14	Neuron 15	Neuron 16	Neuron 17	Neuron 18	Neuron 19	Neuron 20	Neuron 21	Neuron 22	Neuron 23	Neuron 24	Neuron 25	Neuron 26	Neuron 27	Neuron 28	Neuron 29	Neuron 30	Neuron 31	Neuron 32	Neuron 33	Neuron 34	Neuron 35	Neuron 36	Neuron 37	Neuron 38	Neuron 39	Neuron 40	Neuron 41	Neuron 42	Neuron 43	Neuron 44	Neuron 45	Neuron 46	Neuron 47	Neuron 48	Neuron 49
-200	0.219226	1.53744	0.882345	-0.359622	1.46325	-1.83774	-2.32995	-0.0844435	-0.917124	-0.744646	0.0369863	-0.986309	-0.853142	-0.813938	-0.686191	-0.833527	3.58424	-1.36196	1.9259	-1.81068	0.202909	1.69314	-3.56715	-0.514522	-0.31656	-0.291612	0.757756	-0.419847	0.89428	0.190706	-1.06297	-0.608896	0.906376	-0.649529	-2.67347	0.147432	-1.34358	-1.05202	4.73226	1.32694	-0.190779	-0.443429	-0.963811	-0.36108	-0.0905404	2.53422	-0.0744578	1.51986	2.41179
-198	0.0952289	0.912741	0.735065	-0.304039	1.08071	-1.6722	-1.96077	-0.249536	-1.01787	-0.393227	0.162261	-0.907609	-0.708419	-0.568398	-0.649149	-0.646069	2.50691	-1.11469	1.57896	-1.52348	-0.198554	1.07379	-3.32606	-0.551221	-0.270474	-0.335195	0.552441	-0.42669	0.335071	0.175664	-0.801703	-0.490108	1.03634	-0.410989	-2.16	-0.00161028	-1.10981	-0.931592	3.69855	1.0343	-0.201839	-0.33737	-0.881313	-0.31013	-0.0627615	2.19397	-0.0652447	1.24709	2.30212
-196	-0.00203307	0.343015	0.596115	-0.272176	0.734179	-1.53875	-1.53986	-0.318433	-1.09115	-0.0240377	0.246622	-0.8274	-0.564231	-0.353295	-0.589286	-0.441563	1.54618	-0.864902	1.23524	-1.18773	-0.495108	0.582272	-3.10114	-0.574093	-0.229494	-0.388615	0.368432	-0.437965	-0.144137	0.132354	-0.585427	-0.396165	1.18883	-0.225865	-1.6917	-0.147213	-0.911841	-0.812722	2.68816	0.723506	-0.226353	-0.241254	-0.810752	-0.25906	-0.0295033	1.94405	-0.0583615	0.98398	2.26919
-194	-0.0629289	-0.127589	0.480213	-0.25926	0.458046	-1.448	-1.0728	-0.272691	-1.12627	0.331998	0.284356	-0.741888	-0.405881	-0.181927	-0.508781	-0.234596	0.765324	-0.639167	0.91047	-0.812628	-0.666557	0.22987	-2.9019	-0.580706	-0.195972	-0.44924	0.209279	-0.450336	-0.505279	0.0735425	-0.439984	-0.333222	1.34604	-0.101793	-1.29311	-0.283017	-0.752689	-0.694959	1.76369	0.405713	-0.264991	-0.167233	-0.755992	-0.21187	0.00582822	1.80992	-0.0540895	0.745995	2.30991
-192	-0.0842507	-0.468737	0.397966	-0.255194	0.276939	-1.40205	-0.579478	-0.114854	-1.11415	0.643399	0.280153	-0.646515	-0.21908	-0.0609342	-0.414057	-0.0440931	0.192198	-0.466508	0.61852	-0.413642	-0.71955	-0.00146796	-2.72206	-0.571208	-0.170757	-0.512819	0.0723117	-0.458856	-0.734696	0.0227371	-0.376449	-0.299523	1.48665	-0.0319552	-0.975196	-0.40258	-0.628462	-0.579165	0.965023	0.0939806	-0.316522	-0.123172	-0.715584	-0.171404	0.0395477	1.79167	-0.0516298	0.543443	2.40455
-190	-0.0707108	-0.667005	0.352732	-0.248187	0.199008	-1.39358	-0.0967717	0.131129	-1.0482	0.883903	0.248309	-0.538077	0.00221677	0.0109362	-0.314698	0.110204	-0.183334	-0.370663	0.371063	-0.0116892	-0.683628	-0.147619	-2.53677	-0.547842	-0.153473	-0.573792	-0.0482459	-0.458306	-0.844669	0.00941751	-0.387872	-0.286389	1.59008	0.00230742	-0.737	-0.499328	-0.531826	-0.469108	0.300848	-0.196303	-0.377542	-0.109981	-0.682942	-0.138304	0.0684732	1.86367	-0.0493947	0.380358	2.52267
-188	-0.0346228	-0.724833	0.339702	-0.229034	0.21252	-1.40693	0.325912	0.425032	-0.92624	1.03662	0.2091	-0.416517	0.250264	0.0427814	-0.221486	0.21271	-0.401218	-0.362257	0.176855	0.369238	-0.599052	-0.244848	-2.3075	-0.513924	-0.143252	-0.625991	-0.15725	-0.444818	-0.866615	0.0606637	-0.452235	-0.281708	1.64048	0.0255015	-0.570182	-0.567375	-0.455573	-0.371123	-0.249413	-0.447891	-0.442279	-0.121167	-0.648749	-0.1106	0.0903534	1.98257	-0.0457233	0.255335	2.63247
-186	0.00663138	-0.65725	0.347674	-0.194226	0.287416	-1.42081	0.638434	0.718821	-0.753356	1.09571	0.183428	-0.285898	0.502838	0.0497905	-0.144224	0.25652	-0.515695	-0.434575	0.0404154	0.705454	-0.501109	-0.313714	-1.99473	-0.472856	-0.139472	-0.663714	-0.255826	-0.417012	-0.839017	0.191674	-0.540453	-0.274223	1.6295	0.0609729	-0.463692	-0.603103	-0.39478	-0.291813	-0.723113	-0.644012	-0.502696	-0.144872	-0.604743	-0.0842488	0.103866	2.09996	-0.0396726	0.163881	2.70978
-184	0.0350978	-0.488759	0.36282	-0.146602	0.382226	-1.41185	0.805092	0.96544	-0.544467	1.06587	0.187496	-0.154525	0.727916	0.0496427	-0.0900648	0.245296	-0.578149	-0.565406	-0.0394461	0.976902	-0.407216	-0.350873	-1.57471	-0.42762	-0.142064	-0.682932	-0.341178	-0.376155	-0.795195	0.398699	-0.625989	-0.256526	1.55738	0.125244	-0.406751	-0.606575	-0.347112	-0.235035	-1.15612	-0.772539	-0.549176	-0.167572	-0.547141	-0.0546058	0.108328	2.17488	-0.0314558	0.101329	2.74246
-182	0.0375112	-0.251557	0.372853	-0.0934364	0.45495	-1.35808	0.816846	1.12559	-0.324502	0.960196	0.229059	-0.0343598	0.892014	0.0576971	-0.0628903	0.19128	-0.62394	-0.724604	-0.0702772	1.16927	-0.312183	-0.331689	-1.05342	-0.380899	-0.15122	-0.682268	-0.408884	-0.325331	-0.755533	0.657452	-0.692018	-0.225423	1.43243	0.225068	-0.389829	-0.581634	-0.311945	-0.199871	-1.56635	-0.830554	-0.571903	-0.177962	-0.47799	-0.018387	0.103352	2.18125	-0.0222802	0.0650931	2.72896
-180	0.00938098	0.0157435	0.369897	-0.0430439	0.474702	-1.24174	0.695161	1.17167	-0.124627	0.797294	0.306114	0.0602926	0.969161	0.082447	-0.0639425	0.110158	-0.66684	-0.884284	-0.0650012	1.27439	-0.193689	-0.221932	-0.470427	-0.335516	-0.166706	-0.663349	-0.456181	-0.26819	-0.726214	0.928018	-0.733498	-0.179807	1.26914	0.357296	-0.404472	-0.534227	-0.289426	-0.180666	-1.94611	-0.826909	-0.562701	-0.169637	-0.403759	0.0246576	0.0886677	2.10871	-0.013668	0.0552545	2.67269
-178	-0.0439202	0.270813	0.351058	-0.00155816	0.430123	-1.05162	0.485886	1.08937	0.0253641	0.5977	0.407954	0.115057	0.947403	0.122952	-0.0934407	0.0151574	-0.701735	-1.02739	-0.0392017	1.28937	-0.0257887	0.00672058	0.110245	-0.294695	-0.187249	-0.630392	-0.48421	-0.207981	-0.703378	1.16458	-0.754062	-0.117657	1.085	0.510819	-0.442954	-0.469721	-0.280197	-0.168913	-2.26644	-0.780691	-0.516779	-0.141881	-0.332034	0.0711415	0.0642069	1.95839	-0.00663288	0.0731556	2.57644
-176	-0.109701	0.472994	0.316849	0.0287047	0.331449	-0.785661	0.246171	0.877967	0.10614	0.380145	0.517872	0.118711	0.830919	0.169323	-0.152423	-0.0868743	-0.713453	-1.1513	-0.00749632	1.21543	0.205231	0.363452	0.619263	-0.261732	-0.210367	-0.589153	-0.49797	-0.147301	-0.679538	1.32643	-0.760125	-0.0343319	0.896513	0.669576	-0.498124	-0.390901	-0.285685	-0.15585	-2.49077	-0.715325	-0.433793	-0.0987016	-0.268224	0.1149	0.0304403	1.7373	-0.00116069	0.118658	2.44052
-174	-0.173034	0.590569	0.268689	0.0488573	0.205573	-0.4543	0.0301426	0.55009	0.115644	0.158438	0.616631	0.066772	0.637515	0.206118	-0.243663	-0.195763	-0.687833	-1.2653	0.0195718	1.05756	0.489619	0.83143	1.00274	-0.23907	-0.232803	-0.545619	-0.504129	-0.0884251	-0.648873	1.38656	-0.755562	0.076341	0.715246	0.815792	-0.563307	-0.29814	-0.308248	-0.13461	-2.59131	-0.650501	-0.31794	-0.0468461	-0.214118	0.149043	-0.0112092	1.45513	0.00373534	0.187497	2.2654
-172	-0.222008	0.60721	0.207032	0.0616285	0.0862617	-0.083659	-0.121563	0.131243	0.0702558	-0.0598451	0.686057	-0.0357889	0.392883	0.217388	-0.370596	-0.314974	-0.620856	-1.38346	0.0368086	0.824939	0.792882	1.368	1.23572	-0.227119	-0.251358	-0.504904	-0.508208	-0.0337214	-0.609497	1.33589	-0.739444	0.218293	0.545181	0.932838	-0.631955	-0.191896	-0.350384	-0.101516	-2.56106	-0.595706	-0.17721	0.00637475	-0.168977	0.168346	-0.058159	1.12462	0.00942921	0.270298	2.05675
-170	-0.250824	0.524694	0.131236	0.0693261	0.00344656	0.283931	-0.186294	-0.341302	-0.000785122	-0.272174	0.712327	-0.174014	0.123911	0.191616	-0.533979	-0.447036	-0.522808	-1.5159	0.0433759	0.531625	1.06559	1.91017	1.3236	-0.223457	-0.263769	-0.470681	-0.512974	0.0143358	-0.562845	1.18307	-0.707212	0.388536	0.382717	1.00728	-0.697127	-0.0760109	-0.41276	-0.0567735	-2.41715	-0.548629	-0.0223041	0.0548134	-0.132302	0.17099	-0.106944	0.764217	0.01689	0.354072	1.82929
-168	-0.259694	0.360576	0.0412679	0.0726446	-0.0247735	0.594806	-0.159093	-0.820951	-0.0657544	-0.477842	0.688519	-0.325335	-0.146782	0.125025	-0.727428	-0.589633	-0.416335	-1.66202	0.0402887	0.196481	1.26038	2.38327	1.29357	-0.22293	-0.269282	-0.445224	-0.519016	0.0536681	-0.511733	0.951126	-0.653753	0.574211	0.219789	1.03	-0.751188	0.0404929	-0.4916	-0.00486849	-2.1957	-0.499139	0.134341	0.0944729	-0.106517	0.158964	-0.154052	0.399975	0.0261013	0.425721	1.60696
-166	-0.252305	0.141915	-0.0596733	0.0707339	0.00437973	0.794993	-0.0501766	-1.25632	-0.101339	-0.674339	0.615918	-0.464488	-0.403767	0.0224384	-0.934239	-0.73393	-0.329345	-1.80817	0.0279201	-0.158036	1.34879	2.71169	1.18222	-0.218817	-0.268739	-0.429791	-0.526955	0.0833145	-0.458864	0.672438	-0.576236	0.753452	0.0492729	0.996507	-0.786202	0.144724	-0.576639	0.0456162	-1.94177	-0.43648	0.279289	0.12373	-0.0979291	0.137141	-0.197039	0.0639828	0.0359844	0.475853	1.4194
-164	-0.232802	-0.102127	-0.163071	0.0622219	0.079034	0.844728	0.118132	-1.59818	-0.0995198	-0.855174	0.503582	-0.569557	-0.638943	-0.104305	-1.12809	-0.86566	-0.285346	-1.93045	0.00484125	-0.507768	1.3305	2.83165	1.02577	-0.204719	-0.264133	-0.424877	-0.539543	0.103884	-0.406602	0.382628	-0.475467	0.900443	-0.129419	0.907141	-0.795144	0.223949	-0.650906	0.0833935	-1.69876	-0.355639	0.398959	0.142951	-0.115336	0.111574	-0.235354	-0.211332	0.0448429	0.500879	1.29618
-162	-0.204106	-0.34592	-0.254845	0.046526	0.176025	0.73102	0.315307	-1.80806	-0.0678413	-1.01004	0.366106	-0.627207	-0.849542	-0.239737	-1.27866	-0.968516	-0.2946	-2.00095	-0.0316766	-0.828536	1.2315	2.70534	0.855407	-0.176447	-0.257799	-0.429913	-0.561841	0.117397	-0.357638	0.114103	-0.355973	0.992983	-0.307102	0.767442	-0.773541	0.270111	-0.693128	0.0973731	-1.50055	-0.259642	0.481033	0.153756	-0.166884	0.0877798	-0.270303	-0.401448	0.0510748	0.502177	1.26072
-160	-0.168277	-0.56956	-0.317553	0.0248764	0.265629	0.472655	0.508569	-1.86666	-0.0236052	-1.12677	0.220174	-0.635384	-1.03502	-0.368852	-1.36067	-1.02878	-0.349229	-1.99484	-0.0842249	-1.09718	1.09267	2.3338	0.696263	-0.133144	-0.251481	-0.442327	-0.598913	0.126515	-0.315557	-0.109751	-0.225705	1.01954	-0.46565	0.58878	-0.720762	0.282185	-0.682464	0.0803713	-1.36742	-0.157201	0.516497	0.158202	-0.256505	0.0695972	-0.303968	-0.497441	0.0537674	0.482822	1.32514
-158	-0.128112	-0.757907	-0.334689	0.000797056	0.317103	0.114905	0.671063	-1.77925	0.014732	-1.19357	0.0809565	-0.602634	-1.19406	-0.480681	-1.36242	-1.03972	-0.424169	-1.89526	-0.153971	-1.29239	0.954723	1.76441	0.566812	-0.0771801	-0.245587	-0.456463	-0.652114	0.133519	-0.284514	-0.278132	-0.0957598	0.982847	-0.582843	0.388554	-0.640084	0.265085	-0.604274	0.0321034	-1.30526	-0.0578439	0.501737	0.158089	-0.381394	0.0588181	-0.3375	-0.510019	0.0528793	0.443877	1.48677
-156	-0.0884377	-0.89822	-0.295828	-0.0199863	0.304733	-0.284234	0.790101	-1.57569	0.0348174	-1.20036	-0.0405265	-0.54443	-1.3229	-0.570233	-1.2898	-1.00417	-0.483868	-1.69512	-0.240115	-1.39641	0.84607	1.08888	0.477251	-0.0129598	-0.238958	-0.463256	-0.71612	0.139556	-0.268087	-0.392798	0.020487	0.898475	-0.639314	0.189126	-0.537173	0.226155	-0.454989	-0.0400441	-1.3067	0.0322395	0.439743	0.154469	-0.531474	0.0554468	-0.369639	-0.468033	0.0489599	0.382634	1.72708
-154	-0.0558062	-0.978701	-0.200863	-0.0302315	0.213664	-0.670677	0.871674	-1.30443	0.0334526	-1.13905	-0.138447	-0.477923	-1.41591	-0.638154	-1.16363	-0.934313	-0.492671	-1.39664	-0.33988	-1.39814	0.777538	0.428992	0.427907	0.0547556	-0.229288	-0.451482	-0.778597	0.144537	-0.268038	-0.464327	0.109737	0.789182	-0.624738	0.0150634	-0.417493	0.17175	-0.244345	-0.12301	-1.35316	0.111487	0.339762	0.14736	-0.691024	0.0582686	-0.396333	-0.411566	0.0426351	0.294016	2.01425
-152	-0.0364159	-0.98951	-0.0616134	-0.022528	0.0440293	-1.00711	0.938033	-1.02208	0.0151532	-1.00381	-0.211591	-0.416935	-1.46827	-0.688197	-1.01165	-0.848238	-0.425538	-1.01047	-0.448394	-1.29721	0.744108	-0.0886826	0.409868	0.122223	-0.214111	-0.410754	-0.823042	0.147724	-0.283782	-0.506167	0.16256	0.677416	-0.540917	-0.11101	-0.283953	0.106159	0.005873	-0.202082	-1.41756	0.181421	0.215487	0.135652	-0.841857	0.065407	-0.411821	-0.381523	0.0342125	0.174355	2.30965
-150	-0.0332541	-0.926227	0.100134	0.00877511	-0.188114	-1.27747	1.01791	-0.781835	-0.0117574	-0.792611	-0.261601	-0.368723	-1.47947	-0.723456	-0.858878	-0.764501	-0.275716	-0.555843	-0.558174	-1.10701	0.730672	-0.364268	0.408664	0.187258	-0.191968	-0.335373	-0.833688	0.148656	-0.31277	-0.528965	0.177064	0.579093	-0.400973	-0.17305	-0.136252	0.0332311	0.266265	-0.265331	-1.46841	0.243984	0.082572	0.117314	-0.966922	0.0746812	-0.410803	-0.40877	0.0236735	0.0252197	2.5775
-148	-0.044069	-0.793955	0.257924	0.0655337	-0.453608	-1.48255	1.13252	-0.623757	-0.0387178	-0.509891	-0.290671	-0.333137	-1.45529	-0.743041	-0.720896	-0.696442	-0.0570475	-0.0610343	-0.658588	-0.854794	0.71818	-0.35322	0.409488	0.248877	-0.163304	-0.227428	-0.800403	0.147924	-0.351342	-0.537446	0.16025	0.500775	-0.225558	-0.165546	0.0274705	-0.0408914	0.506114	-0.306738	-1.47589	0.299611	-0.0435615	0.0900404	-1.0531	0.0837431	-0.390709	-0.505945	0.0110571	-0.145031	2.79475
-146	-0.0614652	-0.609351	0.387668	0.144509	-0.715914	-1.63008	1.28296	-0.568724	-0.0583459	-0.169619	-0.299389	-0.303909	-1.40625	-0.740878	-0.602598	-0.648346	0.199613	0.437741	-0.736125	-0.577226	0.687888	-0.0818904	0.401185	0.306432	-0.130722	-0.0975472	-0.721627	0.14744	-0.395317	-0.530728	0.125774	0.440612	-0.0378929	-0.0956947	0.207491	-0.106314	0.699809	-0.326956	-1.41978	0.346824	-0.149175	0.0523205	-1.09241	0.090111	-0.352996	-0.664272	-0.00302373	-0.322761	2.95746
-144	-0.0754157	-0.398476	0.473977	0.237593	-0.937924	-1.72463	1.44459	-0.616137	-0.0637712	0.203362	-0.285427	-0.271273	-1.34261	-0.707587	-0.501944	-0.614693	0.45455	0.900536	-0.776132	-0.312194	0.623605	0.357315	0.377336	0.358761	-0.0985082	0.0373292	-0.604417	0.150146	-0.43995	-0.505357	0.088962	0.391832	0.140675	0.017112	0.399708	-0.1506	0.831725	-0.331571	-1.29702	0.382941	-0.223064	0.00466057	-1.08164	0.0912663	-0.302823	-0.856339	-0.0170951	-0.492426	3.08037
-142	-0.0772757	-0.190327	0.513414	0.333749	-1.08822	-1.7617	1.57181	-0.744975	-0.0474351	0.574958	-0.243743	-0.225066	-1.26825	-0.635004	-0.415809	-0.582606	0.669273	1.2907	-0.765882	-0.0892471	0.513291	0.831146	0.335025	0.403768	-0.0715534	0.158406	-0.461927	0.159367	-0.479558	-0.459211	0.0616089	0.346909	0.293744	0.14487	0.594858	-0.16231	0.898359	-0.327698	-1.12548	0.405176	-0.257326	-0.0495815	-1.02106	0.0849255	-0.247253	-1.04433	-0.0290068	-0.639635	3.1893
-140	-0.0635676	-0.00827411	0.513452	0.421943	-1.14591	-1.72782	1.61193	-0.917979	-0.00113835	0.906626	-0.168578	-0.157705	-1.17719	-0.521472	-0.344337	-0.536519	0.81541	1.58223	-0.698129	0.0776888	0.351337	1.20248	0.273413	0.438523	-0.0539829	0.250001	-0.309573	0.178	-0.507531	-0.394303	0.0492308	0.300887	0.411394	0.257091	0.780036	-0.135177	0.907286	-0.320324	-0.941166	0.411868	-0.24842	-0.10425	-0.913245	0.0694944	-0.192809	-1.19171	-0.0365628	-0.752353	3.30894
-138	-0.0377699	0.136958	0.487797	0.493786	-1.10405	-1.60543	1.52313	-1.08887	0.0818555	1.16222	-0.0568141	-0.0666329	-1.05563	-0.375401	-0.291516	-0.463502	0.879869	1.7641	-0.573909	0.192256	0.141498	1.36552	0.19363	0.459713	-0.0477991	0.303201	-0.161343	0.20767	-0.517324	-0.317256	0.051804	0.253179	0.49035	0.327841	0.941282	-0.0710766	0.873429	-0.309895	-0.78829	0.403936	-0.198322	-0.151509	-0.762779	0.0446071	-0.143514	-1.27495	-0.0383203	-0.820543	3.45155
-136	-0.00916804	0.249649	0.450375	0.544685	-0.971437	-1.37992	1.28888	-1.2117	0.203237	1.31509	0.0885573	0.0441565	-0.889732	-0.215168	-0.26215	-0.357664	0.865124	1.83967	-0.403607	0.271422	-0.101021	1.26731	0.0995677	0.464196	-0.0519058	0.317202	-0.0272757	0.247935	-0.504287	-0.237347	0.0668577	0.207717	0.532968	0.341423	1.06546	0.0192394	0.813879	-0.292118	-0.705196	0.386267	-0.115154	-0.183737	-0.57693	0.0116034	-0.100214	-1.29139	-0.0341876	-0.835879	3.61169
-134	0.0108518	0.345795	0.41073	0.573167	-0.772084	-1.04647	0.923158	-1.25037	0.35613	1.35362	0.25646	0.164035	-0.675741	-0.0650127	-0.257451	-0.222362	0.785272	1.82153	-0.205833	0.336975	-0.350226	0.911351	-0.00220788	0.449519	-0.0618824	0.298438	0.0876035	0.295747	-0.467511	-0.163075	0.092494	0.171643	0.545286	0.29485	1.14053	0.117757	0.74293	-0.260053	-0.71161	0.367891	-0.0124688	-0.195551	-0.366633	-0.0262195	-0.0613666	-1.26003	-0.0255501	-0.793151	3.76948
-132	0.0134595	0.44583	0.372593	0.579068	-0.541496	-0.615122	0.465107	-1.18553	0.523363	1.28371	0.42842	0.277492	-0.42724	0.0515915	-0.272069	-0.0695973	0.659956	1.72477	-0.00426206	0.406628	-0.573573	0.34715	-0.104564	0.41443	-0.0707822	0.258379	0.183175	0.345434	-0.410599	-0.0987411	0.128301	0.152823	0.534577	0.196672	1.15498	0.202717	0.668666	-0.207567	-0.802497	0.35966	0.0932523	-0.185292	-0.146875	-0.0637464	-0.0247451	-1.21449	-0.0148748	-0.693419	3.90045
-130	-0.00409932	0.566581	0.335434	0.561896	-0.319335	-0.113704	-0.0330341	-1.01755	0.678818	1.12717	0.581947	0.367671	-0.175019	0.118524	-0.294317	0.0831692	0.508762	1.56211	0.176949	0.488451	-0.738757	-0.345839	-0.203046	0.359495	-0.0709314	0.210982	0.263436	0.389415	-0.340765	-0.0425057	0.173826	0.156805	0.507059	0.0632162	1.09804	0.253444	0.591791	-0.132733	-0.951115	0.369413	0.18656	-0.155501	0.0641842	-0.094711	0.0108061	-1.19116	-0.00495959	-0.547187	3.98649
-128	-0.0376713	0.715444	0.297296	0.520495	-0.139835	0.412599	-0.518677	-0.765424	0.792305	0.916232	0.695422	0.420935	0.0415193	0.131118	-0.30946	0.217767	0.348057	1.34341	0.318197	0.580341	-0.820747	-1.07314	-0.29788	0.287769	-0.0562582	0.170398	0.335298	0.419578	-0.26648	0.0132486	0.226057	0.184151	0.466318	-0.0859183	0.961941	0.255667	0.506682	-0.0398188	-1.11975	0.396677	0.257231	-0.11232	0.247384	-0.112917	0.0443613	-1.21726	0.0018889	-0.375201	4.02229
-126	-0.0782955	0.888112	0.25691	0.454261	-0.0228901	0.9061	-0.947555	-0.463334	0.837379	0.685445	0.752776	0.430988	0.188077	0.0965257	-0.304372	0.320044	0.190706	1.07945	0.408642	0.673455	-0.806836	-1.73692	-0.392936	0.205204	-0.0243212	0.14902	0.406962	0.428959	-0.194678	0.0792068	0.278109	0.229138	0.41275	-0.231627	0.74592	0.206018	0.404281	0.060777	-1.27323	0.430226	0.302951	-0.0640701	0.385469	-0.113835	0.072995	-1.30422	0.00446903	-0.20546	4.01405
-124	-0.116084	1.06941	0.214157	0.365214	0.030685	1.30659	-1.28738	-0.15562	0.800167	0.463513	0.746562	0.401054	0.24792	0.0306648	-0.271507	0.383043	0.0475637	0.787517	0.448294	0.756885	-0.69862	-2.24619	-0.492099	0.120337	0.0228199	0.155796	0.485751	0.413277	-0.128693	0.164868	0.320558	0.280373	0.343996	-0.357748	0.459691	0.113979	0.276202	0.154479	-1.38928	0.450866	0.329029	-0.0194755	0.465926	-0.0961362	0.0928021	-1.44823	0.00290589	-0.067018	3.9723
-122	-0.143991	1.23599	0.169349	0.25968	0.0373773	1.56476	-1.5186	0.109805	0.686151	0.26793	0.678939	0.343128	0.226905	-0.0467695	-0.210878	0.407724	-0.0712633	0.494771	0.447148	0.820968	-0.511087	-2.5276	-0.59543	0.0429339	0.0793254	0.194799	0.575629	0.371916	-0.0677394	0.274142	0.345217	0.323205	0.256148	-0.45234	0.123985	-5.61959e-05	0.119118	0.22566	-1.46179	0.438908	0.344864	0.0139866	0.483173	-0.0625812	0.100375	-1.63624	-0.00156063	0.0172251	3.90338
-120	-0.159823	1.35997	0.122611	0.148532	0.0229937	1.65486	-1.63476	0.290389	0.521528	0.103954	0.560901	0.274501	0.148566	-0.11737	-0.129895	0.401329	-0.156954	0.236732	0.421467	0.858352	-0.269693	-2.53615	-0.697593	-0.0181897	0.137628	0.264334	0.675047	0.308193	-0.00802951	0.402441	0.349588	0.34319	0.145437	-0.50812	-0.233148	-0.110627	-0.0618807	0.261066	-1.49647	0.382811	0.358618	0.0312289	0.439825	-0.0197521	0.0942039	-1.85335	-0.0071194	0.0360861	3.80495
-118	-0.165896	1.41314	0.0742286	0.04566	0.011656	1.58137	-1.64299	0.359603	0.347108	-0.0324359	0.410329	0.212854	0.0419302	-0.16774	-0.0416178	0.374262	-0.204603	0.0502985	0.388449	0.863745	-0.0062812	-2.26219	-0.78922	-0.0574292	0.190918	0.356944	0.776142	0.22891	0.0550155	0.53666	0.339618	0.329644	0.0099535	-0.522341	-0.583206	-0.195109	-0.25237	0.252827	-1.50222	0.284484	0.3727	0.0300135	0.346963	0.0235201	0.0756037	-2.08735	-0.0120508	-0.00770129	3.66751
-116	-0.166956	1.37194	0.0258034	-0.0348926	0.0165545	1.37639	-1.56311	0.316433	0.205667	-0.149581	0.24928	0.17178	-0.0713981	-0.19132	0.0379157	0.336782	-0.216706	-0.0361405	0.361141	0.834044	0.245594	-1.73096	-0.859929	-0.0738283	0.234968	0.460575	0.866015	0.143314	0.124365	0.65854	0.329043	0.278324	-0.149254	-0.496278	-0.904231	-0.240597	-0.430918	0.200448	-1.48271	0.158546	0.382567	0.0107804	0.223244	0.0586663	0.0489818	-2.32897	-0.0152577	-0.0989094	3.4807
-114	-0.167679	1.22236	-0.0188248	-0.0822242	0.036461	1.08854	-1.42351	0.189373	0.126991	-0.255492	0.100714	0.158312	-0.184135	-0.18852	0.0930041	0.296527	-0.205415	-0.0114902	0.345353	0.769727	0.4556	-0.994238	-0.901118	-0.0711415	0.268515	0.560825	0.930112	0.0616383	0.199703	0.750546	0.335074	0.192479	-0.328297	-0.434587	-1.18461	-0.246894	-0.574218	0.111306	-1.43197	0.0263467	0.379682	-0.0238825	0.0925392	0.0800025	0.0213687	-2.56906	-0.0164737	-0.2139	3.24031
-112	-0.171027	0.96377	-0.0539994	-0.0913133	0.0590972	0.768035	-1.25385	0.0316707	0.116649	-0.354947	-0.0149635	0.173059	-0.300923	-0.165683	0.112044	0.257418	-0.191774	0.113867	0.339417	0.676875	0.601477	-0.117434	-0.907524	-0.0566628	0.292215	0.643844	0.956691	-0.006535	0.277129	0.802107	0.371775	0.0818967	-0.521972	-0.344724	-1.42198	-0.224497	-0.663313	-0.000676138	-1.33545	-0.0916758	0.357095	-0.0697538	-0.0199935	0.0864666	0.00121183	-2.79556	-0.0161044	-0.325948	2.95239
-110	-0.177951	0.610316	-0.0743302	-0.0644405	0.0689863	0.453875	-1.07693	-0.0919866	0.153542	-0.448492	-0.0829081	0.212386	-0.428547	-0.133227	0.0912141	0.219912	-0.201369	0.309833	0.336521	0.568111	0.673254	0.831745	-0.87785	-0.0395145	0.30688	0.699176	0.940855	-0.0538478	0.350448	0.813593	0.44352	-0.0398869	-0.726077	-0.236395	-1.61802	-0.188848	-0.688682	-0.117964	-1.17565	-0.181278	0.314533	-0.121195	-0.0929584	0.08172	-0.003485	-2.99235	-0.0148343	-0.410589	2.63281
-108	-0.188046	0.189396	-0.0776949	-0.0108613	0.0554081	0.167764	-0.903435	-0.123339	0.197745	-0.532796	-0.0956936	0.271174	-0.564542	-0.103097	0.0369505	0.182231	-0.257437	0.533262	0.328445	0.46112	0.67581	1.78912	-0.815164	-0.0291321	0.312119	0.721695	0.88666	-0.0763691	0.413656	0.7962	0.541071	-0.159352	-0.939243	-0.120837	-1.77211	-0.153775	-0.652467	-0.223147	-0.940207	-0.235459	0.260026	-0.171097	-0.113616	0.0724798	0.0126164	-3.14062	-0.0132349	-0.450226	2.30283
-106	-0.200303	-0.262215	-0.0677311	0.0552918	0.0166633	-0.0845154	-0.731926	-0.0270446	0.205733	-0.601787	-0.0537244	0.344596	-0.690701	-0.0857007	-0.034149	0.142099	-0.373711	0.737129	0.309129	0.374763	0.628513	2.69433	-0.727156	-0.0342448	0.306146	0.711991	0.806535	-0.074183	0.463671	0.767671	0.642004	-0.266482	-1.1631	-0.00978462	-1.877	-0.127102	-0.567397	-0.302261	-0.629686	-0.252419	0.207112	-0.210955	-0.0809811	0.0656907	0.0501923	-3.22173	-0.0115907	-0.437455	1.98296
-104	-0.213323	-0.703076	-0.0544742	0.118408	-0.0405494	-0.306473	-0.554248	0.199246	0.147072	-0.648331	0.0355147	0.428027	-0.775232	-0.0870166	-0.0987838	0.0984564	-0.549649	0.879788	0.276814	0.324277	0.56093	3.48943	-0.625682	-0.0621072	0.286823	0.674996	0.718114	-0.0512548	0.502022	0.745629	0.715803	-0.356812	-1.40041	0.0856501	-1.91884	-0.109935	-0.453238	-0.346724	-0.262628	-0.233393	0.169163	-0.231639	-0.00585941	0.0656598	0.104262	-3.21994	-0.0100039	-0.376611	1.68707
-102	-0.225092	-1.09134	-0.0525681	0.165165	-0.105052	-0.502766	-0.363891	0.523391	0.0161886	-0.666368	0.158856	0.515375	-0.782941	-0.10702	-0.13318	0.0526949	-0.769963	0.932567	0.234125	0.317359	0.504991	4.11961	-0.525003	-0.117514	0.253205	0.617328	0.639342	-0.0146695	0.534462	0.74117	0.73233	-0.431492	-1.65218	0.155752	-1.88165	-0.0990439	-0.332244	-0.353656	0.124374	-0.182704	0.15393	-0.225161	0.0923634	0.0723047	0.164837	-3.12449	-0.00865749	-0.282923	1.41872
-100	-0.232989	-1.38813	-0.0775095	0.187498	-0.165577	-0.672599	-0.163548	0.885115	-0.164994	-0.653144	0.299229	0.597233	-0.688994	-0.140383	-0.120029	0.00892209	-1.00881	0.884553	0.186438	0.352232	0.485769	4.53758	-0.438978	-0.201405	0.206609	0.544439	0.583199	0.0265024	0.568256	0.755084	0.67112	-0.495568	-1.91518	0.192425	-1.75457	-0.0904313	-0.225022	-0.32519	0.482732	-0.109892	0.161049	-0.187146	0.191135	0.0811738	0.219336	-2.93088	-0.00800798	-0.178974	1.17059
-98	-0.234628	-1.56081	-0.141203	0.183828	-0.213547	-0.806121	0.0314292	1.20812	-0.354107	-0.610801	0.437996	0.660539	-0.49022	-0.179407	-0.0534563	-0.0269854	-1.23721	0.743699	0.139519	0.417717	0.514261	4.70928	-0.378253	-0.309424	0.150576	0.458839	0.553704	0.0624493	0.608025	0.7777	0.528494	-0.555263	-2.18157	0.189158	-1.53929	-0.0820693	-0.147657	-0.267572	0.763098	-0.0314556	0.183309	-0.119074	0.270623	0.0851257	0.256122	-2.64188	-0.0087274	-0.0888252	0.92728
-96	-0.229464	-1.58697	-0.248373	0.158261	-0.24388	-0.88404	0.195221	1.41595	-0.502034	-0.546475	0.558026	0.690719	-0.209209	-0.217799	0.0599149	-0.0494361	-1.43087	0.533797	0.0976985	0.49481	0.585122	4.61821	-0.348539	-0.431212	0.0898377	0.360179	0.544653	0.0838305	0.651919	0.791911	0.320108	-0.615203	-2.44066	0.141432	-1.25444	-0.0747248	-0.110418	-0.190526	0.928333	0.0307789	0.210309	-0.0291616	0.318424	0.0768871	0.267943	-2.26836	-0.0113862	-0.0312167	0.670583
-94	-0.220214	-1.45949	-0.395053	0.118285	-0.254729	-0.880211	0.298458	1.44972	-0.567988	-0.470537	0.647146	0.675869	0.110392	-0.253201	0.203864	-0.055668	-1.57565	0.287849	0.0634091	0.559464	0.68024	4.26709	-0.350454	-0.551234	0.0290248	0.247106	0.541795	0.0829628	0.690038	0.777913	0.0780071	-0.676447	-2.68214	0.0480668	-0.934704	-0.0709346	-0.11789	-0.106631	0.963184	0.0556721	0.232134	0.0688765	0.332009	0.0514563	0.253991	-1.82938	-0.0160591	-0.0139928	0.385437
-92	-0.212972	-1.19089	-0.569611	0.0720147	-0.247113	-0.767053	0.317066	1.2848	-0.530694	-0.393519	0.700797	0.611227	0.41535	-0.286982	0.357661	-0.0478163	-1.66873	0.0397218	0.0381627	0.586638	0.776353	3.67786	-0.380587	-0.651451	-0.0281263	0.119898	0.52778	0.0550068	0.706178	0.717975	-0.157003	-0.735873	-2.89916	-0.0866595	-0.623797	-0.0729188	-0.170104	-0.0300824	0.876528	0.0311957	0.241254	0.159068	0.318571	0.0075557	0.219792	-1.35087	-0.022111	-0.031909	0.064362
-90	-0.215449	-0.814535	-0.755877	0.0260666	-0.224657	-0.523228	0.239763	0.941812	-0.392373	-0.323181	0.722478	0.501768	0.656582	-0.321441	0.500805	-0.0335565	-1.71592	-0.183162	0.0241854	0.555557	0.853257	2.89142	-0.433189	-0.715435	-0.0787379	-0.0174013	0.487906	-0.00095225	0.682571	0.60004	-0.34545	-0.78703	-3.08983	-0.251038	-0.363099	-0.0804094	-0.263903	0.0255642	0.695357	-0.0388268	0.232531	0.227389	0.292464	-0.0521325	0.175095	-0.862519	-0.0283311	-0.06895	-0.291292
-88	-0.233847	-0.380348	-0.93719	-0.0154315	-0.192921	-0.141909	0.0720734	0.486949	-0.175373	-0.263247	0.721239	0.361552	0.800284	-0.356231	0.61562	-0.0248107	-1.72686	-0.363716	0.0255463	0.455421	0.899249	1.96664	-0.501896	-0.732837	-0.120228	-0.156324	0.414301	-0.0812264	0.605866	0.419775	-0.458956	-0.822046	-3.25671	-0.425403	-0.17988	-0.0892469	-0.393778	0.0503743	0.453691	-0.133518	0.202601	0.265398	0.270953	-0.121706	0.130684	-0.393731	-0.0333714	-0.104488	-0.67356
-86	-0.269715	0.0548712	-1.09988	-0.0507808	-0.157825	0.363142	-0.163412	0.0188996	0.0859377	-0.21448	0.706995	0.209915	0.83316	-0.386365	0.687645	-0.0346967	-1.71064	-0.495064	0.0478107	0.289923	0.912111	0.975728	-0.581015	-0.702789	-0.149858	-0.285088	0.306951	-0.177639	0.471961	0.181453	-0.487072	-0.833779	-3.40428	-0.58411	-0.0798989	-0.0913691	-0.551731	0.0407359	0.18192	-0.220678	0.15013	0.271963	0.269369	-0.193288	0.0953589	0.030448	-0.0362637	-0.120845	-1.07229
-84	-0.318236	0.439712	-1.23496	-0.0801027	-0.123342	0.956439	-0.429754	-0.355145	0.354208	-0.177236	0.685771	0.0660989	0.761162	-0.403284	0.705222	-0.0735722	-1.67354	-0.577751	0.0959812	0.0785992	0.896153	-0.00583657	-0.665841	-0.635009	-0.164898	-0.391062	0.171691	-0.278689	0.287744	-0.101739	-0.43938	-0.817427	-3.53564	-0.700267	-0.0475837	-0.0764573	-0.726484	0.000587083	-0.0986962	-0.267563	0.0773986	0.252527	0.297001	-0.258383	0.0739921	0.392197	-0.0367417	-0.109064	-1.47958
-82	-0.368698	0.738421	-1.33773	-0.104614	-0.0893943	1.58561	-0.680805	-0.547346	0.595967	-0.153596	0.657353	-0.0554755	0.603558	-0.398605	0.660046	-0.145457	-1.61882	-0.616667	0.171368	-0.146354	0.857417	-0.913932	-0.751662	-0.548027	-0.163471	-0.463848	0.0167014	-0.371698	0.0691892	-0.40777	-0.342278	-0.771296	-3.64957	-0.752364	-0.0536035	-0.0349561	-0.903034	-0.0595679	-0.374892	-0.252425	-0.00782038	0.216389	0.354806	-0.309154	0.0669721	0.682165	-0.0352192	-0.0704891	-1.89207
-80	-0.407012	0.935521	-1.40586	-0.125938	-0.0513055	2.19065	-0.868972	-0.51203	0.785208	-0.147453	0.616718	-0.147554	0.385417	-0.368609	0.549495	-0.246162	-1.54766	-0.619354	0.268644	-0.347704	0.799656	-1.70936	-0.831683	-0.464891	-0.145658	-0.498115	-0.150513	-0.445464	-0.163246	-0.706794	-0.231245	-0.697028	-3.73943	-0.730792	-0.066219	0.0384327	-1.06354	-0.125669	-0.635702	-0.172207	-0.0919167	0.173198	0.435433	-0.339561	0.0707855	0.899035	-0.0324767	-0.0138345	-2.31005
-78	-0.419334	1.03411	-1.4374	-0.145407	-0.00180858	2.71418	-0.955575	-0.256534	0.904478	-0.162427	0.558643	-0.209558	0.131291	-0.317003	0.379857	-0.364	-1.45985	-0.595635	0.374443	-0.493357	0.72295	-2.38368	-0.894975	-0.407576	-0.114261	-0.49546	-0.324419	-0.492621	-0.389967	-0.964181	-0.140762	-0.599832	-3.79477	-0.641664	-0.0613854	0.142037	-1.18983	-0.184067	-0.866266	-0.0434922	-0.157997	0.130048	0.525251	-0.346275	0.0793066	1.04759	-0.02926	0.0503745	-2.73365
-76	-0.39569	1.05035	-1.43012	-0.163399	0.0643987	3.10929	-0.92188	0.162516	0.945106	-0.199097	0.483084	-0.245162	-0.138381	-0.254329	0.168336	-0.483054	-1.35409	-0.557076	0.468499	-0.565828	0.625316	-2.95329	-0.925993	-0.391732	-0.0747676	-0.464723	-0.50104	-0.510941	-0.596351	-1.14619	-0.0948685	-0.488876	-3.8052	-0.505831	-0.0278755	0.266345	-1.26659	-0.224988	-1.04475	0.103335	-0.191106	0.0900717	0.607551	-0.329172	0.0854366	1.13552	-0.0260032	0.114983	-3.15804
-74	-0.332693	1.00797	-1.38252	-0.178946	0.145037	3.34357	-0.776638	0.655727	0.907603	-0.253649	0.398359	-0.259559	-0.408146	-0.194032	-0.0583197	-0.587842	-1.22828	-0.5148	0.52757	-0.567517	0.506014	-3.44387	-0.906729	-0.423246	-0.0344621	-0.420537	-0.676738	-0.503089	-0.774396	-1.22762	-0.101219	-0.377236	-3.76505	-0.352758	0.0333298	0.395321	-1.28388	-0.244299	-1.14398	0.234099	-0.184113	0.0527149	0.666004	-0.291249	0.0828267	1.16955	-0.0227723	0.178576	-3.56953
-72	-0.234855	0.934822	-1.29616	-0.189892	0.226275	3.40014	-0.555656	1.12534	0.802073	-0.319043	0.320171	-0.257746	-0.666625	-0.146899	-0.269249	-0.667456	-1.08074	-0.475643	0.53145	-0.519563	0.368322	-3.87214	-0.821398	-0.497426	-0.000986672	-0.380305	-0.847286	-0.474962	-0.921848	-1.19921	-0.150333	-0.280419	-3.67673	-0.211312	0.11345	0.509431	-1.23781	-0.243242	-1.13698	0.321029	-0.141422	0.0152397	0.687763	-0.237887	0.067374	1.15208	-0.019371	0.244356	-3.94485
-70	-0.114301	0.861182	-1.17783	-0.19367	0.283251	3.27745	-0.31177	1.49069	0.647536	-0.388136	0.26661	-0.244205	-0.904952	-0.11651	-0.437438	-0.717464	-0.912035	-0.438538	0.469366	-0.454487	0.219957	-4.23391	-0.662251	-0.600718	0.0191496	-0.360273	-1.00779	-0.433298	-1.03972	-1.072	-0.219885	-0.212887	-3.55086	-0.101231	0.201208	0.589425	-1.12954	-0.226676	-1.00436	0.349594	-0.0783436	-0.0253594	0.665939	-0.17566	0.0380867	1.07995	-0.0154769	0.316633	-4.25413
-68	0.0111093	0.817134	-1.04026	-0.188347	0.28645	2.98945	-0.0984484	1.70736	0.469154	-0.456925	0.251182	-0.22336	-1.11539	-0.0980882	-0.547059	-0.739061	-0.726356	-0.393758	0.344437	-0.405459	0.0709295	-4.50381	-0.434337	-0.714193	0.0217289	-0.371717	-1.15338	-0.383481	-1.12969	-0.876307	-0.282299	-0.183316	-3.40321	-0.0288824	0.286868	0.619996	-0.963807	-0.200884	-0.741056	0.320247	-0.0159739	-0.070753	0.601288	-0.111023	-0.00298154	0.946731	-0.0107104	0.397004	-4.46698
-66	0.121101	0.827559	-0.900651	-0.173482	0.212522	2.56583	0.0460826	1.77392	0.293364	-0.526054	0.276887	-0.199855	-1.29049	-0.0815561	-0.59707	-0.736526	-0.530775	-0.326634	0.17414	-0.396458	-0.0696294	-4.6466	-0.157161	-0.817719	0.00549069	-0.418243	-1.28009	-0.328306	-1.1928	-0.655175	-0.313038	-0.190542	-3.24942	0.0112101	0.36432	0.592813	-0.748348	-0.171855	-0.360648	0.245587	0.0263655	-0.120444	0.502827	-0.0492723	-0.0516653	0.748599	-0.00465725	0.482014	-4.55954
-64	0.197282	0.905446	-0.777227	-0.150436	0.0554834	2.05073	0.107513	1.72402	0.142161	-0.599754	0.333823	-0.178153	-1.42294	-0.0574983	-0.599673	-0.714909	-0.332216	-0.224871	-0.0138967	-0.43694	-0.195452	-4.63437	0.138007	-0.893797	-0.0276758	-0.494866	-1.38536	-0.268015	-1.23009	-0.45421	-0.297224	-0.222495	-3.10005	0.0305428	0.431583	0.508567	-0.494759	-0.144328	0.103738	0.14501	0.0378241	-0.171802	0.386858	0.00593658	-0.102996	0.491881	0.00304738	0.563175	-4.51967
-62	0.227532	1.04651	-0.684916	-0.122187	-0.166707	1.49871	0.0944705	1.60758	0.0284186	-0.682687	0.401267	-0.161718	-1.50616	-0.0230801	-0.574603	-0.679303	-0.133646	-0.0861929	-0.189456	-0.522156	-0.302799	-4.46107	0.41496	-0.930388	-0.0729837	-0.589029	-1.46773	-0.201377	-1.24481	-0.311162	-0.233061	-0.259307	-2.95757	0.0399668	0.490382	0.377608	-0.219887	-0.121338	0.602377	0.0392772	0.0190815	-0.220783	0.274066	0.0524359	-0.152235	0.199186	0.0124851	0.629051	-4.34827
-60	0.209213	1.22826	-0.631424	-0.0928754	-0.413667	0.967376	0.0307638	1.46929	-0.0460583	-0.776086	0.453371	-0.152569	-1.53569	0.0152104	-0.54183	-0.635607	0.0677304	0.0776673	-0.327827	-0.637478	-0.388659	-4.14753	0.641748	-0.922331	-0.123505	-0.683264	-1.52604	-0.127332	-1.24444	-0.248491	-0.131603	-0.279747	-2.81644	0.0455003	0.545289	0.218598	0.0538304	-0.103805	1.07584	-0.0533387	-0.0191294	-0.263015	0.184968	0.0889269	-0.195251	-0.0892744	0.0231138	0.668378	-4.05611
-58	0.149989	1.41474	-0.614982	-0.0673083	-0.632322	0.508048	-0.0534424	1.3339	-0.0891408	-0.874774	0.466363	-0.151706	-1.51084	0.0436037	-0.515349	-0.591365	0.27817	0.243085	-0.415396	-0.763748	-0.449643	-3.73461	0.799228	-0.87129	-0.171497	-0.758924	-1.55877	-0.0466366	-1.24091	-0.270668	-0.0132536	-0.268353	-2.66565	0.0479972	0.602688	0.0550005	0.300341	-0.0901195	1.46532	-0.118887	-0.0607954	-0.29489	0.134919	0.114283	-0.228345	-0.320789	0.0335069	0.67298	-3.65823
-56	0.0657098	1.5658	-0.624469	-0.0503817	-0.771556	0.157079	-0.127153	1.20341	-0.114246	-0.966347	0.42485	-0.160157	-1.43565	0.0470687	-0.499782	-0.555251	0.501349	0.382081	-0.451007	-0.881283	-0.483239	-3.26818	0.885796	-0.784382	-0.21017	-0.800254	-1.5645	0.0370047	-1.24794	-0.365968	0.0979775	-0.220242	-2.49251	0.0456925	0.669706	-0.0898146	0.494241	-0.076048	1.7247	-0.148093	-0.0902541	-0.314363	0.130391	0.127218	-0.248009	-0.440695	0.0414017	0.639503	-3.16956
-54	-0.0240455	1.6478	-0.64196	-0.0462976	-0.796651	-0.0695193	-0.160323	1.0648	-0.135051	-1.03301	0.325408	-0.179678	-1.31843	0.0164994	-0.490314	-0.534912	0.731609	0.471717	-0.443283	-0.971949	-0.491072	-2.7834	0.916371	-0.671923	-0.23545	-0.797956	-1.54362	0.116724	-1.27645	-0.51099	0.181059	-0.141757	-2.2865	0.0373762	0.753093	-0.197193	0.616003	-0.0554826	1.83147	-0.136112	-0.0964838	-0.321295	0.167902	0.126601	-0.251056	-0.405111	0.044171	0.569661	-2.60466
-52	-0.101132	1.64275	-0.646999	-0.05757	-0.698718	-0.176371	-0.124611	0.901552	-0.160928	-1.05567	0.176845	-0.212181	-1.16954	-0.0462801	-0.475656	-0.534333	0.950639	0.500845	-0.40561	-1.02007	-0.481859	-2.29579	0.915824	-0.544856	-0.247081	-0.751405	-1.50071	0.183471	-1.33014	-0.675892	0.223707	-0.047247	-2.04193	0.0243069	0.857833	-0.255745	0.656359	-0.0221574	1.79281	-0.0823715	-0.0750628	-0.317261	0.235788	0.112288	-0.235269	-0.191831	0.0396158	0.469251	-1.98215
-50	-0.152796	1.55327	-0.621413	-0.0841089	-0.496498	-0.184257	0.00403882	0.702284	-0.194598	-1.01903	-0.00237208	-0.257764	-0.998068	-0.127936	-0.443094	-0.552371	1.1303	0.471321	-0.350942	-1.01316	-0.471461	-1.80298	0.909214	-0.412522	-0.248503	-0.668878	-1.44581	0.228124	-1.40358	-0.829039	0.225824	0.0460535	-1.75942	0.010311	0.98516	-0.261068	0.618484	0.0280522	1.6442	0.00929045	-0.0280823	-0.304946	0.317774	0.0860391	-0.200283	0.193719	0.0267911	0.346626	-1.33092
-48	-0.173158	1.40214	-0.553311	-0.122825	-0.230643	-0.123105	0.240584	0.463309	-0.23255	-0.916086	-0.188261	-0.312307	-0.809209	-0.20764	-0.384055	-0.583394	1.24115	0.394	-0.288072	-0.942867	-0.479112	-1.29559	0.912197	-0.281299	-0.245422	-0.565685	-1.393	0.244176	-1.48397	-0.940934	0.199603	0.122646	-1.44584	0.000683975	1.13014	-0.213435	0.517588	0.0949894	1.44045	0.130362	0.037099	-0.287304	0.396679	0.0518861	-0.148302	0.718687	0.00652142	0.211322	-0.693526
-46	-0.162252	1.2266	-0.439287	-0.168062	0.0471015	-0.0255213	0.585855	0.186957	-0.267662	-0.75046	-0.355724	-0.366216	-0.603433	-0.263863	-0.298022	-0.619517	1.26318	0.282689	-0.220126	-0.806304	-0.52136	-0.771662	0.924825	-0.154431	-0.243551	-0.460666	-1.35591	0.230012	-1.55553	-0.987932	0.166158	0.171463	-1.11327	0.000781676	1.27973	-0.115347	0.378278	0.172952	1.2418	0.267661	0.109505	-0.266721	0.457124	0.0156365	-0.0843261	1.32872	-0.0186257	0.0732501	-0.123331
-44	-0.123773	1.06882	-0.284489	-0.2128	0.286152	0.0771608	1.02373	-0.120581	-0.29259	-0.536255	-0.482274	-0.405551	-0.378182	-0.281153	-0.192934	-0.652963	1.19413	0.150005	-0.145348	-0.607863	-0.606689	-0.2481	0.930832	-0.0329917	-0.24648	-0.371972	-1.34178	0.189759	-1.60448	-0.956025	0.149525	0.186638	-0.776773	0.0147697	1.41296	0.0292911	0.230373	0.250761	1.09968	0.404022	0.176297	-0.244389	0.487046	-0.0163884	-0.0157346	1.95808	-0.0449267	-0.0575281	0.324698
-42	-0.0630313	0.965218	-0.100859	-0.25022	0.447315	0.156626	1.52135	-0.449352	-0.302326	-0.295452	-0.550733	-0.415596	-0.131357	-0.254402	-0.0816888	-0.677129	1.05199	0.00740265	-0.0597254	-0.36137	-0.733347	0.236006	0.903023	0.082452	-0.25453	-0.313145	-1.34681	0.132189	-1.62235	-0.844258	0.169602	0.167309	-0.451537	0.0445749	1.50448	0.213799	0.103869	0.313325	1.04589	0.520003	0.224592	-0.219978	0.478656	-0.0388504	0.0487068	2.54185	-0.0684517	-0.170884	0.606028
-40	0.0139468	0.937357	0.0957737	-0.275126	0.508718	0.189231	2.03148	-0.784026	-0.294978	-0.0537209	-0.550977	-0.385613	0.13485	-0.189424	0.0234992	-0.685978	0.871215	-0.131456	0.0393075	-0.0915769	-0.890899	0.626058	0.813667	0.190294	-0.265055	-0.290357	-1.35555	0.0680074	-1.60643	-0.666582	0.235942	0.117363	-0.149656	0.0891295	1.53108	0.426142	0.023807	0.344607	1.08773	0.596677	0.243313	-0.191642	0.429379	-0.0485237	0.100317	3.02771	-0.0860511	-0.2571	0.696314
-38	0.100228	0.987115	0.289028	-0.284844	0.466956	0.159441	2.49638	-1.10263	-0.270921	0.164531	-0.480843	-0.312823	0.411382	-0.100237	0.115726	-0.672593	0.694422	-0.247184	0.149319	0.167074	-1.06409	0.866968	0.646909	0.28728	-0.273889	-0.301334	-1.34524	0.00661298	-1.55794	-0.450869	0.344155	0.0452556	0.122358	0.144297	1.47913	0.647057	0.00588135	0.331524	1.209	0.619175	0.224833	-0.156369	0.342775	-0.044698	0.132228	3.38436	-0.0960541	-0.308085	0.595174
-36	0.187519	1.09717	0.465167	-0.279486	0.334402	0.0647868	2.85337	-1.3773	-0.231302	0.341031	-0.346256	-0.203951	0.682043	-0.00456504	0.194392	-0.628398	0.562772	-0.3146	0.261006	0.376339	-1.23671	0.921401	0.408778	0.369218	-0.277159	-0.336208	-1.29343	-0.0463621	-1.47924	-0.234406	0.476087	-0.0366516	0.364333	0.203842	1.34958	0.850714	0.0536428	0.267876	1.37604	0.580156	0.166189	-0.11074	0.228784	-0.0288593	0.141023	3.60459	-0.0984806	-0.319113	0.32355
-34	0.266373	1.23657	0.615615	-0.261629	0.134278	-0.0802762	3.04341	-1.5773	-0.177	0.467528	-0.160584	-0.0738053	0.925703	0.0806792	0.262235	-0.544176	0.507599	-0.307824	0.359299	0.504435	-1.39408	0.784152	0.13044	0.432615	-0.272577	-0.380132	-1.18571	-0.0898236	-1.3718	-0.0562792	0.604013	-0.113801	0.580903	0.261235	1.15791	1.00866	0.157869	0.157015	1.54746	0.482092	0.0696853	-0.0521005	0.102635	-0.00390618	0.127826	3.70209	-0.0947565	-0.290324	-0.0825717
-32	0.327487	1.36971	0.738208	-0.235567	-0.105018	-0.244706	3.02229	-1.67352	-0.108528	0.547661	0.0567305	0.0583838	1.12026	0.142651	0.320655	-0.412976	0.545021	-0.2094	0.427664	0.537295	-1.52393	0.486358	-0.137574	0.476181	-0.259726	-0.417062	-1.02	-0.126188	-1.23573	0.0517852	0.697969	-0.172081	0.778328	0.31134	0.929057	1.09627	0.29822	0.012114	1.68536	0.337399	-0.0571947	0.0199514	-0.0178195	0.0268047	0.0983775	3.70396	-0.0870951	-0.227094	-0.578052
-30	0.363839	1.46591	0.836725	-0.206254	-0.355298	-0.386847	2.77157	-1.644	-0.0266624	0.595963	0.282117	0.173397	1.24722	0.174102	0.366649	-0.233751	0.67415	-0.0198973	0.454228	0.485417	-1.6167	0.0872723	-0.338895	0.501218	-0.239432	-0.433643	-0.805921	-0.159174	-1.07088	0.0737283	0.734317	-0.200558	0.96142	0.350935	0.689145	1.09952	0.446897	-0.146382	1.76522	0.16608	-0.202629	0.102199	-0.115883	0.0603649	0.0619139	3.64196	-0.0777984	-0.138817	-1.11135
-28	0.372934	1.50655	0.91871	-0.178131	-0.592869	-0.46482	2.30484	-1.48008	0.0668025	0.633666	0.490297	0.255848	1.29576	0.173404	0.393474	-0.0138614	0.87874	0.236372	0.437014	0.38193	-1.66616	-0.343089	-0.428007	0.51067	-0.212783	-0.422055	-0.559999	-0.191365	-0.878658	0.014065	0.703039	-0.193271	1.13249	0.377754	0.457673	1.01957	0.573749	-0.295486	1.78119	-0.00855286	-0.352069	0.187211	-0.18	0.095022	0.029041	3.54592	-0.0687096	-0.0364744	-1.62415
-26	0.358319	1.48727	0.992333	-0.154085	-0.800984	-0.448386	1.66614	-1.19187	0.168586	0.682011	0.657131	0.29668	1.26558	0.143697	0.394613	0.231113	1.13152	0.512871	0.38561	0.271474	-1.67029	-0.743124	-0.384121	0.507654	-0.180407	-0.381002	-0.299432	-0.222421	-0.663572	-0.102458	0.611392	-0.149602	1.29296	0.38889	0.243093	0.873013	0.652075	-0.415059	1.74459	-0.164831	-0.490447	0.264145	-0.206864	0.130533	0.00917229	3.44059	-0.0609424	0.0699675	-2.05061
-24	0.329673	1.41439	1.06348	-0.134945	-0.969912	-0.329092	0.92123	-0.81046	0.273869	0.754781	0.762744	0.294287	1.16781	0.0917655	0.368426	0.480648	1.39998	0.750476	0.318219	0.194325	-1.63179	-1.07323	-0.217262	0.494708	-0.142333	-0.314834	-0.0372005	-0.248432	-0.433813	-0.236775	0.482505	-0.073542	1.44644	0.37999	0.0430896	0.687513	0.664165	-0.492094	1.67626	-0.286833	-0.604471	0.321111	-0.202708	0.168003	0.00822589	3.34512	-0.0548841	0.173203	-2.3197
-22	0.301158	1.29737	1.13417	-0.119819	-1.09477	-0.12607	0.145386	-0.383972	0.376592	0.852601	0.794521	0.254531	1.02359	0.0270692	0.320457	0.714494	1.65237	0.89297	0.255419	0.172964	-1.55719	-1.31983	0.0355305	0.47452	-0.0984136	-0.231513	0.219846	-0.262562	-0.200496	-0.345442	0.349046	0.0273781	1.60055	0.346193	-0.151205	0.494298	0.605424	-0.522546	1.59645	-0.366419	-0.684359	0.34854	-0.182141	0.209143	0.0271723	3.27289	-0.0503707	0.268679	-2.36303
-20	0.288178	1.14129	1.20272	-0.107288	-1.17224	0.114575	-0.587447	0.0331886	0.470101	0.961479	0.749297	0.189793	0.860077	-0.0390385	0.261944	0.91766	1.86287	0.903431	0.213698	0.207243	-1.45476	-1.49056	0.32245	0.451695	-0.0490108	-0.140366	0.470125	-0.256779	0.0241136	-0.391575	0.243757	0.142944	1.76564	0.284468	-0.34929	0.32015	0.48602	-0.510345	1.51652	-0.402743	-0.724505	0.342331	-0.164507	0.255097	0.06176	3.23052	-0.0469129	0.353354	-2.12779
-18	0.303231	0.943635	1.26517	-0.0968955	-1.19795	0.328148	-1.21179	0.394636	0.548125	1.05684	0.634097	0.117018	0.704214	-0.0941699	0.205349	1.08304	2.01527	0.775507	0.201627	0.279815	-1.33205	-1.60425	0.593177	0.434164	0.00437647	-0.0502536	0.714864	-0.224254	0.22882	-0.353469	0.189883	0.260922	1.95037	0.195844	-0.556203	0.181716	0.329419	-0.464303	1.43589	-0.399771	-0.723078	0.305391	-0.168531	0.305235	0.103458	3.21639	-0.0438883	0.423922	-1.59147
-16	0.352045	0.697933	1.31712	-0.0900664	-1.16595	0.447	-1.6746	0.67367	0.605939	1.11215	0.46516	0.0547799	0.576462	-0.12621	0.159342	1.21076	2.10481	0.535164	0.219763	0.36802	-1.19455	-1.68027	0.813054	0.432706	0.0587831	0.0317903	0.955263	-0.161708	0.405397	-0.228565	0.194705	0.368041	2.15676	0.0859305	-0.76996	0.0836995	0.167901	-0.394376	1.34416	-0.363106	-0.681054	0.246724	-0.206803	0.356468	0.141413	3.22052	-0.0406819	0.475433	-0.773406
-14	0.431272	0.402917	1.35512	-0.0896529	-1.07092	0.419819	-1.93837	0.866874	0.641341	1.10879	0.265489	0.0197292	0.486904	-0.125192	0.125743	1.30493	2.13744	0.232308	0.263138	0.455281	-1.04617	-1.73049	0.969626	0.458067	0.109883	0.101624	1.18999	-0.0709419	0.549562	-0.032387	0.248416	0.451788	2.37789	-0.0369331	-0.981852	0.0208617	0.0358783	-0.30888	1.22623	-0.297652	-0.601338	0.178257	-0.28194	0.403476	0.165024	3.2273	-0.0368009	0.501053	0.26156
-12	0.528723	0.0723859	1.37708	-0.0980793	-0.911814	0.228146	-1.98541	0.988492	0.65502	1.04317	0.0615072	0.0232088	0.435838	-0.0853979	0.0996439	1.36968	2.12642	-0.073932	0.324233	0.535955	-0.891199	-1.75551	1.06902	0.516595	0.152576	0.158802	1.41342	0.0410905	0.660835	0.206214	0.328621	0.502941	2.60026	-0.165004	-1.17875	-0.0176619	-0.037584	-0.213585	1.06764	-0.207001	-0.488361	0.110666	-0.385788	0.439893	0.166603	3.22063	-0.0319919	0.493244	1.40962
-10	0.626224	-0.260298	1.38166	-0.114956	-0.695308	-0.106525	-1.82262	1.05949	0.650222	0.927702	-0.120605	0.0689141	0.418508	-0.0069166	0.0723057	1.40636	2.08656	-0.329952	0.394895	0.612111	-0.736066	-1.74497	1.12414	0.606417	0.182002	0.206808	1.61508	0.163784	0.741555	0.451428	0.408634	0.518131	2.80973	-0.294062	-1.34625	-0.0437561	-0.0353689	-0.112562	0.858438	-0.0943493	-0.348059	0.0499489	-0.501915	0.460043	0.143482	3.18932	-0.0263415	0.446173	2.54367
-8	0.704275	-0.54705	1.36737	-0.135576	-0.436862	-0.528344	-1.48459	1.09751	0.63196	0.785567	-0.258431	0.152266	0.431071	0.104207	0.0353622	1.41311	2.028	-0.496976	0.467047	0.685776	-0.589623	-1.68044	1.14103	0.716237	0.194771	0.252317	1.78102	0.285451	0.795609	0.666785	0.466383	0.501268	2.99799	-0.424213	-1.47169	-0.0670296	0.0435999	-0.00973602	0.595986	0.0361022	-0.187775	-0.00383669	-0.610367	0.460551	0.0989668	3.13005	-0.0203029	0.358647	3.53372
-6	0.746986	-0.738732	1.33184	-0.1514	-0.158685	-0.963252	-1.03149	1.11221	0.606251	0.641841	-0.336319	0.261688	0.473843	0.237685	-0.0153214	1.38654	1.95196	-0.553111	0.532981	0.752718	-0.461282	-1.53924	1.11092	0.827729	0.190086	0.303444	1.89723	0.396069	0.82742	0.820733	0.490662	0.46288	3.16572	-0.558051	-1.54674	-0.0934228	0.184004	0.0901296	0.28713	0.178382	-0.0156745	-0.05526	-0.692928	0.441216	0.041694	3.04699	-0.0145777	0.23644	4.26654
-4	0.74577	-0.802566	1.27221	-0.152582	0.115003	-1.33927	-0.539766	1.10596	0.579637	0.515268	-0.347381	0.381464	0.54949	0.382252	-0.0773363	1.32464	1.85045	-0.490445	0.585913	0.802235	-0.358032	-1.29867	1.01294	0.920788	0.170412	0.367365	1.95422	0.489315	0.841502	0.891387	0.48278	0.417135	3.32107	-0.697208	-1.56918	-0.1253	0.357874	0.181705	-0.0501371	0.324977	0.160332	-0.110379	-0.737228	0.404906	-0.0166103	2.9487	-0.00983822	0.0928928	4.65966
-2	0.700873	-0.7359	1.18648	-0.131464	0.363618	-1.6037	-0.0869283	1.07687	0.558866	0.414109	-0.293977	0.495472	0.657274	0.529293	-0.141579	1.22945	1.71025	-0.311486	0.620741	0.823041	-0.282007	-0.94154	0.826621	0.979549	0.141429	0.448002	1.95106	0.563388	0.842491	0.870186	0.453649	0.377416	3.47459	-0.839156	-1.54355	-0.162074	0.531599	0.260315	-0.386877	0.46754	0.333679	-0.173248	-0.738714	0.356639	-0.0644028	2.84478	-0.00637115	-0.0528854	4.6681
0	0.620684	-0.570061	1.07546	-0.0854185	0.574582	-1.73255	0.265526	1.02075	0.550353	0.336989	-0.186441	0.590841	0.7874	0.675151	-0.194368	1.10868	1.51934	-0.0280251	0.634421	0.811206	-0.229926	-0.463617	0.547495	0.996719	0.111189	0.5444	1.89704	0.620575	0.835365	0.763526	0.418066	0.352098	3.63383	-0.975852	-1.4803	-0.200559	0.674208	0.323099	-0.686835	0.597271	0.499564	-0.243513	-0.700429	0.302306	-0.0935682	2.74388	-0.0037942	-0.179995	4.28503
2	0.519521	-0.362078	0.944099	-0.0177966	0.744656	-1.73128	0.48503	0.931117	0.55919	0.277075	-0.0403491	0.660587	0.91983	0.820689	-0.221409	0.975451	1.27282	0.337656	0.625548	0.774821	-0.194598	0.118137	0.197142	0.974675	0.0885413	0.650141	1.80989	0.665787	0.825432	0.59126	0.388738	0.342354	3.80055	-1.09471	-1.39377	-0.234888	0.764386	0.369122	-0.91381	0.704614	0.654287	-0.315871	-0.631134	0.247424	-0.101452	2.65319	-0.00100318	-0.270849	3.53935
4	0.414737	-0.177111	0.801414	0.0632451	0.877767	-1.62862	0.572198	0.799373	0.587929	0.226757	0.126737	0.704493	1.02924	0.967862	-0.212531	0.846481	0.976109	0.752003	0.593358	0.732115	-0.167523	0.760867	-0.178406	0.92333	0.0811099	0.753876	1.7114	0.704481	0.817875	0.381758	0.372102	0.342959	3.97155	-1.1812	-1.29952	-0.256548	0.794165	0.3982	-1.04092	0.778828	0.79374	-0.381291	-0.542642	0.196162	-0.0909283	2.57821	0.00357813	-0.315862	2.49275
6	0.323772	-0.0682779	0.658851	0.147269	0.980258	-1.46646	0.555479	0.617476	0.635743	0.180761	0.297928	0.727908	1.09393	1.11479	-0.165538	0.738839	0.644352	1.17282	0.536968	0.703623	-0.141258	1.39948	-0.521576	0.856123	0.0932964	0.840915	1.62208	0.740436	0.816916	0.164794	0.36684	0.345665	4.14134	-1.22183	-1.21221	-0.255414	0.768527	0.409215	-1.05832	0.808432	0.91185	-0.429298	-0.447238	0.150682	-0.0685807	2.52103	0.0114993	-0.31621	1.23635
8	0.261299	-0.0615441	0.527798	0.224218	1.05559	-1.28824	0.479297	0.38359	0.698386	0.137351	0.458391	0.738751	1.10388	1.2521	-0.087483	0.666259	0.299029	1.55592	0.455679	0.702356	-0.110615	1.96032	-0.781213	0.785968	0.124968	0.895746	1.55657	0.77401	0.825025	-0.0351814	0.36479	0.343396	4.30434	-1.20678	-1.14422	-0.222297	0.701762	0.399218	-0.975961	0.783259	0.999971	-0.450453	-0.355909	0.110853	-0.041924	2.47724	0.0236942	-0.283692	-0.114847
10	0.23657	-0.15116	0.417375	0.286254	1.10065	-1.12849	0.390829	0.108171	0.768936	0.0984893	0.595572	0.743618	1.06382	1.36312	0.00741687	0.635914	-0.03658	1.86326	0.350513	0.727087	-0.0726088	2.38093	-0.92704	0.722507	0.171421	0.905272	1.5212	0.801476	0.842683	-0.202792	0.353432	0.333121	4.45468	-1.13171	-1.10489	-0.15265	0.612379	0.36434	-0.820341	0.697861	1.04786	-0.438412	-0.27769	0.0744121	-0.0169392	2.43296	0.0399987	-0.237526	-1.43213
12	0.251232	-0.306661	0.333425	0.328431	1.10521	-1.00607	0.329767	-0.183488	0.838801	0.069718	0.69905	0.744375	0.989709	1.42899	0.102513	0.646601	-0.341469	2.06872	0.226323	0.762454	-0.0258187	2.62742	-0.954622	0.671128	0.22481	0.862273	1.51381	0.815808	0.869008	-0.331304	0.319225	0.316044	4.5841	-0.999127	-1.09962	-0.0500249	0.518311	0.302469	-0.626661	0.555016	1.04617	-0.391284	-0.219898	0.0376875	0.00308586	2.36466	0.0589453	-0.198887	-2.58848
14	0.298342	-0.487681	0.278835	0.348492	1.05462	-0.922777	0.322912	-0.454936	0.898565	0.0594504	0.760808	0.73668	0.90088	1.43667	0.184056	0.688916	-0.599617	2.15879	0.0932137	0.786289	0.0299337	2.70181	-0.880281	0.633372	0.276563	0.768273	1.52566	0.808743	0.903058	-0.418919	0.25132	0.295292	4.68013	-0.819103	-1.1284	0.072628	0.433409	0.216512	-0.430025	0.36764	0.98953	-0.312191	-0.188536	-0.00316497	0.0171914	2.24378	0.0779364	-0.18484	-3.47713
16	0.363323	-0.659811	0.254506	0.346293	0.934866	-0.867849	0.382989	-0.667745	0.938774	0.0767581	0.776146	0.711254	0.811979	1.38605	0.244837	0.747336	-0.801178	2.12928	-0.0338046	0.780804	0.0929931	2.63646	-0.730178	0.608046	0.319808	0.63469	1.54466	0.773472	0.945188	-0.464334	0.145083	0.272665	4.72711	-0.609233	-1.1841	0.195216	0.365363	0.116503	-0.258965	0.157898	0.879102	-0.209022	-0.188131	-0.0507204	0.0254247	2.04529	0.093803	-0.203686	-4.0288
18	0.427124	-0.80486	0.259968	0.32326	0.737889	-0.825974	0.510163	-0.792286	0.951145	0.127392	0.744669	0.657583	0.728379	1.2922	0.28487	0.803487	-0.942455	1.98153	-0.137167	0.741882	0.158535	2.47964	-0.529472	0.592405	0.350799	0.481403	1.55929	0.707059	0.997687	-0.464307	0.00446524	0.246408	4.71058	-0.393212	-1.25194	0.296197	0.314914	0.0192019	-0.132764	-0.0466128	0.723359	-0.0933732	-0.220673	-0.105113	0.0275245	1.75741	0.103646	-0.253381	-4.22269
20	0.47093	-0.921966	0.293051	0.282026	0.465297	-0.785087	0.694917	-0.815153	0.930417	0.2094	0.67056	0.568581	0.646676	1.18099	0.309386	0.839518	-1.025	1.72207	-0.200393	0.681157	0.21743	2.2795	-0.295805	0.58301	0.368856	0.332665	1.56179	0.611879	1.06422	-0.414725	-0.157935	0.211306	4.62379	-0.197823	-1.31119	0.35971	0.276375	-0.0549589	-0.0617539	-0.218573	0.536835	0.0212031	-0.284092	-0.163574	0.0224073	1.38763	0.105739	-0.323544	-4.08807
22	0.480945	-1.02053	0.348867	0.226191	0.129256	-0.740238	0.9215	-0.740278	0.876201	0.310861	0.561696	0.444101	0.558993	1.07959	0.325599	0.840654	-1.05416	1.3666	-0.211765	0.618997	0.256562	2.07296	-0.0382873	0.576054	0.375171	0.211468	1.54988	0.495721	1.14822	-0.314589	-0.323725	0.161026	4.47247	-0.0485097	-1.33944	0.381006	0.239579	-0.0866118	-0.0485988	-0.336841	0.337335	0.121382	-0.371075	-0.220846	0.00868866	0.962152	0.100192	-0.400121	-3.69564
24	0.45159	-1.10961	0.419036	0.160121	-0.249461	-0.692214	1.17114	-0.58436	0.793587	0.41179	0.427877	0.291676	0.458211	1.00604	0.3398	0.796644	-1.03751	0.945271	-0.166966	0.571459	0.26138	1.88167	0.239331	0.567238	0.37133	0.134327	1.526	0.370597	1.25097	-0.170649	-0.473804	0.0915008	4.27505	0.035672	-1.31828	0.367501	0.193092	-0.0622984	-0.089025	-0.390811	0.142764	0.196201	-0.469022	-0.270319	-0.0141439	0.518053	0.0891075	-0.470677	-3.14123
26	0.386036	-1.18974	0.492123	0.0887182	-0.64506	-0.642659	1.42417	-0.370162	0.691625	0.490151	0.278967	0.124124	0.341349	0.962498	0.355668	0.702472	-0.983522	0.504363	-0.0701785	0.537932	0.220393	1.71353	0.533622	0.551494	0.358422	0.108292	1.49444	0.250504	1.37043	0.000125756	-0.593723	0.00368674	4.05726	0.0465272	-1.23779	0.33479	0.127875	0.0219092	-0.171961	-0.382077	-0.0313637	0.238674	-0.56138	-0.305465	-0.0446443	0.0914806	0.0761171	-0.528162	-2.52556
28	0.294149	-1.25101	0.555625	0.0171709	-1.03039	-0.589425	1.66048	-0.121566	0.5801	0.529528	0.123703	-0.0447838	0.209998	0.935086	0.373843	0.558963	-0.900822	0.100668	0.0663658	0.496281	0.130198	1.56654	0.836779	0.523051	0.337017	0.130956	1.45752	0.148589	1.50155	0.172083	-0.677033	-0.0955509	3.84329	-0.0107042	-1.09774	0.299489	0.040204	0.158693	-0.280216	-0.323059	-0.173274	0.246591	-0.630117	-0.321185	-0.079087	-0.292964	0.0653887	-0.571825	-1.93493
30	0.188903	-1.27846	0.598966	-0.0493152	-1.37952	-0.525517	1.85896	0.137846	0.466298	0.524853	-0.0305704	-0.20448	0.0687459	0.900169	0.392357	0.373478	-0.79814	-0.210813	0.224189	0.408704	-0.000926917	1.43292	1.13398	0.476263	0.307712	0.192756	1.41263	0.0743027	1.63793	0.316381	-0.72525	-0.194707	3.64795	-0.117686	-0.904892	0.272334	-0.0671704	0.329824	-0.392787	-0.233123	-0.275458	0.222478	-0.658806	-0.314777	-0.112197	-0.627168	0.0604299	-0.60542	-1.427
32	0.082834	-1.2615	0.616292	-0.105826	-1.66934	-0.44272	1.99732	0.383942	0.353531	0.483492	-0.177483	-0.349649	-0.0764785	0.834065	0.40758	0.160177	-0.684473	-0.391278	0.381548	0.23616	-0.152501	1.30251	1.4038	0.407136	0.271596	0.280013	1.35193	0.0312889	1.77406	0.408484	-0.744738	-0.280422	3.47359	-0.246504	-0.668208	0.254673	-0.185878	0.508553	-0.488808	-0.133491	-0.334944	0.172939	-0.63565	-0.286466	-0.138699	-0.917229	0.0630527	-0.633993	-1.02467
34	-0.0142757	-1.20302	0.607826	-0.1481	-1.88079	-0.338141	2.05376	0.591779	0.241989	0.421358	-0.31116	-0.479373	-0.218719	0.722084	0.415486	-0.0610741	-0.569044	-0.428544	0.517249	-0.0448055	-0.295022	1.16536	1.62186	0.314975	0.230245	0.377271	1.26489	0.0166591	1.90687	0.434766	-0.742188	-0.340677	3.31315	-0.365658	-0.395107	0.239627	-0.30435	0.664053	-0.551874	-0.0425619	-0.353591	0.107643	-0.555836	-0.239497	-0.155055	-1.17609	0.0728092	-0.660988	-0.7193
36	-0.0960767	-1.12332	0.579141	-0.172945	-2.00094	-0.220094	2.0106	0.738187	0.130934	0.356116	-0.426218	-0.594085	-0.349062	0.563449	0.41312	-0.267705	-0.460808	-0.33933	0.614601	-0.429852	-0.396151	1.01271	1.76656	0.203259	0.185279	0.468448	1.1428	0.0220099	2.03572	0.395684	-0.720767	-0.367379	3.15726	-0.44697	-0.0910236	0.216904	-0.410957	0.767583	-0.57318	0.0269399	-0.338121	0.0380972	-0.422576	-0.179816	-0.160666	-1.41537	0.0870467	-0.686918	-0.481812
38	-0.159155	-1.05659	0.538688	-0.17873	-2.02568	-0.109791	1.85838	0.807223	0.0205449	0.300628	-0.518531	-0.692067	-0.455822	0.370776	0.399931	-0.438909	-0.367654	-0.163219	0.664527	-0.883883	-0.428126	0.835771	1.825	0.079161	0.137927	0.53735	0.982885	0.035937	2.16082	0.304534	-0.67842	-0.357831	3.00093	-0.471441	0.237726	0.178696	-0.497032	0.799269	-0.552542	0.0684103	-0.299264	-0.0237709	-0.246505	-0.115272	-0.158029	-1.64037	0.101565	-0.709874	-0.277941
40	-0.202197	-1.04043	0.494772	-0.165896	-1.96176	-0.0369998	1.59857	0.796383	-0.0876184	0.259161	-0.58657	-0.767332	-0.525355	0.165171	0.378506	-0.560154	-0.295653	0.0484154	0.666867	-1.34817	-0.374184	0.622621	1.7969	-0.0481951	0.0889607	0.568582	0.790016	0.0472617	2.28103	0.182613	-0.608874	-0.315034	2.84608	-0.432337	0.5802	0.123985	-0.559119	0.753507	-0.497397	0.0799969	-0.249711	-0.0672167	-0.043541	-0.0543413	-0.151768	-1.84964	0.111736	-0.727181	-0.0823886
42	-0.225486	-1.10232	0.453397	-0.137388	-1.82647	-0.0305145	1.24366	0.720487	-0.191315	0.227262	-0.632627	-0.809987	-0.544977	-0.0304757	0.35424	-0.62604	-0.248561	0.24401	0.629414	-1.75499	-0.232149	0.354708	1.6952	-0.169969	0.0390764	0.549542	0.575023	0.0479281	2.39213	0.0530303	-0.505044	-0.246985	2.69881	-0.334655	0.919419	0.0595475	-0.599951	0.640866	-0.420472	0.0627685	-0.201213	-0.0843158	0.168126	-0.00453214	-0.146954	-2.03791	0.113814	-0.737081	0.112805
44	-0.230899	-1.24831	0.417757	-0.0987232	-1.64395	-0.106799	0.815205	0.610567	-0.288491	0.19464	-0.662957	-0.809012	-0.507153	-0.197263	0.333758	-0.640422	-0.227567	0.380602	0.564885	-2.04522	-0.0144438	0.0056259	1.54307	-0.279378	-0.0105812	0.473309	0.350388	0.0347008	2.48681	-0.0643739	-0.363827	-0.165101	2.56339	-0.191398	1.23501	-0.00250878	-0.627792	0.485396	-0.336731	0.0197106	-0.161856	-0.0713579	0.370988	0.0291255	-0.147404	-2.19981	0.106097	-0.739507	0.297799
46	-0.222077	-1.45897	0.389031	-0.0574308	-1.43887	-0.261414	0.341459	0.506541	-0.377491	0.149634	-0.686121	-0.756431	-0.413335	-0.323441	0.322315	-0.613863	-0.231312	0.428789	0.486681	-2.18404	0.255054	-0.455716	1.3682	-0.372444	-0.058133	0.341349	0.125494	0.0092787	2.55629	-0.155399	-0.190612	-0.0818342	2.43704	-0.0182485	1.50895	-0.0494734	-0.654146	0.318025	-0.259898	-0.04411	-0.134678	-0.0296498	0.550384	0.0449681	-0.154601	-2.33219	0.0895285	-0.735698	0.451159
48	-0.204309	-1.69473	0.367331	-0.021705	-1.2301	-0.467041	-0.144742	0.44462	-0.456551	0.0838093	-0.709679	-0.651289	-0.275876	-0.404765	0.320912	-0.559613	-0.256355	0.374663	0.404647	-2.1702	0.546135	-1.05679	1.196	-0.447779	-0.10112	0.164621	-0.0962224	-0.0230333	2.59303	-0.211095	-0.0013941	-0.00777039	2.30872	0.171126	1.7312	-0.073029	-0.69031	0.168399	-0.198871	-0.121009	-0.118186	0.0345535	0.695633	0.0445639	-0.167575	-2.43418	0.0674726	-0.727111	0.549019
50	-0.18383	-1.90882	0.351764	0.00151743	-1.027	-0.67918	-0.607995	0.442977	-0.523091	-0.00458817	-0.736521	-0.501995	-0.117205	-0.443043	0.324274	-0.489776	-0.298274	0.220072	0.322193	-2.03597	0.828111	-1.80928	1.04332	-0.505879	-0.13701	-0.0378736	-0.316751	-0.0555847	2.59307	-0.225932	0.179221	0.0510611	2.16266	0.367302	1.90181	-0.0724749	-0.743742	0.0579529	-0.154752	-0.20106	-0.108415	0.111112	0.800346	0.0315814	-0.183551	-2.50572	0.044653	-0.714483	0.573059
52	-0.166697	-2.06234	0.339589	0.00848441	-0.829497	-0.847211	-1.01358	0.491269	-0.573275	-0.109366	-0.762766	-0.326157	0.033743	-0.444131	0.320974	-0.413138	-0.353126	-0.0181431	0.235771	-1.83723	1.07538	-2.69631	0.914853	-0.548408	-0.163794	-0.243006	-0.539859	-0.0829001	2.55678	-0.196323	0.324364	0.0946367	1.98457	0.564185	2.02815	-0.0548968	-0.81547	-0.00376273	-0.119575	-0.274092	-0.101342	0.187964	0.862251	0.0101737	-0.198891	-2.54571	0.0256062	-0.697676	0.514619
54	-0.15765	-2.13531	0.325495	-0.000180393	-0.631412	-0.926322	-1.33249	0.549614	-0.601993	-0.218011	-0.778707	-0.147944	0.147155	-0.416235	0.296513	-0.335158	-0.41849	-0.310209	0.136991	-1.63649	1.27175	-3.66416	0.803435	-0.577597	-0.180448	-0.42871	-0.765996	-0.102756	2.48754	-0.120747	0.413689	0.128273	1.76705	0.755825	2.11899	-0.0322842	-0.899483	-0.019059	-0.0776711	-0.332768	-0.0943735	0.25362	0.882745	-0.0163566	-0.209756	-2.55102	0.0132293	-0.676328	0.374671
56	-0.159433	-2.1289	0.302316	-0.0195817	-0.424727	-0.886201	-1.54715	0.559578	-0.603154	-0.315978	-0.772829	0.00628389	0.198896	-0.36865	0.239009	-0.259589	-0.493095	-0.617498	0.0166018	-1.4843	1.41238	-4.62344	0.694876	-0.595659	-0.187104	-0.578687	-0.988215	-0.117181	2.38892	-0.00145244	0.441037	0.159769	1.51176	0.932912	2.17889	-0.0169002	-0.984487	0.000738325	-0.00982539	-0.375219	-0.0863032	0.299591	0.866179	-0.0460366	-0.212271	-2.51681	0.00799551	-0.650694	0.161281
58	-0.17275	-2.0589	0.263626	-0.0420346	-0.203251	-0.714807	-1.65477	0.464397	-0.570371	-0.392153	-0.737228	0.112968	0.176493	-0.310686	0.145583	-0.19041	-0.574811	-0.898852	-0.131248	-1.40553	1.50223	-5.46287	0.575745	-0.604118	-0.184935	-0.685096	-1.19116	-0.131988	2.26206	0.153382	0.417499	0.195331	1.2277	1.08105	2.20612	-0.0169381	-1.05745	0.0394701	0.100608	-0.405696	-0.0761137	0.322066	0.818951	-0.0778078	-0.20241	-2.43829	0.00812713	-0.621912	-0.11321
60	-0.196675	-1.94428	0.207283	-0.0594482	0.0349108	-0.418338	-1.66591	0.230779	-0.498326	-0.443095	-0.671859	0.155945	0.0828448	-0.25065	0.0264613	-0.13281	-0.657937	-1.11829	-0.306128	-1.39529	1.55109	-6.07402	0.440851	-0.603251	-0.175762	-0.748602	-1.35393	-0.154926	2.10485	0.328613	0.368199	0.236003	0.927249	1.18209	2.19472	-0.0342732	-1.10764	0.0803199	0.261294	-0.432732	-0.061807	0.322389	0.748631	-0.110696	-0.17616	-2.31316	0.0106029	-0.591338	-0.433719
62	-0.229156	-1.79717	0.137995	-0.0657644	0.285577	-0.0196468	-1.5976	-0.13672	-0.385137	-0.473945	-0.585605	0.129877	-0.0637751	-0.195096	-0.0959013	-0.0926466	-0.731614	-1.25226	-0.500784	-1.42496	1.56673	-6.3802	0.296514	-0.592023	-0.16149	-0.776118	-1.45583	-0.193087	1.91384	0.503347	0.323828	0.27626	0.622072	1.2182	2.1386	-0.0650592	-1.12968	0.109173	0.466151	-0.465568	-0.0404707	0.306252	0.663459	-0.143202	-0.130418	-2.14444	0.0125366	-0.559288	-0.782625
64	-0.267364	-1.61926	0.067157	-0.0585984	0.537166	0.443575	-1.46398	-0.594577	-0.235426	-0.495437	-0.493749	0.0419199	-0.233918	-0.148627	-0.193442	-0.0747201	-0.780975	-1.29413	-0.702803	-1.45526	1.54923	-6.35946	0.157347	-0.568825	-0.143566	-0.777324	-1.48282	-0.250567	1.68825	0.654536	0.310083	0.305471	0.320773	1.17718	2.03467	-0.102575	-1.12438	0.116862	0.693864	-0.510369	-0.010057	0.281939	0.572299	-0.173253	-0.0645952	-1.94269	0.0123431	-0.524032	-1.13983
66	-0.307907	-1.40571	0.00946285	-0.0395762	0.770584	0.921474	-1.26964	-1.07233	-0.062979	-0.518503	-0.41318	-0.0889228	-0.394243	-0.114245	-0.242752	-0.0807175	-0.791201	-1.25428	-0.897548	-1.45064	1.48959	-6.05247	0.037819	-0.532863	-0.122718	-0.761185	-1.43188	-0.327268	1.43389	0.762001	0.33886	0.311613	0.0286911	1.05669	1.88349	-0.140755	-1.09742	0.100284	0.910498	-0.567624	0.0278184	0.258123	0.48472	-0.19859	0.0177056	-1.72709	0.0102455	-0.481766	-1.48414
68	-0.347099	-1.15345	-0.0224926	-0.0133959	0.961696	1.35714	-1.00971	-1.49227	0.108669	-0.549159	-0.35753	-0.235058	-0.515389	-0.0937521	-0.234574	-0.107712	-0.752913	-1.15542	-1.0712	-1.38985	1.37348	-5.55146	-0.0567901	-0.485537	-0.0991947	-0.733514	-1.31151	-0.419146	1.16477	0.813249	0.40423	0.285587	-0.250772	0.865657	1.68789	-0.176666	-1.0566	0.0624031	1.07591	-0.631398	0.065709	0.24169	0.41062	-0.217162	0.107961	-1.52409	0.00798761	-0.427734	-1.7966
70	-0.38137	-0.868818	-0.0233037	0.0139021	1.08691	1.69484	-0.67761	-1.78916	0.249063	-0.586074	-0.334072	-0.365892	-0.577633	-0.0876717	-0.177834	-0.147835	-0.666334	-1.02446	-1.21313	-1.26972	1.18842	-4.97313	-0.134434	-0.430968	-0.0734587	-0.696136	-1.13854	-0.519545	0.901393	0.806319	0.484549	0.224311	-0.514315	0.62254	1.45176	-0.210822	-1.00922	0.011086	1.15252	-0.690398	0.0905631	0.235994	0.35908	-0.227249	0.193721	-1.36277	0.00794295	-0.358004	-2.0647
72	-0.407707	-0.570431	0.00274612	0.0367793	1.13047	1.88991	-0.276605	-1.92402	0.327095	-0.621565	-0.343042	-0.454586	-0.572706	-0.0945602	-0.0958225	-0.189453	-0.542122	-0.88357	-1.3171	-1.10232	0.931055	-4.42491	-0.212313	-0.375184	-0.0469755	-0.647703	-0.932858	-0.620866	0.666153	0.749447	0.550082	0.131504	-0.7573	0.351495	1.18061	-0.24537	-0.960401	-0.0431727	1.11419	-0.730437	0.0871311	0.239954	0.336737	-0.22734	0.261411	-1.26726	0.0120287	-0.271071	-2.28571
74	-0.423919	-0.286073	0.0428537	0.0515886	1.09038	1.9172	0.171074	-1.88943	0.319014	-0.645001	-0.378902	-0.484111	-0.502165	-0.110333	-0.0158901	-0.219853	-0.398455	-0.743638	-1.38131	-0.907966	0.61107	-3.97561	-0.306503	-0.324187	-0.0225449	-0.585619	-0.712862	-0.715924	0.477957	0.657461	0.57374	0.0162413	-0.97321	0.0782565	0.883792	-0.281246	-0.912791	-0.0902508	0.953175	-0.73781	0.0436665	0.248353	0.346467	-0.21608	0.300112	-1.24844	0.0208582	-0.168609	-2.46714
76	-0.428644	-0.0455571	0.0799971	0.0572336	0.979896	1.77512	0.622756	-1.70736	0.215337	-0.646731	-0.432514	-0.450752	-0.374311	-0.128558	0.0425039	-0.228874	-0.255842	-0.602428	-1.4072	-0.707862	0.250594	-3.63961	-0.420862	-0.281768	-0.00378424	-0.508159	-0.493543	-0.79879	0.348066	0.546137	0.541266	-0.109766	-1.15418	-0.172841	0.576819	-0.315959	-0.867154	-0.123261	0.683196	-0.702978	-0.0424447	0.253456	0.387052	-0.192527	0.304944	-1.29859	0.0334176	-0.0551562	-2.62391
78	-0.421243	0.127283	0.0986242	0.0551149	0.823404	1.48433	1.02297	-1.4222	0.0239509	-0.620897	-0.493309	-0.363966	-0.201738	-0.14229	0.0755768	-0.212288	-0.132003	-0.447939	-1.3974	-0.519222	-0.120305	-3.37884	-0.54156	-0.248107	0.00616934	-0.415845	-0.287298	-0.865273	0.278418	0.426806	0.457066	-0.234925	-1.29249	-0.380479	0.281594	-0.343347	-0.823152	-0.140215	0.337952	-0.623688	-0.161853	0.247561	0.453781	-0.156679	0.278688	-1.3922	0.0473178	0.062949	-2.77311
80	-0.401824	0.220814	0.0896684	0.0485411	0.648621	1.0825	1.31742	-1.09163	-0.231739	-0.566521	-0.550974	-0.242806	-0.000259948	-0.147051	0.0950676	-0.173434	-0.0386149	-0.265688	-1.35329	-0.354117	-0.469938	-3.12099	-0.640625	-0.219826	0.00616513	-0.311581	-0.105871	-0.913215	0.262404	0.303542	0.343192	-0.349693	-1.38271	-0.527389	0.0234431	-0.355536	-0.779858	-0.143785	-0.0349479	-0.506495	-0.294854	0.225616	0.539332	-0.109921	0.230937	-1.49325	0.0594661	0.178782	-2.92827
82	-0.371486	0.238687	0.0533058	0.0418084	0.478659	0.617963	1.46803	-0.77644	-0.518723	-0.487102	-0.596536	-0.110288	0.211711	-0.143473	0.120532	-0.12222	0.0196628	-0.047276	-1.27317	-0.220817	-0.77117	-2.78819	-0.687019	-0.191422	-0.0020281	-0.199725	0.0387949	-0.942578	0.287314	0.174252	0.231643	-0.447368	-1.42377	-0.60178	-0.174343	-0.346039	-0.735943	-0.139287	-0.383573	-0.365876	-0.417078	0.186895	0.634213	-0.0550815	0.175058	-1.56612	0.0668933	0.285649	-3.09483
84	-0.332661	0.199476	-0.00128791	0.0391072	0.327602	0.144422	1.46368	-0.529852	-0.801882	-0.389431	-0.622908	0.0123567	0.414929	-0.137896	0.168421	-0.0718322	0.0446194	0.202715	-1.15172	-0.125151	-1.00605	-2.32758	-0.659959	-0.157449	-0.0139055	-0.0848514	0.13603	-0.955057	0.337447	0.0350946	0.152949	-0.523893	-1.42026	-0.599346	-0.296459	-0.312161	-0.689683	-0.131812	-0.662754	-0.221049	-0.506973	0.135161	0.7267	0.00401972	0.124113	-1.58506	0.0674867	0.377335	-3.2685
86	-0.289268	0.133045	-0.0590696	0.0433967	0.201088	-0.28292	1.32335	-0.38721	-1.05041	-0.282326	-0.625031	0.109859	0.592928	-0.139928	0.243796	-0.034623	0.043333	0.463834	-0.981585	-0.0698591	-1.16813	-1.73469	-0.558245	-0.11456	-0.0235166	0.0289926	0.179665	-0.953105	0.397132	-0.113982	0.1257	-0.577012	-1.38221	-0.525053	-0.339739	-0.255262	-0.63889	-0.123743	-0.843935	-0.0915768	-0.552045	0.0774203	0.803041	0.0632596	0.0872712	-1.53866	0.0604656	0.448052	-3.4369
88	-0.24646	0.0741782	-0.104276	0.0554309	0.100778	-0.611242	1.0907	-0.358417	-1.24149	-0.175782	-0.599767	0.174762	0.736417	-0.157729	0.338749	-0.0189063	0.0268969	0.70217	-0.756696	-0.0519782	-1.26216	-1.06174	-0.40161	-0.0627184	-0.0253186	0.138187	0.171008	-0.938596	0.453217	-0.265524	0.151191	-0.605185	-1.32347	-0.393434	-0.313996	-0.178807	-0.580643	-0.113538	-0.920964	0.00655256	-0.551413	0.02197	0.848879	0.11878	0.0679346	-1.42837	0.0465361	0.492571	-3.58428
90	-0.209885	0.0546948	-0.126063	0.0732088	0.0297505	-0.795963	0.821716	-0.426445	-1.3612	-0.0806555	-0.545812	0.20715	0.846071	-0.193269	0.437584	-0.0275796	0.009002	0.877853	-0.47663	-0.0604608	-1.301	-0.406461	-0.223887	-0.00525825	-0.0158238	0.238852	0.1196	-0.91175	0.496774	-0.404802	0.215012	-0.606706	-1.25897	-0.226534	-0.239397	-0.0856413	-0.510637	-0.096044	-0.909831	0.0631704	-0.514063	-0.0234188	0.852252	0.167197	0.0640138	-1.26371	0.0277312	0.50686	-3.69774
92	-0.18463	0.0961696	-0.122747	0.0921481	-0.00430481	-0.809247	0.569185	-0.554034	-1.4037	-0.00848132	-0.463874	0.21306	0.931568	-0.2403	0.525059	-0.0584561	0.00424798	0.955847	-0.150417	-0.0768309	-1.30053	0.116675	-0.0611904	0.0520887	0.00556718	0.326264	0.041035	-0.870942	0.523834	-0.514153	0.294361	-0.579445	-1.20212	-0.0496181	-0.141458	0.0233627	-0.422314	-0.0641035	-0.842136	0.0743844	-0.454032	-0.0526821	0.807367	0.205522	0.069887	-1.05771	0.0069873	0.489111	-3.77207
94	-0.174101	0.205563	-0.102971	0.106144	0.0101565	-0.64944	0.368743	-0.69725	-1.37019	0.029452	-0.357278	0.202327	1.00651	-0.286438	0.5926	-0.105597	0.0261622	0.916724	0.201854	-0.0800764	-1.2739	0.414543	0.0600814	0.1028	0.0367435	0.394976	-0.0470989	-0.813599	0.535068	-0.579404	0.367566	-0.521469	-1.16281	0.114218	-0.0453757	0.147978	-0.306493	-0.010968	-0.75415	0.0421358	-0.385	-0.0619679	0.717521	0.231097	0.079023	-0.82502	-0.0124584	0.440657	-3.81083
96	-0.179185	0.375165	-0.0831006	0.109322	0.0842178	-0.347588	0.231436	-0.820838	-1.26822	0.0244683	-0.232871	0.186251	1.08121	-0.318528	0.639216	-0.161038	0.0848529	0.7636	0.550862	-0.054104	-1.22718	0.449091	0.131182	0.141256	0.0738378	0.43986	-0.129196	-0.737803	0.534476	-0.595153	0.421684	-0.432445	-1.14685	0.248803	0.0287126	0.285102	-0.152605	0.0670907	-0.674959	-0.0261814	-0.316598	-0.0497572	0.595465	0.241833	0.0862263	-0.582297	-0.0277311	0.366201	-3.82252
98	-0.197968	0.586458	-0.0815931	0.0978984	0.222768	0.0333972	0.145515	-0.908886	-1.11117	-0.0259402	-0.101705	0.175198	1.15668	-0.328486	0.667447	-0.216649	0.184123	0.522327	0.863497	0.00609445	-1.15837	0.253314	0.16272	0.164055	0.112454	0.457733	-0.193853	-0.643798	0.527381	-0.566203	0.455187	-0.315265	-1.15648	0.347304	0.0685833	0.425253	0.047829	0.168725	-0.617568	-0.117897	-0.253573	-0.0169133	0.460537	0.23675	0.088851	-0.348736	-0.0369042	0.273151	-3.81386
100	-0.226127	0.815868	-0.112379	0.0713329	0.420044	0.409529	0.0865943	-0.966387	-0.916654	-0.114963	0.0212355	0.176375	1.22284	-0.316568	0.677763	-0.265891	0.318229	0.234554	1.11063	0.0933151	-1.06027	-0.0779372	0.180325	0.170669	0.148645	0.448935	-0.233962	-0.534648	0.518206	-0.50453	0.475069	-0.177066	-1.19151	0.41128	0.0706792	0.551734	0.296063	0.286779	-0.57581	-0.215844	-0.197311	0.0332479	0.333319	0.216576	0.0868399	-0.144603	-0.0393829	0.170284	-3.78412
102	-0.257835	1.03992	-0.179723	0.0322254	0.658309	0.695364	0.0315885	-1.01171	-0.703519	-0.225982	0.118848	0.192341	1.26209	-0.290562	0.665553	-0.304981	0.469502	-0.0537369	1.27471	0.193277	-0.926356	-0.419451	0.216152	0.163461	0.179326	0.418151	-0.245562	-0.415756	0.50858	-0.42365	0.490249	-0.0289758	-1.25019	0.44671	0.0390496	0.643809	0.581353	0.409288	-0.527838	-0.30071	-0.148219	0.0950303	0.229798	0.183994	0.0818468	0.0124343	-0.0360072	0.0663062	-3.72439
104	-0.286848	1.23817	-0.276474	-0.0150067	0.91	0.827146	-0.030061	-1.06407	-0.48773	-0.33616	0.175202	0.220993	1.25676	-0.26174	0.622929	-0.332845	0.608969	-0.303627	1.35417	0.293688	-0.756759	-0.657047	0.298739	0.147204	0.202163	0.373979	-0.226834	-0.293552	0.4963	-0.333555	0.504717	0.115563	-1.32933	0.458836	-0.017005	0.683048	0.879167	0.521933	-0.444674	-0.355016	-0.107367	0.160879	0.157286	0.143328	0.075912	0.111357	-0.0288553	-0.031171	-3.62325
106	-0.307365	1.39384	-0.38632	-0.0659618	1.14233	0.781721	-0.0930377	-1.13168	-0.27917	-0.423391	0.179428	0.257299	1.19737	-0.239973	0.544472	-0.349719	0.701818	-0.490166	1.3628	0.392352	-0.561544	-0.722473	0.443539	0.128221	0.215299	0.327119	-0.1781	-0.174037	0.475489	-0.238803	0.513911	0.243257	-1.42354	0.448588	-0.0859665	0.660081	1.15414	0.610982	-0.300747	-0.367552	-0.0766108	0.222571	0.113551	0.0997131	0.0702273	0.149842	-0.0207744	-0.11601	-3.47635
108	-0.314483	1.49342	-0.489225	-0.11763	1.32293	0.584174	-0.141885	-1.20535	-0.0813826	-0.473764	0.128829	0.296184	1.08801	-0.230404	0.433656	-0.355117	0.717332	-0.602766	1.32397	0.499452	-0.359544	-0.608943	0.645951	0.113184	0.217334	0.28759	-0.102699	-0.0618737	0.438045	-0.140254	0.506108	0.343155	-1.52442	0.412727	-0.157104	0.578641	1.36758	0.665651	-0.0829939	-0.336445	-0.0573932	0.272977	0.089136	0.058087	0.0644533	0.133241	-0.0147053	-0.183392	-3.29486
110	-0.304393	1.52666	-0.56811	-0.168649	1.42534	0.301085	-0.162399	-1.25958	0.104933	-0.485982	0.0300273	0.335229	0.946836	-0.232664	0.306261	-0.346502	0.640007	-0.64037	1.26217	0.631893	-0.173026	-0.363599	0.878389	0.10762	0.207812	0.261901	-0.00775936	0.039683	0.376132	-0.0388491	0.468123	0.407669	-1.62084	0.347798	-0.222718	0.455029	1.48713	0.679262	0.204038	-0.269558	-0.0491615	0.307875	0.0715966	0.0223498	0.0568234	0.0715428	-0.0129214	-0.229428	-3.10761
112	-0.274697	1.48786	-0.614368	-0.218448	1.43347	0.0215813	-0.15247	-1.26026	0.276191	-0.470501	-0.102304	0.375748	0.801276	-0.241999	0.188531	-0.319738	0.476834	-0.605052	1.19528	0.801933	-0.0203574	-0.0629297	1.09265	0.114425	0.187976	0.251368	0.0961726	0.128209	0.284987	0.0610591	0.392491	0.432292	-1.70088	0.255493	-0.27907	0.313305	1.49544	0.649336	0.538039	-0.182247	-0.0483838	0.32701	0.0498866	-0.00509271	0.0449235	-0.0234121	-0.0163731	-0.250819	-2.95454
114	-0.225154	1.37815	-0.630102	-0.265893	1.34443	-0.167355	-0.126638	-1.17611	0.421265	-0.443686	-0.248662	0.421646	0.680208	-0.25096	0.110226	-0.271322	0.256814	-0.49795	1.13054	1.00598	0.0904292	0.216824	1.2283	0.132977	0.16124	0.252471	0.197025	0.201416	0.165067	0.150615	0.282635	0.414718	-1.75503	0.145926	-0.325837	0.17831	1.39483	0.577233	0.883174	-0.0936452	-0.0487775	0.333688	0.0174804	-0.0234281	0.0267258	-0.138842	-0.0243712	-0.244695	-2.87335
116	-0.15877	1.20742	-0.626098	-0.308261	1.16875	-0.203457	-0.111992	-0.989726	0.521206	-0.419646	-0.388888	0.476607	0.605965	-0.250693	0.0948639	-0.201252	0.0223451	-0.319492	1.06514	1.22012	0.164765	0.422355	1.22651	0.159466	0.132808	0.259306	0.284001	0.25686	0.0225143	0.21792	0.153673	0.354477	-1.77924	0.0364463	-0.364414	0.0692659	1.20678	0.467903	1.19723	-0.0229436	-0.0427243	0.332833	-0.0264147	-0.0333493	0.00138358	-0.260304	-0.0347969	-0.208667	-2.88472
118	-0.082646	0.994677	-0.616319	-0.341075	0.928184	-0.0633139	-0.137429	-0.704458	0.554528	-0.403403	-0.506143	0.541047	0.588989	-0.231888	0.150642	-0.114918	-0.183841	-0.0731083	0.990419	1.40596	0.220338	0.532151	1.04684	0.188571	0.108291	0.267064	0.34998	0.292238	-0.132463	0.251137	0.028615	0.253786	-1.77606	-0.0536746	-0.395699	-0.00399343	0.966615	0.329878	1.44	0.013434	-0.0232837	0.328241	-0.0775264	-0.0369454	-0.0304927	-0.371211	-0.0448523	-0.141116	-2.98276
120	-0.00772733	0.765686	-0.611259	-0.358899	0.651363	0.234938	-0.221412	-0.344853	0.506221	-0.388386	-0.589762	0.61035	0.626295	-0.186073	0.265458	-0.0228932	-0.330492	0.230309	0.897166	1.52464	0.282084	0.551824	0.682239	0.215857	0.0917814	0.274864	0.392316	0.306104	-0.288813	0.241938	-0.0682747	0.119412	-1.75314	-0.109888	-0.418138	-0.0415177	0.715288	0.175245	1.58158	0.00369271	0.0140208	0.320372	-0.128601	-0.037599	-0.0670184	-0.454448	-0.0521257	-0.0418043	-3.13465
122	0.0531501	0.548322	-0.613267	-0.356743	0.369196	0.639876	-0.36381	0.0492554	0.376423	-0.359481	-0.636309	0.675252	0.703317	-0.107704	0.408213	0.0613851	-0.403746	0.570043	0.780018	1.55238	0.375099	0.502055	0.166802	0.239718	0.0843153	0.28641	0.4117	0.298607	-0.438098	0.188247	-0.118229	-0.0355311	-1.71979	-0.126939	-0.426698	-0.0511111	0.490598	0.0191343	1.60932	-0.0580225	0.0702802	0.305877	-0.17216	-0.0397481	-0.105405	-0.496359	-0.0555533	0.087095	-3.28967
124	0.0886901	0.366933	-0.616066	-0.331559	0.111112	1.08276	-0.545072	0.432765	0.184553	-0.300696	-0.648636	0.724221	0.797743	0.00335258	0.536528	0.125152	-0.405859	0.916712	0.639536	1.48931	0.517674	0.407417	-0.428101	0.261837	0.0835344	0.308074	0.409862	0.271944	-0.576589	0.0956432	-0.112533	-0.191243	-1.68315	-0.109414	-0.413266	-0.0449331	0.320171	-0.121607	1.53226	-0.170531	0.143301	0.2792	-0.202979	-0.0483056	-0.142297	-0.491381	-0.055851	0.239687	-3.39335
126	0.0929052	0.237465	-0.608683	-0.283406	-0.097363	1.49618	-0.732471	0.766152	-0.0334531	-0.204593	-0.633259	0.746877	0.884154	0.140197	0.608778	0.159728	-0.349018	1.23649	0.481868	1.35756	0.716248	0.291857	-1.00983	0.285982	0.0848076	0.345303	0.387536	0.230382	-0.705008	-0.022887	-0.053843	-0.323316	-1.64587	-0.0686236	-0.368601	-0.0361165	0.217779	-0.230616	1.38173	-0.324801	0.228446	0.235551	-0.219387	-0.0676425	-0.17406	-0.444751	-0.0552011	0.405236	-3.40092
128	0.0675929	0.164676	-0.581804	-0.215979	-0.236404	1.8297	-0.890184	1.02413	-0.234195	-0.0795532	-0.597009	0.737042	0.938923	0.289346	0.596614	0.162689	-0.248278	1.49677	0.316785	1.19017	0.963192	0.18123	-1.48856	0.315933	0.0833049	0.399209	0.343907	0.179838	-0.826151	-0.148931	0.0454156	-0.407246	-1.606	-0.0179073	-0.285509	-0.0361621	0.183342	-0.294792	1.20671	-0.503836	0.319816	0.173824	-0.222876	-0.100311	-0.197135	-0.371546	-0.0563251	0.568082	-3.28564
130	0.0222609	0.141922	-0.533308	-0.136407	-0.293965	2.05776	-0.989106	1.20021	-0.379019	0.0488575	-0.544215	0.694208	0.945174	0.433637	0.493747	0.138216	-0.117049	1.67144	0.155437	1.01765	1.23737	0.108074	-1.80154	0.353779	0.0760415	0.465016	0.277882	0.127075	-0.941763	-0.262124	0.166408	-0.42434	-1.55864	0.0313588	-0.162381	-0.053246	0.20582	-0.307021	1.06352	-0.683767	0.411509	0.0981297	-0.216329	-0.145938	-0.208549	-0.292325	-0.0613743	0.709387	-3.04051
132	-0.0286748	0.153202	-0.470235	-0.0543574	-0.268297	2.17789	-1.01346	1.3063	-0.444999	0.14423	-0.475579	0.622908	0.897143	0.556674	0.31791	0.0957223	0.0337432	1.74448	0.00905456	0.859409	1.50693	0.11221	-1.92917	0.399344	0.0629911	0.533037	0.190542	0.0786064	-1.05036	-0.344484	0.287685	-0.367234	-1.49828	0.0716504	-0.00593443	-0.0912229	0.267469	-0.268012	1.00107	-0.836496	0.498838	0.0173343	-0.201863	-0.200806	-0.206442	-0.227259	-0.071135	0.810917	-2.67522
134	-0.0703814	0.176774	-0.406243	0.0194093	-0.169879	2.20132	-0.96326	1.36746	-0.430833	0.172031	-0.389238	0.53044	0.802553	0.647042	0.105304	0.0474288	0.193907	1.71134	-0.11101	0.723282	1.73382	0.233677	-1.89726	0.450625	0.0469158	0.5915	0.0874978	0.0396011	-1.14708	-0.384685	0.388495	-0.243125	-1.42064	0.0989898	0.167994	-0.149139	0.348015	-0.186582	1.04489	-0.933827	0.579231	-0.0571512	-0.179533	-0.25841	-0.190387	-0.190985	-0.0848507	0.859955	-2.211
136	-0.0920393	0.189694	-0.355799	0.0747931	-0.0211966	2.14112	-0.853281	1.41279	-0.355724	0.114177	-0.283656	0.424226	0.681466	0.700525	-0.100409	0.00583625	0.351798	1.57791	-0.19282	0.611142	1.87992	0.499977	-1.76497	0.504405	0.032198	0.629709	-0.0201646	0.0132147	-1.22529	-0.381131	0.451243	-0.0733566	-1.32388	0.11131	0.336375	-0.221373	0.427939	-0.0782045	1.18504	-0.95258	0.652331	-0.114435	-0.147679	-0.310914	-0.161293	-0.189538	-0.100619	0.853508	-1.67518
138	-0.0895378	0.172711	-0.327815	0.10414	0.146708	2.00395	-0.709365	1.46455	-0.252018	-0.0206009	-0.161226	0.310196	0.561121	0.719426	-0.260556	-0.0181721	0.493536	1.3579	-0.224689	0.525145	1.91444	0.913898	-1.6034	0.556364	0.0233079	0.64015	-0.117167	0.000756825	-1.27891	-0.342778	0.463256	0.110855	-1.20942	0.10674	0.473665	-0.298749	0.490833	0.0377634	1.3735	-0.879693	0.718822	-0.147012	-0.104768	-0.35102	-0.12095	-0.219453	-0.11604	0.799785	-1.09578
140	-0.0655293	0.114938	-0.321556	0.103751	0.30064	1.78844	-0.562734	1.52877	-0.154742	-0.195497	-0.0310232	0.192845	0.468003	0.709392	-0.351078	-0.0163939	0.604393	1.06948	-0.198492	0.469785	1.82141	1.44843	-1.47273	0.600728	0.0234799	0.619069	-0.187525	0.00266469	-1.30402	-0.287015	0.418082	0.275509	-1.08265	0.0829125	0.558321	-0.37077	0.525153	0.141397	1.53446	-0.715958	0.778124	-0.152546	-0.0517565	-0.373607	-0.0715093	-0.268548	-0.128758	0.715836	-0.496461
142	-0.0270287	0.0174908	-0.326561	0.0748213	0.412938	1.49022	-0.442686	1.59083	-0.092111	-0.354866	0.0907349	0.0764898	0.419884	0.675328	-0.366499	0.0161069	0.672032	0.732322	-0.114819	0.448763	1.60516	2.05157	-1.40601	0.63024	0.0338861	0.566044	-0.219145	0.0196916	-1.29917	-0.234732	0.316419	0.391745	-0.953163	0.0378384	0.579315	-0.428504	0.525511	0.215354	1.58644	-0.477095	0.82596	-0.134056	0.00636036	-0.376635	-0.0152833	-0.318062	-0.136691	0.622001	0.107202
144	0.0182357	-0.105065	-0.32658	0.0235767	0.467996	1.10985	-0.368889	1.61816	-0.0801569	-0.44112	0.183285	-0.0335816	0.420776	0.6184	-0.317845	0.080391	0.690528	0.365813	0.012598	0.459547	1.29089	2.65868	-1.40403	0.637244	0.0533595	0.483576	-0.20771	0.0533976	-1.26491	-0.203865	0.166401	0.442364	-0.834005	-0.0279866	0.540297	-0.466965	0.49323	0.247463	1.46996	-0.191416	0.853328	-0.0984831	0.0608073	-0.361125	0.0449683	-0.346244	-0.138038	0.535398	0.708373
146	0.0649636	-0.226618	-0.305958	-0.0395351	0.46544	0.659546	-0.345537	1.56961	-0.122218	-0.413363	0.226548	-0.13122	0.460579	0.535662	-0.226436	0.172869	0.663594	-0.0117532	0.156317	0.490047	0.919132	3.20702	-1.44133	0.615924	0.0786612	0.377321	-0.158048	0.105321	-1.20337	-0.20365	-0.0171478	0.42518	-0.739456	-0.109433	0.459543	-0.485627	0.435744	0.232579	1.17057	0.105591	0.84805	-0.0542202	0.101209	-0.330352	0.105451	-0.333405	-0.131294	0.465157	1.30529
148	0.111403	-0.315256	-0.256012	-0.101548	0.418879	0.165806	-0.36019	1.40887	-0.211678	-0.261206	0.20731	-0.210957	0.51924	0.422529	-0.116533	0.284796	0.605332	-0.383577	0.280083	0.520096	0.535035	3.64698	-1.47889	0.564706	0.105299	0.256725	-0.0822161	0.175041	-1.1187	-0.231927	-0.214649	0.352445	-0.681943	-0.196148	0.365204	-0.486472	0.364647	0.173512	0.727479	0.37829	0.798788	-0.00857966	0.11887	-0.28862	0.160952	-0.267586	-0.115481	0.411227	1.89442
150	0.157992	-0.34194	-0.178993	-0.149323	0.350628	-0.333321	-0.389005	1.11737	-0.335383	-0.00903021	0.123978	-0.270016	0.573531	0.276836	-0.00945364	0.402807	0.537376	-0.734926	0.348071	0.527194	0.176538	3.94749	-1.47743	0.487435	0.128809	0.135066	0.00493263	0.25823	-1.01803	-0.276735	-0.404707	0.246691	-0.669178	-0.27462	0.287295	-0.470344	0.29277	0.0806661	0.22351	0.597463	0.700019	0.0337202	0.109736	-0.240033	0.205174	-0.149052	-0.0906277	0.366739	2.46366
152	0.20447	-0.289668	-0.0881766	-0.172114	0.28427	-0.795244	-0.407362	0.702746	-0.476065	0.2907	-0.0120881	-0.309364	0.603692	0.102324	0.0796399	0.511032	0.482747	-1.05365	0.335035	0.493363	-0.133686	4.09623	-1.40677	0.392437	0.146179	0.0279056	0.0907087	0.346069	-0.912056	-0.321654	-0.567501	0.134291	-0.702567	-0.33264	0.249311	-0.433645	0.23107	-0.0298756	-0.240348	0.744633	0.555648	0.0704912	0.0757333	-0.187615	0.231948	0.00839277	-0.0582943	0.32237	2.9892
154	0.247331	-0.160029	-0.00402771	-0.163843	0.237637	-1.18199	-0.401797	0.200454	-0.613965	0.572809	-0.179251	-0.333013	0.597642	-0.0902812	0.142569	0.594603	0.458463	-1.32993	0.233405	0.40975	-0.389018	4.09692	-1.24926	0.28979	0.156868	-0.050221	0.168003	0.426824	-0.813979	-0.352674	-0.688049	0.038558	-0.777213	-0.364316	0.26256	-0.367634	0.186171	-0.139612	-0.576076	0.81343	0.379388	0.100729	0.0239537	-0.132989	0.236985	0.180178	-0.0218189	0.270593	3.43793
156	0.279372	0.0253301	0.0521369	-0.124584	0.218676	-1.46848	-0.377468	-0.3319	-0.72899	0.778424	-0.351152	-0.345885	0.551738	-0.28512	0.177607	0.643556	0.470092	-1.55485	0.0547471	0.277465	-0.592551	3.966	-0.998709	0.188199	0.162923	-0.0898926	0.235977	0.489199	-0.736452	-0.363711	-0.758736	-0.0257617	-0.88297	-0.373001	0.325039	-0.261425	0.159268	-0.231346	-0.733812	0.808458	0.191512	0.123003	-0.0357787	-0.0766949	0.219434	0.336792	0.0139767	0.208389	3.77465
158	0.291922	0.228972	0.064731	-0.0608638	0.225429	-1.64701	-0.356637	-0.82569	-0.804256	0.871489	-0.502947	-0.351501	0.468711	-0.464941	0.188374	0.655692	0.510762	-1.71865	-0.174541	0.105614	-0.74739	3.72922	-0.657532	0.093085	0.168047	-0.0898814	0.298121	0.525993	-0.687375	-0.358535	-0.780562	-0.0551929	-1.0058	-0.370299	0.424542	-0.1078	0.146765	-0.292181	-0.712802	0.742775	0.0131977	0.134694	-0.0936073	-0.0190271	0.182515	0.450091	0.0436858	0.138094	3.97096
160	0.278826	0.406384	0.0284776	0.0154418	0.249627	-1.72602	-0.367728	-1.21475	-0.83016	0.847517	-0.616105	-0.350718	0.354509	-0.614938	0.182267	0.637211	0.56504	-1.81054	-0.421294	-0.0911943	-0.849	3.4177	-0.234838	0.00669777	0.175947	-0.0576025	0.358722	0.536366	-0.666378	-0.348525	-0.762552	-0.0568256	-1.12908	-0.371281	0.54378	0.0907079	0.142635	-0.314976	-0.555963	0.634925	-0.139196	0.132584	-0.141275	0.038927	0.132885	0.49759	0.0626022	0.0667468	4.01264
162	0.240335	0.516581	-0.0503842	0.0895393	0.281809	-1.72356	-0.429571	-1.44767	-0.806718	0.731983	-0.680693	-0.342001	0.2158	-0.725204	0.168256	0.600748	0.615493	-1.82114	-0.65432	-0.294091	-0.883802	3.06306	0.253309	-0.070152	0.188663	-0.00641427	0.419099	0.525684	-0.663921	-0.347484	-0.719131	-0.0446239	-1.23493	-0.388179	0.664711	0.318326	0.141831	-0.298275	-0.331863	0.50597	-0.257708	0.114386	-0.172192	0.0944969	0.0789931	0.463927	0.0679766	0.00438067	3.9034
164	0.185041	0.531874	-0.156363	0.147043	0.315408	-1.65797	-0.538659	-1.49592	-0.742168	0.569376	-0.695313	-0.322746	0.0589161	-0.791327	0.154268	0.561468	0.648501	-1.74713	-0.850992	-0.480015	-0.834876	2.69269	0.781906	-0.136118	0.205533	0.0492242	0.474896	0.503101	-0.663911	-0.365966	-0.665997	-0.0341096	-1.30623	-0.425598	0.770385	0.546917	0.143383	-0.245456	-0.111404	0.376593	-0.343013	0.0802008	-0.180583	0.143317	0.0290919	0.340884	0.0598068	-0.0386009	3.66416
166	0.128817	0.444546	-0.269447	0.17741	0.347992	-1.53992	-0.666474	-1.35667	-0.647882	0.407218	-0.665612	-0.29079	-0.110169	-0.813556	0.14519	0.532558	0.656643	-1.59554	-1.00013	-0.622403	-0.692107	2.32731	1.31518	-0.188489	0.223161	0.0986235	0.515435	0.478019	-0.64917	-0.407468	-0.615895	-0.0373025	-1.32911	-0.479154	0.844748	0.741066	0.151533	-0.163918	0.0529488	0.264461	-0.401623	0.0330406	-0.161047	0.180104	-0.0103107	0.128193	0.0408966	-0.0547537	3.32869
168	0.0908413	0.268943	-0.370725	0.176551	0.379552	-1.36951	-0.769271	-1.05059	-0.532047	0.281066	-0.602347	-0.245515	-0.28588	-0.795333	0.142653	0.521608	0.637288	-1.38465	-1.10115	-0.694682	-0.461996	1.98222	1.80729	-0.224072	0.236281	0.137603	0.52562	0.45685	-0.607733	-0.467628	-0.575977	-0.0596173	-1.29586	-0.537394	0.872616	0.865661	0.173887	-0.0645552	0.139378	0.182326	-0.441656	-0.021866	-0.109491	0.200176	-0.0351251	-0.163825	0.0161998	-0.0428347	2.93672
170	0.0878459	0.0381839	-0.447252	0.147813	0.409213	-1.14029	-0.806534	-0.61663	-0.395771	0.205822	-0.519486	-0.188504	-0.463731	-0.741861	0.146877	0.528877	0.589337	-1.14033	-1.16086	-0.677197	-0.172528	1.67192	2.20699	-0.241177	0.239155	0.168013	0.490064	0.441109	-0.537499	-0.535882	-0.547807	-0.0995338	-1.20709	-0.585182	0.842012	0.893602	0.217186	0.0389722	0.157628	0.137386	-0.469223	-0.0785194	-0.0253718	0.201191	-0.0435159	-0.51118	-0.00829839	-0.00955848	2.52646
172	0.128455	-0.204208	-0.494891	0.101016	0.432473	-0.848495	-0.759815	-0.106067	-0.234146	0.175878	-0.432338	-0.124027	-0.641427	-0.65919	0.159314	0.547721	0.510836	-0.889283	-1.18959	-0.565667	0.129574	1.41567	2.4661	-0.241294	0.227041	0.194581	0.398173	0.427202	-0.447419	-0.59806	-0.529697	-0.150621	-1.07231	-0.606785	0.749131	0.811595	0.282868	0.131874	0.139754	0.131965	-0.487036	-0.131638	0.0858981	0.184426	-0.0353148	-0.875741	-0.0268078	0.0314102	2.12849
174	0.209682	-0.415948	-0.518373	0.0498304	0.440544	-0.503598	-0.643418	0.422398	-0.0418923	0.172965	-0.355465	-0.059376	-0.819428	-0.554075	0.183938	0.566593	0.399125	-0.652224	-1.1983	-0.377182	0.389016	1.24116	2.54945	-0.229143	0.197372	0.220878	0.248319	0.407654	-0.354912	-0.638611	-0.51992	-0.204509	-0.908398	-0.588151	0.603526	0.622772	0.365128	0.200982	0.125105	0.16497	-0.495481	-0.177668	0.211833	0.15501	-0.0114759	-1.20984	-0.0347733	0.063365	1.76274
176	0.317163	-0.567469	-0.52865	0.00836812	0.422141	-0.135024	-0.502155	0.905988	0.179657	0.177634	-0.30031	-0.00465407	-1.00022	-0.434635	0.225629	0.571625	0.25311	-0.440094	-1.19721	-0.149874	0.556616	1.18497	2.44286	-0.210746	0.150395	0.246462	0.0493491	0.373113	-0.280728	-0.642199	-0.519077	-0.253214	-0.735674	-0.519103	0.429685	0.34577	0.452984	0.237895	0.145404	0.233304	-0.49509	-0.215219	0.333998	0.120936	0.0261873	-1.46568	-0.0295544	0.0719229	1.43925
178	0.429411	-0.649199	-0.538417	-0.0119353	0.366768	0.208646	-0.397294	1.28065	0.418664	0.179422	-0.272908	0.028615	-1.18624	-0.311395	0.286191	0.548839	0.0756848	-0.254311	-1.1956	0.0651572	0.603739	1.29003	2.15615	-0.190377	0.0891118	0.26643	-0.181336	0.314412	-0.243467	-0.59535	-0.530697	-0.289901	-0.57272	-0.396182	0.26238	0.0106135	0.535515	0.241126	0.214991	0.332708	-0.488514	-0.245071	0.431435	0.0911085	0.0750398	-1.6061	-0.01069	0.0494618	1.16186
180	0.52478	-0.671831	-0.557358	-0.00426757	0.267842	0.468757	-0.386744	1.48516	0.654829	0.181973	-0.27238	0.0302115	-1.37733	-0.197912	0.360485	0.485642	-0.125656	-0.0903076	-1.20176	0.217344	0.531537	1.60091	1.7201	-0.168022	0.0185026	0.273339	-0.422487	0.224077	-0.255797	-0.488816	-0.560277	-0.308335	-0.431215	-0.225688	0.136389	-0.347552	0.60743	0.216069	0.32857	0.45817	-0.48058	-0.269927	0.485627	0.073112	0.131655	-1.61217	0.0202387	-0.00332931	0.932537
182	0.588521	-0.659621	-0.588789	0.0331079	0.124236	0.591326	-0.507329	1.46807	0.866778	0.20188	-0.290946	-0.00540868	-1.56883	-0.110093	0.435637	0.371945	-0.340597	0.0576769	-1.22253	0.270539	0.371524	2.1573	1.17865	-0.138823	-0.0557493	0.260373	-0.654695	0.0971298	-0.323324	-0.320434	-0.613659	-0.302172	-0.312707	-0.0251774	0.0746658	-0.695363	0.671766	0.172554	0.465759	0.604352	-0.476294	-0.293891	0.485707	0.0713991	0.192009	-1.48445	0.0600856	-0.0791683	0.754141
184	0.617148	-0.639861	-0.628818	0.0976324	-0.0601579	0.54239	-0.765312	1.19692	1.0409	0.262453	-0.315756	-0.0765302	-1.75131	-0.0638102	0.494587	0.201535	-0.559043	0.192557	-1.26193	0.212036	0.176973	2.98542	0.579274	-0.0949213	-0.128626	0.224272	-0.864901	-0.0685603	-0.44562	-0.0972759	-0.695491	-0.265252	-0.208677	0.178412	0.0803481	-1.00704	0.738114	0.121073	0.599584	0.766313	-0.478107	-0.321601	0.432249	0.0864612	0.251862	-1.23826	0.104846	-0.167871	0.630241
186	0.618487	-0.633149	-0.668171	0.18385	-0.278137	0.318395	-1.13733	0.667486	1.17671	0.385164	-0.332178	-0.173788	-1.91231	-0.0712405	0.522537	-0.0260422	-0.773581	0.312488	-1.31975	0.053799	0.00786054	4.08822	-0.0351001	-0.0288952	-0.196727	0.166855	-1.04815	-0.271912	-0.617982	0.164342	-0.808063	-0.193271	-0.104133	0.354428	0.136374	-1.26772	0.817348	0.0694158	0.705478	0.940181	-0.484278	-0.357075	0.338069	0.115131	0.307252	-0.896398	0.150433	-0.259974	0.562593
188	0.607622	-0.648222	-0.695822	0.284814	-0.520908	-0.0522233	-1.5797	-0.0911772	1.28583	0.581832	-0.327628	-0.28247	-2.03945	-0.137188	0.512977	-0.303691	-0.980047	0.411512	-1.39094	-0.173639	-0.0856029	5.4368	-0.630619	0.0628136	-0.258501	0.0946778	-1.20629	-0.508022	-0.832597	0.441588	-0.950432	-0.0861026	0.0164307	0.476352	0.21279	-1.47365	0.91573	0.0211751	0.767985	1.12319	-0.489499	-0.402566	0.225218	0.151806	0.354975	-0.4832	0.193349	-0.348777	0.548181
190	0.60074	-0.68247	-0.702965	0.39315	-0.778876	-0.5168	-2.04162	-1.01874	1.38533	0.849993	-0.294772	-0.386705	-2.12409	-0.256916	0.470138	-0.61623	-1.1763	0.482297	-1.46662	-0.431462	-0.0754667	6.96707	-1.18326	0.177969	-0.313766	0.0171328	-1.34469	-0.767629	-1.07872	0.70992	-1.11782	0.0506184	0.16297	0.528879	0.278217	-1.62978	1.03147	-0.0235728	0.783604	1.31275	-0.487475	-0.457819	0.118777	0.190132	0.392968	-0.0224167	0.231111	-0.430497	0.577839
192	0.609507	-0.7265	-0.685875	0.501769	-1.04155	-1.01253	-2.47741	-2.03343	1.48942	1.17269	-0.233161	-0.473796	-2.16393	-0.416588	0.406815	-0.942093	-1.36031	0.51967	-1.53669	-0.683051	0.0391535	8.5852	-1.67726	0.308805	-0.362914	-0.0561968	-1.46861	-1.03735	-1.34254	0.948301	-1.30159	0.205758	0.336097	0.511449	0.310324	-1.74582	1.15522	-0.0662422	0.759633	1.50501	-0.473965	-0.520066	0.0396252	0.2246	0.420515	0.461937	0.262394	-0.503294	0.637409
194	0.638066	-0.769792	-0.646758	0.604372	-1.29738	-1.48172	-2.85453	-3.04722	1.60369	1.52247	-0.148845	-0.536999	-2.16373	-0.596394	0.339004	-1.25725	-1.52897	0.52338	-1.5928	-0.901487	0.235668	10.182	-2.10303	0.444165	-0.406221	-0.117926	-1.58083	-1.30124	-1.60777	1.14306	-1.49011	0.36496	0.526929	0.437048	0.301274	-1.83235	1.27393	-0.107742	0.710085	1.6939	-0.448633	-0.584765	-0.00101484	0.251635	0.438218	0.944323	0.286909	-0.566187	0.710886
[truncated: 15 more columns]

## Sheet: SHELL neurons
Time (ms)	Neuron 1	Neuron 2	Neuron 3	Neuron 4	Neuron 5	Neuron 6	Neuron 7	Neuron 8	Neuron 9	Neuron 10	Neuron 11	Neuron 12	Neuron 13	Neuron 14	Neuron 15	Neuron 16	Neuron 17	Neuron 18	Neuron 19	Neuron 20	Neuron 21	Neuron 22	Neuron 23	Neuron 24	Neuron 25	Neuron 26	Neuron 27	Neuron 28	Neuron 29	Neuron 30	Neuron 31	Neuron 32	Neuron 33	Neuron 34	Neuron 35	Neuron 36	Neuron 37	Neuron 38	Neuron 39	Neuron 40	Neuron 41	Neuron 42	Neuron 43	Neuron 44	Neuron 45	Neuron 46	Neuron 47	Neuron 48	Neuron 49
-200	1.89993	1.01525	0.141213	-0.57958	0.559399	-1.50724	-4.1944	-5.78738	-1.03069	-0.140094	0.0468396	-0.526486	-0.954273	-0.726332	1.77822	1.22045	-1.05567	1.9685	-0.694482	-0.109809	0.0446431	-0.196487	-0.692409	0.965503	-0.949403	0.195625	-0.204249	-0.053728	-0.351034	0.304876	-0.638175	0.331703	0.959525	-1.05034	-0.459036	-0.70327	0.731919	-2.07735	-0.328211	-0.58988	-0.0711267	0.692863	-2.06038	-0.923421	-1.48317	0.36825	-1.16698	-0.36685	-0.1149
-198	1.44193	0.605437	0.0758842	-0.673529	0.315504	-1.43014	-3.4781	-4.67917	-0.623911	-0.0674663	0.0397067	-0.571077	-0.870756	-0.678546	1.13507	1.12348	-0.844765	2.86858	-0.654215	-0.170152	0.074064	-0.192384	-0.641059	0.812618	-0.772141	0.0985821	-0.1723	0.018367	-0.358591	0.262956	-0.499132	0.206299	0.706272	-0.908187	-0.351203	-0.655133	0.573544	-2.00228	-0.272184	-0.518707	-0.0240969	0.985129	-1.97671	-0.535763	-1.19958	0.382746	-0.904507	-0.357127	-0.139983
-196	1.04553	0.266615	-0.0954492	-0.767853	0.100861	-1.30043	-2.72391	-3.56901	-0.255354	-0.0435543	0.0354683	-0.577153	-0.761464	-0.612064	0.551103	1.05911	-0.652941	3.58949	-0.613929	-0.222916	0.106552	-0.198895	-0.578103	0.664898	-0.602941	-0.0193596	-0.160708	0.0627993	-0.404427	0.221488	-0.344567	0.0877793	0.466087	-0.786866	-0.25565	-0.606388	0.435537	-1.89441	-0.21039	-0.437987	0.00731621	1.15323	-1.85772	-0.0250891	-0.963113	0.369745	-0.654426	-0.346754	-0.147944
-194	0.731306	0.0318096	-0.364542	-0.858568	-0.0669703	-1.12014	-1.95923	-2.56253	0.0489085	-0.0806141	0.0322005	-0.534933	-0.6412	-0.53295	0.0612597	1.04881	-0.498679	4.02988	-0.572227	-0.258588	0.14224	-0.213736	-0.507609	0.530942	-0.450679	-0.150398	-0.162265	0.0768142	-0.475631	0.17949	-0.186955	-0.0177342	0.252747	-0.689969	-0.174679	-0.553936	0.326378	-1.75415	-0.14839	-0.350742	0.0197043	1.1666	-1.67251	0.63005	-0.788742	0.330501	-0.434486	-0.333936	-0.138398
-192	0.500555	-0.0860945	-0.702972	-0.942212	-0.182467	-0.898307	-1.21249	-1.74	0.277478	-0.179166	0.0279125	-0.443823	-0.528479	-0.450158	-0.318586	1.11103	-0.39458	4.13379	-0.526981	-0.268792	0.181722	-0.231977	-0.433404	0.418253	-0.3206	-0.281439	-0.162445	0.0636084	-0.551624	0.135966	-0.0414066	-0.106626	0.0761626	-0.61914	-0.107157	-0.495515	0.247781	-1.59392	-0.0925399	-0.260311	0.013151	1.02297	-1.38509	1.44213	-0.678242	0.270815	-0.257926	-0.316925	-0.114448
-190	0.337827	-0.0978997	-1.06622	-1.01491	-0.252449	-0.648266	-0.515521	-1.1372	0.434643	-0.326998	0.0206594	-0.313664	-0.439929	-0.373135	-0.589852	1.25333	-0.346566	3.90605	-0.476362	-0.24931	0.225786	-0.247616	-0.357413	0.332583	-0.214539	-0.396244	-0.143566	0.0311341	-0.610562	0.0913084	0.0765012	-0.177794	-0.0580535	-0.575539	-0.0501887	-0.431631	0.1943	-1.43952	-0.0483697	-0.170001	-0.00880184	0.750412	-0.960693	2.40792	-0.620396	0.198774	-0.131315	-0.29474	-0.0817208
-188	0.219814	-0.0337738	-1.40214	-1.07133	-0.291842	-0.384563	0.0938903	-0.744253	0.536152	-0.502135	0.00816297	-0.16284	-0.385042	-0.309211	-0.763503	1.46542	-0.354973	3.41001	-0.419826	-0.202525	0.274805	-0.255587	-0.279297	0.277211	-0.132086	-0.479173	-0.0912958	-0.010295	-0.636268	0.0481356	0.153522	-0.231819	-0.148427	-0.560016	-0.00151759	-0.366413	0.154945	-1.32575	-0.0190295	-0.0829743	-0.0401052	0.400603	-0.372754	3.50305	-0.594709	0.121887	-0.0540402	-0.267619	-0.0467743
-186	0.126655	0.0679644	-1.66188	-1.10457	-0.317232	-0.121114	0.572861	-0.521285	0.601726	-0.678682	-0.012657	-0.0138912	-0.363411	-0.261842	-0.850855	1.71698	-0.415703	2.74846	-0.358648	-0.138053	0.327953	-0.253281	-0.197926	0.252201	-0.0718729	-0.519314	-0.00115796	-0.0506355	-0.622893	0.0108741	0.181785	-0.26971	-0.197375	-0.571701	0.0385633	-0.306868	0.116293	-1.28631	-0.00449756	-0.00241424	-0.0736704	0.0358199	0.391037	4.67956	-0.577103	0.0447891	-0.0195794	-0.237	-0.0155814
-184	0.0504409	0.174952	-1.81011	-1.10745	-0.341296	0.128566	0.880069	-0.420533	0.647207	-0.833402	-0.0456414	0.111841	-0.365532	-0.23041	-0.857924	1.96216	-0.519825	2.03547	-0.295828	-0.0708511	0.382555	-0.240853	-0.114053	0.254008	-0.0323053	-0.513414	0.117739	-0.0820704	-0.575581	-0.0159285	0.161421	-0.291841	-0.210977	-0.606104	0.0668323	-0.26072	0.0662086	-1.34153	-0.00195902	0.0681186	-0.102768	-0.285481	1.32467	5.86718	-0.545553	-0.0316187	-0.0180609	-0.205098	0.00742983
-182	-0.00302888	0.272259	-1.83162	-1.07498	-0.370235	0.350022	0.987409	-0.402555	0.67894	-0.950824	-0.0944945	0.198809	-0.376679	-0.211576	-0.785981	2.14965	-0.651463	1.36953	-0.235498	-0.0171466	0.43397	-0.220269	-0.0325637	0.275825	-0.0116295	-0.466486	0.243857	-0.0997713	-0.507228	-0.0297917	0.10193	-0.297673	-0.198497	-0.654518	0.0786016	-0.233709	-0.0029064	-1.48897	-0.00723051	0.124335	-0.121867	-0.51973	2.40243	6.97878	-0.484025	-0.109439	-0.0391521	-0.174319	0.0196696
-180	-0.0197706	0.366535	-1.73247	-1.0067	-0.404465	0.527413	0.892172	-0.439953	0.692013	-1.02549	-0.161232	0.23989	-0.382118	-0.201488	-0.637341	2.23501	-0.785763	0.816688	-0.182099	0.0104403	0.476223	-0.19369	0.0373794	0.308776	-0.00767309	-0.38993	0.349555	-0.101491	-0.433033	-0.0318492	0.0215398	-0.286432	-0.171278	-0.70576	0.0703837	-0.227405	-0.0922487	-1.70115	-0.0165579	0.161173	-0.126755	-0.643304	3.58026	7.91968	-0.384137	-0.191888	-0.0741132	-0.146789	0.0202715
-178	0.0128015	0.481051	-1.53648	-0.90775	-0.441209	0.645534	0.623719	-0.510879	0.672842	-1.0611	-0.244637	0.236671	-0.371547	-0.197772	-0.42248	2.19067	-0.889645	0.407133	-0.139568	0.00669761	0.503313	-0.162151	0.0849918	0.343628	-0.0177398	-0.298102	0.410632	-0.0864987	-0.365136	-0.0268666	-0.055748	-0.258459	-0.140987	-0.749568	0.0424722	-0.238418	-0.196631	-1.93193	-0.0278846	0.173355	-0.114241	-0.65174	4.79954	8.5999	-0.244965	-0.281067	-0.116239	-0.124123	0.00992683
-176	0.0973545	0.643486	-1.27941	-0.787788	-0.477215	0.69402	0.240393	-0.590318	0.60542	-1.0673	-0.339458	0.197689	-0.341292	-0.200437	-0.164036	2.01131	-0.927312	0.142557	-0.110628	-0.0249734	0.510729	-0.12525	0.102457	0.372425	-0.038879	-0.204712	0.415399	-0.0545996	-0.309299	-0.0216113	-0.105074	-0.216476	-0.117568	-0.779528	0.000123062	-0.259341	-0.306304	-2.1291	-0.0409606	0.15662	-0.0819809	-0.555219	5.99246	8.94782	-0.0719739	-0.37629	-0.15976	-0.107366	-0.00915061
-174	0.223352	0.871192	-1.00319	-0.658564	-0.510323	0.671609	-0.18338	-0.646199	0.479088	-1.05543	-0.436737	0.135354	-0.293969	-0.211267	0.104939	1.71383	-0.87006	0.00767305	-0.0962036	-0.0744188	0.496581	-0.0820035	0.0893977	0.389518	-0.0683902	-0.120261	0.369324	-0.00587807	-0.264504	-0.0223041	-0.106507	-0.166005	-0.10752	-0.793428	-0.0473612	-0.281138	-0.409914	-2.24848	-0.0563177	0.10933	-0.0289205	-0.37283	7.08777	8.92262	0.124109	-0.473636	-0.198199	-0.0969873	-0.0332342
-172	0.370071	1.15946	-0.750936	-0.531071	-0.539654	0.58783	-0.57544	-0.641962	0.294715	-1.03468	-0.525155	0.0624878	-0.23639	-0.231971	0.34801	1.33317	-0.707197	-0.021061	-0.0950324	-0.128846	0.461883	-0.0323578	0.055013	0.391863	-0.104179	-0.0509789	0.293011	0.0587051	-0.225183	-0.0323339	-0.0501051	-0.114615	-0.113047	-0.79059	-0.0893962	-0.296109	-0.497595	-2.26472	-0.0738043	0.0337801	0.0436243	-0.127367	8.01611	8.52248	0.328315	-0.566941	-0.223552	-0.0928274	-0.0573474
-170	0.513683	1.47709	-0.561761	-0.413559	-0.565047	0.460914	-0.883128	-0.542255	0.0663617	-1.0098	-0.592926	-0.010589	-0.176873	-0.261839	0.534652	0.915081	-0.453311	0.0267777	-0.10365	-0.177481	0.409974	0.0215054	0.0166175	0.378815	-0.144615	0.000946153	0.214286	0.136272	-0.184936	-0.0512389	0.0613524	-0.0702836	-0.132315	-0.767974	-0.117643	-0.300295	-0.5632	-2.17525	-0.091619	-0.0634797	0.130767	0.158641	8.71451	7.78612	0.522693	-0.649812	-0.227268	-0.0941048	-0.0760019
-168	0.63454	1.77104	-0.464628	-0.310786	-0.586722	0.312974	-1.08355	-0.317619	-0.182543	-0.980801	-0.629788	-0.0775979	-0.122826	-0.29593	0.647894	0.506661	-0.147951	0.112625	-0.116916	-0.214894	0.345492	0.0748545	-0.00510997	0.351809	-0.187834	0.0363742	0.158056	0.221297	-0.140217	-0.0752763	0.21293	-0.0396144	-0.16067	-0.718106	-0.128846	-0.294354	-0.605108	-1.99699	-0.106446	-0.172644	0.223582	0.465628	9.1307	6.78696	0.688252	-0.717684	-0.202885	-0.0995956	-0.0843756
-166	0.721546	1.97885	-0.472127	-0.224212	-0.605824	0.164894	-1.18391	0.0530921	-0.426616	-0.944515	-0.628814	-0.13609	-0.0789031	-0.324732	0.687487	0.146165	0.153288	0.186055	-0.129047	-0.241802	0.273445	0.121385	0.00748168	0.314153	-0.230827	0.0579019	0.138688	0.30578	-0.0925888	-0.0991307	0.381285	-0.0266292	-0.192378	-0.631059	-0.125802	-0.282545	-0.625527	-1.75773	-0.114583	-0.282597	0.310064	0.778422	9.22784	5.62118	0.807563	-0.768899	-0.149093	-0.108037	-0.0796033
-164	0.77264	2.0454	-0.577059	-0.152525	-0.625659	0.0329387	-1.21267	0.580682	-0.645654	-0.896836	-0.587918	-0.185771	-0.0457445	-0.33582	0.667947	-0.145547	0.393626	0.187742	-0.134897	-0.263198	0.198743	0.155178	0.0631977	0.270834	-0.268925	0.0684642	0.158184	0.380433	-0.0487109	-0.117872	0.540403	-0.0323818	-0.222316	-0.500243	-0.116037	-0.270265	-0.628786	-1.48608	-0.11334	-0.382896	0.377589	1.08618	8.99009	4.39274	0.867512	-0.804269	-0.0715674	-0.118595	-0.0617035
-162	0.792482	1.93895	-0.754459	-0.0921316	-0.652586	-0.0725327	-1.20492	1.26196	-0.827973	-0.834748	-0.510827	-0.226324	-0.0194498	-0.317239	0.612968	-0.36854	0.530756	0.0605961	-0.13105	-0.284823	0.126094	0.172858	0.158603	0.227962	-0.29627	0.0700243	0.210182	0.436413	-0.0181305	-0.128369	0.667538	-0.0551761	-0.247163	-0.328998	-0.108782	-0.26126	-0.619312	-1.20371	-0.101893	-0.464904	0.416189	1.38048	8.42781	3.19852	0.86149	-0.825479	0.0176602	-0.131105	-0.0337545
-160	0.789208	1.66157	-0.969192	-0.0376987	-0.695321	-0.14724	-1.18742	2.07525	-0.968937	-0.757325	-0.407105	-0.255954	0.00783836	-0.261595	0.54858	-0.540126	0.547937	-0.234077	-0.116443	-0.309579	0.0598949	0.17504	0.277997	0.191506	-0.307341	0.0626741	0.286714	0.466918	-0.00986224	-0.129821	0.747689	-0.0909984	-0.26577	-0.133915	-0.111495	-0.255725	-0.600038	-0.922606	-0.0811783	-0.521737	0.421414	1.65173	7.58018	2.11677	0.790604	-0.833254	0.103319	-0.145864	-0.00121698
-158	0.771618	1.25031	-1.18602	0.0169306	-0.762151	-0.192931	-1.16799	2.97887	-1.06677	-0.665786	-0.290765	-0.271469	0.0460311	-0.169343	0.497129	-0.684949	0.457004	-0.702674	-0.0924282	-0.33543	0.00377857	0.166462	0.396717	0.165345	-0.298987	0.0445973	0.383562	0.468111	-0.0293042	-0.123567	0.775683	-0.133993	-0.278697	0.0578176	-0.127336	-0.250056	-0.571721	-0.647449	-0.0530479	-0.547558	0.395596	1.88514	6.51292	1.2001	0.663883	-0.826162	0.171305	-0.16294	0.0293618
-156	0.747173	0.768659	-1.37758	0.0773049	-0.856978	-0.216894	-1.13294	3.91586	-1.1193	-0.563118	-0.17744	-0.269815	0.104293	-0.0499476	0.473071	-0.823296	0.292769	-1.31491	-0.0623576	-0.355605	-0.0401622	0.154702	0.487015	0.149336	-0.271936	0.0131884	0.501452	0.43923	-0.0768303	-0.112542	0.755762	-0.177141	-0.287079	0.216456	-0.154459	-0.238236	-0.533333	-0.380928	-0.0193379	-0.537172	0.346906	2.05853	5.31026	0.473651	0.497566	-0.800261	0.212491	-0.18129	0.0518158
-154	0.720674	0.291173	-1.52727	0.146645	-0.976121	-0.229998	-1.05292	4.82448	-1.12428	-0.45391	-0.0807722	-0.250148	0.18837	0.0796681	0.480723	-0.963395	0.101097	-2.01179	-0.030813	-0.360931	-0.0720442	0.147963	0.525165	0.138507	-0.230838	-0.0328865	0.643139	0.382142	-0.148457	-0.100631	0.699227	-0.213382	-0.291223	0.319468	-0.187133	-0.21409	-0.483277	-0.128691	0.018531	-0.486662	0.286588	2.14436	4.06242	-0.0624808	0.31337	-0.749299	0.224338	-0.198042	0.0615599
-152	0.693644	-0.113857	-1.62709	0.224354	-1.10766	-0.242776	-0.895116	5.64891	-1.0833	-0.344614	-0.00923734	-0.215119	0.299043	0.198955	0.513967	-1.10133	-0.0752662	-2.72249	-0.00257544	-0.34319	-0.0942357	0.15273	0.498104	0.124382	-0.182578	-0.0915133	0.808759	0.30069	-0.23781	-0.0919763	0.620946	-0.237165	-0.289477	0.358302	-0.218023	-0.173407	-0.420923	0.0987605	0.0591572	-0.395014	0.225515	2.11678	2.8518	-0.427871	0.135535	-0.665174	0.20982	-0.20835	0.0562885
-150	0.664805	-0.39837	-1.67359	0.305276	-1.23381	-0.260638	-0.637067	6.3435	-1.00622	-0.243981	0.0354041	-0.170458	0.431972	0.288597	0.558109	-1.22776	-0.208642	-3.38228	0.0185418	-0.298114	-0.110525	0.172105	0.407758	0.0985017	-0.133531	-0.155973	0.992283	0.200121	-0.337958	-0.0901539	0.535484	-0.246001	-0.277966	0.339163	-0.240682	-0.115125	-0.347798	0.288	0.100224	-0.265939	0.171472	1.96167	1.74159	-0.65519	-0.0132678	-0.538928	0.174545	-0.206019	0.0361937
-148	0.631937	-0.542079	-1.66517	0.379963	-1.33529	-0.280581	-0.277083	6.86776	-0.912437	-0.163036	0.0575423	-0.122882	0.578373	0.334884	0.594022	-1.33652	-0.292653	-3.94401	0.0307506	-0.226871	-0.124656	0.205313	0.271545	0.0568615	-0.0870662	-0.215671	1.18068	0.0866473	-0.441973	-0.0972623	0.453583	-0.241355	-0.251554	0.278072	-0.251423	-0.0413168	-0.2679	0.427046	0.137664	-0.108908	0.128082	1.68541	0.769629	-0.78377	-0.116287	-0.362834	0.123761	-0.184882	0.0038605
-146	0.594683	-0.553106	-1.60226	0.43598	-1.3958	-0.291429	0.162709	7.17644	-0.826622	-0.113888	0.0654718	-0.0773625	0.725801	0.332385	0.60393	-1.42947	-0.341253	-4.38002	0.0349036	-0.135598	-0.138817	0.248344	0.118561	0.00309978	-0.0426299	-0.258846	1.3556	-0.0329425	-0.542152	-0.113175	0.37973	-0.228425	-0.205939	0.193312	-0.250069	0.0437214	-0.18693	0.509609	0.165617	0.0612068	0.0954265	1.3175	-0.0517763	-0.854027	-0.165877	-0.133756	0.0607678	-0.140655	-0.0360381
-144	0.556937	-0.463091	-1.48934	0.460111	-1.40511	-0.277856	0.641856	7.21373	-0.769854	-0.107023	0.068509	-0.0353139	0.858993	0.284354	0.577084	-1.51448	-0.381365	-4.67679	0.0343956	-0.0333171	-0.152706	0.295321	-0.0176933	-0.051563	0.00303726	-0.276398	1.49648	-0.151684	-0.62895	-0.135338	0.311517	-0.214799	-0.140218	0.0991504	-0.239406	0.134671	-0.110713	0.536969	0.177551	0.22581	0.0716011	0.904914	-0.730806	-0.902844	-0.164267	0.143208	-0.0127425	-0.0726999	-0.077272
-142	0.527155	-0.31852	-1.3363	0.441289	-1.36007	-0.226352	1.11362	6.91907	-0.750108	-0.147376	0.0745197	0.00514616	0.961436	0.201109	0.513072	-1.59812	-0.44178	-4.82816	0.0342811	0.0709419	-0.163503	0.33998	-0.108014	-0.0921694	0.0530568	-0.26536	1.58388	-0.262838	-0.691042	-0.159352	0.241232	-0.208497	-0.0588515	0.00324461	-0.223523	0.226063	-0.0435043	0.51673	0.168282	0.365147	0.0542186	0.499794	-1.28813	-0.959731	-0.121703	0.452629	-0.0950817	0.0149409	-0.112913
-140	0.515658	-0.169568	-1.15745	0.3738	-1.26365	-0.130434	1.53912	6.2455	-0.756867	-0.23042	0.0884423	0.0468653	1.01841	0.0971174	0.421268	-1.67815	-0.541819	-4.83201	0.0397916	0.170836	-0.166714	0.376798	-0.135087	-0.106235	0.107412	-0.230463	1.60274	-0.360239	-0.717299	-0.180238	0.159432	-0.216132	0.0279767	-0.0921815	-0.205652	0.31255	0.0130462	0.45945	0.136057	0.461273	0.0411574	0.145714	-1.7485	-1.04387	-0.052967	0.769895	-0.182883	0.113747	-0.136553
-138	0.529608	-0.0576041	-0.967969	0.259924	-1.12256	0.00691108	1.89824	5.18389	-0.762962	-0.340072	0.111857	0.0905576	1.02119	-0.0122345	0.316735	-1.74087	-0.683032	-4.69156	0.054637	0.264328	-0.157582	0.401584	-0.0978216	-0.0895381	0.16148	-0.182935	1.54531	-0.438579	-0.700156	-0.193957	0.0594811	-0.241832	0.10605	-0.18716	-0.18643	0.388763	0.0597421	0.375207	0.0836443	0.501104	0.030474	-0.132106	-2.13404	-1.16248	0.026164	1.06583	-0.270304	0.212209	-0.143697
-136	0.567993	-0.00349722	-0.779483	0.110759	-0.944342	0.173885	2.19336	3.78236	-0.733391	-0.450073	0.143326	0.132801	0.970784	-0.113397	0.214673	-1.76539	-0.84627	-4.41892	0.0795805	0.353621	-0.132618	0.411632	-0.0113438	-0.0487554	0.207106	-0.136749	1.41358	-0.493728	-0.638726	-0.198599	-0.0585701	-0.287148	0.160482	-0.280878	-0.163483	0.449299	0.0985567	0.271877	0.0178264	0.479155	0.0198823	-0.329264	-2.46056	-1.31096	0.101424	1.31317	-0.349371	0.298138	-0.132958
-134	0.619527	-0.000154053	-0.596795	-0.0558202	-0.735064	0.352556	2.44404	2.15189	-0.637831	-0.529247	0.179158	0.166396	0.879059	-0.196457	0.126006	-1.73271	-0.99518	-4.03725	0.111763	0.443218	-0.0908466	0.405633	0.0971948	0.000329442	0.235929	-0.103683	1.22053	-0.523122	-0.539829	-0.194858	-0.186368	-0.351702	0.179656	-0.369894	-0.132688	0.489303	0.13085	0.155636	-0.0525274	0.39926	0.00634722	-0.457683	-2.73693	-1.47518	0.161415	1.49231	-0.411102	0.361025	-0.106625
-132	0.665296	-0.0130206	-0.417403	-0.220033	-0.498611	0.522123	2.67422	0.454284	-0.462237	-0.54928	0.214333	0.182927	0.766014	-0.255812	0.0556496	-1.63466	-1.08572	-3.57983	0.145091	0.536575	-0.0344383	0.383541	0.195725	0.0382944	0.243377	-0.0892064	0.989297	-0.526164	-0.416067	-0.18574	-0.308832	-0.433956	0.158434	-0.447768	-0.0906634	0.505663	0.155979	0.0326701	-0.1189	0.274347	-0.0138308	-0.537222	-2.96656	-1.63512	0.198432	1.59405	-0.446915	0.393781	-0.0703097
-130	0.685638	0.00978565	-0.234228	-0.366303	-0.238202	0.661905	2.89609	-1.12601	-0.215613	-0.492348	0.243435	0.176095	0.653926	-0.289778	0.00317749	-1.47779	-1.07967	-3.08692	0.171689	0.63263	0.0313887	0.34645	0.25541	0.0489262	0.231291	-0.0909698	0.750082	-0.504438	-0.281639	-0.175719	-0.408681	-0.53147	0.0995766	-0.505615	-0.0373067	0.498292	0.171003	-0.0896528	-0.174964	0.123667	-0.0443602	-0.587235	-3.14967	-1.76936	0.209251	1.61891	-0.449955	0.393562	-0.0316736
-128	0.6684	0.120031	-0.040677	-0.487858	0.0406896	0.754047	3.09673	-2.41951	0.0700482	-0.355866	0.261555	0.143984	0.560763	-0.299423	-0.0356692	-1.28071	-0.95841	-2.60304	0.184027	0.72397	0.0991744	0.296481	0.257766	0.0247672	0.207767	-0.100543	0.535301	-0.46155	-0.147854	-0.169668	-0.472348	-0.640351	0.0129549	-0.533255	0.0228395	0.470671	0.171624	-0.203319	-0.217163	-0.0321598	-0.0879173	-0.620872	-3.28531	-1.85894	0.195779	1.57409	-0.416269	0.361787	0.00144316
-126	0.61482	0.350817	0.163923	-0.58736	0.327727	0.786248	3.23363	-3.30963	0.346554	-0.152912	0.265175	0.0892337	0.495626	-0.287191	-0.0679969	-1.06655	-0.732454	-2.17537	0.177031	0.798076	0.160537	0.236644	0.198968	-0.0305384	0.184233	-0.107549	0.373992	-0.402573	-0.0205034	-0.171791	-0.494931	-0.754179	-0.0872058	-0.521061	0.0811146	0.429152	0.153872	-0.301691	-0.244145	-0.176672	-0.145055	-0.643183	-3.37258	-1.88998	0.164923	1.47034	-0.345777	0.303633	0.0229497
-124	0.540326	0.704398	0.370896	-0.672914	0.607177	0.754386	3.2431	-3.76039	0.561232	0.0913816	0.252961	0.0173242	0.457739	-0.25602	-0.103321	-0.854724	-0.442688	-1.85154	0.149485	0.841694	0.207758	0.170664	0.0901548	-0.103615	0.171161	-0.104209	0.28671	-0.333203	0.0997386	-0.184727	-0.481822	-0.863218	-0.186249	-0.462656	0.126953	0.381152	0.115721	-0.381639	-0.255746	-0.301447	-0.213444	-0.652535	-3.4113	-1.85413	0.127128	1.32005	-0.242951	0.227237	0.0298879
-122	0.46991	1.15121	0.562685	-0.751299	0.86009	0.664136	3.06082	-3.82462	0.670669	0.345841	0.226262	-0.0657941	0.438657	-0.209457	-0.152422	-0.655605	-0.152002	-1.67382	0.10425	0.846594	0.235357	0.102743	-0.0463566	-0.175623	0.1744	-0.0882294	0.281808	-0.258817	0.214278	-0.208934	-0.44591	-0.954769	-0.273005	-0.358065	0.150881	0.332977	0.0578837	-0.444324	-0.252305	-0.406577	-0.287764	-0.643964	-3.40232	-1.74689	0.0937282	1.13704	-0.116916	0.142674	0.0228677
-120	0.430043	1.63973	0.717492	-0.821865	1.06823	0.530339	2.64794	-3.62831	0.652936	0.579773	0.189	-0.155378	0.425987	-0.152599	-0.2242	-0.469651	0.0704711	-1.66825	0.0473076	0.813868	0.241298	0.0372727	-0.183911	-0.227802	0.193606	-0.062971	0.35365	-0.183566	0.322612	-0.242535	-0.401326	-1.01507	-0.342435	-0.21607	0.14717	0.288245	-0.0164514	-0.494249	-0.234659	-0.49752	-0.360431	-0.612805	-3.34768	-1.56399	0.0739168	0.93681	0.0193777	0.0606803	0.00548093
-118	0.440235	2.11177	0.816325	-0.874308	1.21782	0.373518	2.01214	-3.33383	0.51495	0.768555	0.146788	-0.248195	0.406853	-0.0930143	-0.320643	-0.289596	0.167429	-1.83191	-0.0139514	0.754398	0.227483	-0.0214937	-0.299326	-0.246523	0.223043	-0.0352643	0.483166	-0.109708	0.419482	-0.28174	-0.356645	-1.03236	-0.39605	-0.0542031	0.115347	0.247513	-0.102661	-0.537403	-0.20463	-0.579926	-0.423082	-0.55716	-3.25026	-1.29696	0.0723567	0.735955	0.15117	-0.0088565	-0.0170408
-116	0.507059	2.5162	0.849166	-0.891556	1.30159	0.214226	1.21394	-3.09297	0.292603	0.897476	0.105451	-0.341756	0.370291	-0.0405777	-0.431912	-0.103382	0.108098	-2.12473	-0.0725648	0.685105	0.199231	-0.069785	-0.379257	-0.226503	0.253982	-0.0123009	0.641088	-0.0374321	0.494602	-0.321806	-0.311201	-0.999965	-0.439917	0.104532	0.0602728	0.209175	-0.195823	-0.579746	-0.165445	-0.655032	-0.468481	-0.478468	-3.11277	-0.92987	0.0881009	0.550064	0.264914	-0.0584943	-0.0394659
-114	0.622247	2.81599	0.817199	-0.856365	1.31865	0.06718	0.353905	-3.00492	0.0432159	0.963458	0.0694441	-0.433398	0.308772	-0.00571283	-0.534529	0.103739	-0.104387	-2.47219	-0.123352	0.622875	0.163724	-0.104627	-0.423205	-0.171591	0.277415	0.000884375	0.793864	0.0345139	0.535162	-0.358257	-0.256806	-0.918379	-0.481059	0.237584	-0.00897716	0.171092	-0.291347	-0.626601	-0.121647	-0.71787	-0.492313	-0.380397	-2.93605	-0.439063	0.114878	0.390666	0.351504	-0.0845861	-0.058019
-112	0.764983	2.98807	0.730165	-0.758497	1.2732	-0.0625385	-0.455182	-3.09351	-0.167934	0.974474	0.0408102	-0.520074	0.219428	0.00344641	-0.59487	0.3475	-0.434046	-2.7807	-0.163436	0.579131	0.127851	-0.124117	-0.442465	-0.0932416	0.286115	0.00250417	0.911451	0.107301	0.530031	-0.387967	-0.184244	-0.795381	-0.523798	0.329287	-0.0809962	0.132189	-0.384911	-0.682393	-0.0784326	-0.759022	-0.494281	-0.267108	-2.71694	0.202211	0.142361	0.262781	0.408399	-0.087959	-0.0712775
-110	0.907463	3.01959	0.600777	-0.599288	1.17325	-0.179701	-1.12043	-3.31104	-0.283492	0.946782	0.0190129	-0.598989	0.10513	-0.0163246	-0.577957	0.641571	-0.820343	-2.96089	-0.191922	0.557335	0.0961746	-0.127668	-0.455664	-0.00742709	0.275675	-0.00627199	0.975016	0.180014	0.47396	-0.409709	-0.0910947	-0.644383	-0.567629	0.37507	-0.144208	0.0933059	-0.471986	-0.749657	-0.0406917	-0.768863	-0.478083	-0.142137	-2.44633	1.01447	0.157988	0.164439	0.43951	-0.0735745	-0.0802767
-108	1.02212	2.90508	0.439857	-0.39194	1.03007	-0.295552	-1.59326	-3.56563	-0.268128	0.900467	0.00162757	-0.668455	-0.0251244	-0.0622423	-0.458985	0.992066	-1.19125	-2.95006	-0.208979	0.553769	0.0698714	-0.116263	-0.482602	0.0690685	0.244712	-0.0224247	0.981829	0.248061	0.370188	-0.424017	0.0135721	-0.48163	-0.607443	0.38147	-0.188902	0.0569428	-0.547551	-0.826837	-0.0121523	-0.742119	-0.450237	-0.00861409	-2.10805	1.99997	0.149107	0.0884129	0.45264	-0.0491151	-0.0877862
-106	1.08861	2.64747	0.255042	-0.157978	0.857982	-0.422207	-1.8779	-3.76026	-0.11725	0.854298	-0.0144849	-0.728113	-0.15725	-0.126464	-0.233527	1.39084	-1.47818	-2.72515	-0.214754	0.56022	0.0471164	-0.0926966	-0.538419	0.122025	0.194621	-0.0424172	0.94506	0.302998	0.230619	-0.432426	0.110559	-0.323217	-0.635782	0.361836	-0.208784	0.0260212	-0.606454	-0.905743	0.00516296	-0.68059	-0.418111	0.129515	-1.67909	3.13195	0.105409	0.0251069	0.45563	-0.0228669	-0.0969652
-104	1.09868	2.26238	0.053089	0.0781221	0.673767	-0.56696	-2.02267	-3.82753	0.141749	0.82112	-0.0319876	-0.778143	-0.274822	-0.19859	0.0776394	1.81109	-1.62954	-2.30248	-0.208552	0.566728	0.0248107	-0.0616694	-0.629763	0.142155	0.129128	-0.0633712	0.888023	0.334264	0.0736494	-0.436392	0.177737	-0.182684	-0.645942	0.329652	-0.201779	0.00225967	-0.64446	-0.970436	0.0111609	-0.59288	-0.387858	0.266463	-1.13183	4.34954	0.0215071	-0.0349066	0.453151	-0.00161538	-0.109864
-102	1.05711	1.78195	-0.15688	0.293748	0.494936	-0.728522	-2.09936	-3.74702	0.456	0.804881	-0.0522628	-0.817983	-0.362912	-0.268569	0.43141	2.20912	-1.61956	-1.72611	-0.188611	0.563359	0.000911691	-0.0295315	-0.753822	0.126171	0.0537456	-0.083847	0.834933	0.332427	-0.079612	-0.436298	0.199898	-0.069538	-0.634535	0.292486	-0.169924	-0.0150121	-0.659555	-0.999181	0.00765935	-0.491386	-0.362967	0.395019	-0.438619	5.56129	-0.100772	-0.0996123	0.445793	0.0106875	-0.12637
-100	0.978353	1.2544	-0.362265	0.470946	0.337078	-0.896347	-2.17934	-3.54106	0.759862	0.799935	-0.0752615	-0.845563	-0.411726	-0.328895	0.772617	2.53342	-1.45028	-1.0508	-0.152636	0.54115	-0.0236903	-0.00347891	-0.900058	0.0766119	-0.0249415	-0.104018	0.801994	0.292702	-0.209641	-0.430951	0.176761	0.0112309	-0.602664	0.249376	-0.118463	-0.028896	-0.652809	-0.969746	-0.00189695	-0.387943	-0.343865	0.508766	0.421299	6.65719	-0.251138	-0.175275	0.431701	0.0130624	-0.144075
-98	0.879929	0.736821	-0.549032	0.597197	0.211239	-1.05301	-2.31441	-3.25453	0.99077	0.792697	-0.100098	-0.857839	-0.418763	-0.375507	1.0486	2.73859	-1.14638	-0.326497	-0.0989692	0.492942	-0.0446681	0.00976887	-1.05366	0.000786949	-0.100158	-0.125108	0.79255	0.217312	-0.302239	-0.417802	0.125392	0.0587503	-0.555612	0.192798	-0.0544946	-0.0436351	-0.62829	-0.866731	-0.0131022	-0.290024	-0.328531	0.605048	1.45347	7.52605	-0.411439	-0.266154	0.40945	0.006588	-0.159111
-96	0.775222	0.282535	-0.705148	0.665426	0.122645	-1.17858	-2.52677	-2.93157	1.10408	0.765148	-0.126192	-0.852459	-0.388843	-0.407464	1.22317	2.79847	-0.745889	0.410354	-0.0279764	0.4145	-0.0554694	0.00548876	-1.19926	-0.090757	-0.165926	-0.148234	0.797882	0.115767	-0.350866	-0.393865	0.0755424	0.0751332	-0.501449	0.114286	0.0143392	-0.0625031	-0.591975	-0.688517	-0.0216743	-0.199172	-0.313685	0.686661	2.64032	8.07375	-0.558481	-0.373402	0.380141	-0.0069652	-0.167557
-94	0.668715	-0.0728247	-0.822413	0.674664	0.0715226	-1.2553	-2.80788	-2.60112	1.08261	0.699296	-0.154434	-0.829615	-0.332217	-0.425882	1.28517	2.71298	-0.290894	1.13687	0.0569149	0.305656	-0.0498377	-0.0178662	-1.32366	-0.185973	-0.217942	-0.17316	0.802471	0.00305758	-0.357161	-0.357014	0.059242	0.0639346	-0.449045	0.0110602	0.0807642	-0.0859252	-0.550081	-0.451202	-0.0247321	-0.112394	-0.295981	0.760504	3.93618	8.23791	-0.668646	-0.493194	0.347289	-0.0262447	-0.166747
-92	0.555304	-0.321062	-0.895086	0.631873	0.0555589	-1.27147	-3.12319	-2.2764	0.937809	0.581471	-0.187625	-0.792892	-0.26165	-0.432728	1.24868	2.50629	0.178029	1.83692	0.149082	0.170798	-0.0246286	-0.0583044	-1.4171	-0.273146	-0.254077	-0.197611	0.790604	-0.103538	-0.329808	-0.307166	0.0984171	0.0287579	-0.405886	-0.109443	0.13832	-0.11091	-0.507562	-0.187667	-0.0217727	-0.0259422	-0.272773	0.833045	5.26739	7.99669	-0.723108	-0.615022	0.314553	-0.0507392	-0.155916
-90	0.423285	-0.482835	-0.916305	0.55393	0.072208	-1.22354	-3.41963	-1.96441	0.702417	0.405389	-0.229673	-0.748524	-0.189486	-0.429891	1.14521	2.21797	0.623075	2.4919	0.239677	0.0182872	0.0182823	-0.110878	-1.47326	-0.34274	-0.274271	-0.217557	0.751252	-0.187989	-0.282302	-0.246891	0.195399	-0.0273018	-0.376	-0.229399	0.181603	-0.132267	-0.467328	0.0586159	-0.0148207	0.060305	-0.242408	0.904666	6.53862	7.37103	-0.712113	-0.721416	0.282773	-0.0805285	-0.136031
-88	0.259088	-0.599635	-0.875364	0.467839	0.118751	-1.11679	-3.63508	-1.67571	0.41761	0.17332	-0.283618	-0.703358	-0.125421	-0.418707	1.0114	1.89201	1.0086	3.07448	0.319447	-0.141002	0.0718773	-0.1689	-1.48886	-0.389031	-0.279849	-0.228327	0.679845	-0.238558	-0.230243	-0.181186	0.330356	-0.100957	-0.358539	-0.325197	0.206625	-0.145134	-0.430372	0.243509	-0.00752459	0.140142	-0.204237	0.966166	7.64462	6.42087	-0.637097	-0.789995	0.24825	-0.115693	-0.109122
-86	0.0517841	-0.718879	-0.758736	0.40748	0.189322	-0.964553	-3.71049	-1.4269	0.120086	-0.10467	-0.34934	-0.662426	-0.075253	-0.399842	0.876997	1.56843	1.3023	3.54891	0.380755	-0.295478	0.125796	-0.225238	-1.46342	-0.411145	-0.272567	-0.225969	0.577554	-0.249812	-0.188485	-0.116462	0.466989	-0.18704	-0.347697	-0.37531	0.211412	-0.147517	-0.396475	0.332761	-0.0034872	0.201709	-0.158643	1.00003	8.48513	5.23606	-0.510194	-0.798002	0.203499	-0.155758	-0.077586
-84	-0.203509	-0.877311	-0.555599	0.406674	0.270594	-0.786356	-3.60501	-1.23493	-0.165889	-0.412821	-0.422158	-0.627139	-0.0405953	-0.373382	0.757374	1.27986	1.48026	3.87782	0.419093	-0.434406	0.169339	-0.273222	-1.39926	-0.413168	-0.253949	-0.208243	0.449746	-0.223322	-0.168234	-0.0590502	0.5644	-0.27687	-0.334408	-0.368531	0.196609	-0.141493	-0.365	0.309602	-0.00456078	0.231679	-0.107215	0.986527	8.97983	3.92333	-0.351494	-0.728464	0.140319	-0.19938	-0.0438368
-82	-0.503236	-1.08856	-0.265811	0.490141	0.339764	-0.605079	-3.31103	-1.1091	-0.429264	-0.732201	-0.493214	-0.59469	-0.0194122	-0.339008	0.652438	1.05196	1.53426	4.03169	0.433618	-0.549028	0.194413	-0.307067	-1.30132	-0.40332	-0.225309	-0.175003	0.304885	-0.166942	-0.174333	-0.0136482	0.590457	-0.358044	-0.309562	-0.309395	0.165677	-0.132359	-0.335377	0.177028	-0.00992324	0.221266	-0.0529359	0.911829	9.08002	2.59101	-0.184919	-0.57624	0.0536531	-0.244299	-0.0103327
-80	-0.833814	-1.33906	0.0936102	0.665116	0.368048	-0.443455	-2.86298	-1.04809	-0.667397	-1.04293	-0.551654	-0.558777	-0.00728869	-0.296334	0.55106	0.904402	1.47741	3.99587	0.426751	-0.633274	0.197222	-0.32203	-1.17666	-0.392474	-0.188476	-0.128176	0.154018	-0.0928106	-0.203427	0.0177914	0.531601	-0.416461	-0.267544	-0.218551	0.12437	-0.12615	-0.307243	-0.0453055	-0.0164035	0.1713	-0.000103826	0.774063	8.77525	1.33438	-0.0336704	-0.35181	-0.0557028	-0.287471	0.0202756
-78	-1.17129	-1.59358	0.487387	0.916427	0.329847	-0.320609	-2.33308	-1.04487	-0.879746	-1.32587	-0.587647	-0.511378	0.000757953	-0.245574	0.438346	0.849623	1.34377	3.7719	0.403226	-0.684115	0.178228	-0.314632	-1.03335	-0.392356	-0.146668	-0.0716586	0.0101192	-0.0144783	-0.244025	0.0363567	0.395927	-0.440242	-0.208434	-0.127626	0.0795347	-0.126805	-0.280465	-0.327574	-0.019897	0.0938242	0.0462462	0.584319	8.0939	0.224532	0.0838251	-0.0809588	-0.180947	-0.325314	0.0451839
-76	-1.48313	-1.80814	0.868089	1.20693	0.213831	-0.249452	-1.81114	-1.09592	-1.06401	-1.5641	-0.594894	-0.445128	0.00833187	-0.18856	0.30267	0.888637	1.18074	3.37373	0.36915	-0.701579	0.140773	-0.283125	-0.879574	-0.413526	-0.104793	-0.0112128	-0.113351	0.0560989	-0.279101	0.0454931	0.209364	-0.423949	-0.137589	-0.070177	0.0376038	-0.134403	-0.255248	-0.636988	-0.0171554	0.00920951	0.0813897	0.362551	7.0984	-0.696941	0.156773	0.200181	-0.31164	-0.354074	0.0617947
-74	-1.73277	-1.94619	1.18819	1.48381	0.0301655	-0.235491	-1.37362	-1.20676	-1.21633	-1.74462	-0.571655	-0.355746	0.0162056	-0.129801	0.140253	1.00619	1.037	2.82295	0.331389	-0.688392	0.0893997	-0.228127	-0.723023	-0.463158	-0.0686696	0.0459139	-0.204523	0.110902	-0.290802	0.0495472	0.00731706	-0.371122	-0.0625753	-0.0718202	0.00329405	-0.145287	-0.23232	-0.943802	-0.00706099	-0.0602498	0.102092	0.130989	5.87619	-1.4169	0.183135	0.453508	-0.437253	-0.370269	0.0682732
-72	-1.88631	-1.99243	1.41402	1.68972	-0.190354	-0.27699	-1.05377	-1.38821	-1.33425	-1.86041	-0.520237	-0.243912	0.0219727	-0.0768804	-0.0437014	1.16871	0.950953	2.14687	0.297227	-0.649338	0.0287754	-0.153155	-0.570841	-0.542814	-0.0433322	0.091988	-0.254971	0.146915	-0.265619	0.0521199	-0.17487	-0.293814	0.011143	-0.142969	-0.0211113	-0.153905	-0.213018	-1.22551	0.00918936	-0.0977189	0.10747	-0.0915064	4.52786	-1.94476	0.168886	0.648068	-0.549964	-0.371199	0.0640128
-70	-1.91971	-1.95996	1.53639	1.77639	-0.405409	-0.365953	-0.827226	-1.64361	-1.41952	-1.91221	-0.445699	-0.115996	0.0210404	-0.0394465	-0.237068	1.32768	0.944259	1.38088	0.273925	-0.590545	-0.0364685	-0.0647392	-0.429749	-0.646936	-0.0311518	0.120376	-0.26051	0.165713	-0.197966	0.0549774	-0.30978	-0.209208	0.0834784	-0.276577	-0.0357861	-0.155396	-0.199088	-1.46928	0.0289558	-0.0972412	0.099221	-0.292016	3.15417	-2.30414	0.125671	0.766815	-0.645416	-0.355427	0.0497659
-68	-1.82463	-1.88748	1.57337	1.71717	-0.574583	-0.489318	-0.621777	-1.95364	-1.4781	-1.90897	-0.354727	0.0167132	0.00858558	-0.0265637	-0.425033	1.42874	1.02199	0.57249	0.267827	-0.518879	-0.101396	0.0281329	-0.305939	-0.762986	-0.0307042	0.12719	-0.220844	0.171866	-0.0907355	0.0580369	-0.382555	-0.134717	0.160001	-0.451352	-0.0428327	-0.147618	-0.192219	-1.67271	0.0494906	-0.0650596	0.081199	-0.463195	1.84365	-2.52466	0.0675326	0.808898	-0.721469	-0.323159	0.0273855
-66	-1.61121	-1.82675	1.56359	1.51483	-0.671619	-0.630208	-0.348964	-2.26758	-1.51675	-1.866	-0.255177	0.140217	-0.0184252	-0.0430939	-0.595009	1.42422	1.17714	-0.217507	0.282944	-0.441479	-0.160623	0.11534	-0.204453	-0.87382	-0.0370171	0.112252	-0.13882	0.170768	0.0470384	0.0603749	-0.392019	-0.0834434	0.248697	-0.638911	-0.0454713	-0.131726	-0.193438	-1.84247	0.0689611	-0.0164069	0.0585318	-0.601706	0.663157	-2.63515	0.00750323	0.787184	-0.776213	-0.276485	-0.000664941
-64	-1.30719	-1.82384	1.55188	1.20189	-0.691336	-0.769558	0.0561271	-2.50678	-1.53773	-1.80079	-0.155992	0.24088	-0.0601292	-0.0866528	-0.740587	1.28516	1.39549	-0.920317	0.319412	-0.36528	-0.208857	0.187581	-0.128078	-0.961838	-0.0432223	0.0789367	-0.0201668	0.166674	0.20394	0.0616028	-0.348791	-0.0614501	0.354531	-0.812095	-0.0472108	-0.11113	-0.202548	-1.99109	0.0866504	0.0307778	0.0365609	-0.707213	-0.346984	-2.65889	-0.0451447	0.722572	-0.806871	-0.219415	-0.0317688
-62	-0.953528	-1.90066	1.5724	0.833483	-0.649847	-0.888523	0.605187	-2.58	-1.53484	-1.72774	-0.0668641	0.308479	-0.11408	-0.146852	-0.863086	1.00881	1.65783	-1.4714	0.372482	-0.296353	-0.242044	0.238557	-0.0760433	-1.01355	-0.0430304	0.0330691	0.125995	0.161542	0.369372	0.0627332	-0.27135	-0.0672982	0.474445	-0.951656	-0.0511747	-0.0895116	-0.217743	-2.13253	0.102363	0.0624465	0.0197937	-0.782469	-1.1725	-2.61021	-0.0863995	0.637598	-0.810454	-0.157614	-0.0633796
-60	-0.597013	-2.04425	1.63577	0.474756	-0.579086	-0.971527	1.25061	-2.40521	-1.49351	-1.65396	0.00282699	0.338356	-0.176679	-0.207722	-0.969964	0.618934	1.93953	-1.82664	0.432702	-0.239093	-0.258585	0.266758	-0.0430449	-1.02285	-0.0330883	-0.0184942	0.286613	0.154939	0.534881	0.0659775	-0.181156	-0.0934245	0.595441	-1.0496	-0.0596481	-0.0689835	-0.23551	-2.27802	0.115536	0.0725065	0.0110224	-0.833664	-1.82024	-2.49228	-0.117402	0.551548	-0.785813	-0.0977023	-0.0929888
-58	-0.281308	-2.20872	1.72535	0.18709	-0.517707	-1.0091	1.90461	-1.93094	-1.39594	-1.57801	0.045575	0.332119	-0.244786	-0.252669	-1.07049	0.158601	2.21016	-1.97697	0.487548	-0.195511	-0.259919	0.276224	-0.019264	-0.992034	-0.0142955	-0.0689832	0.445431	0.144798	0.693584	0.07358	-0.0979683	-0.128498	0.697122	-1.10881	-0.0738277	-0.0493574	-0.250946	-2.43371	0.124676	0.0627785	0.0107932	-0.869753	-2.31087	-2.29598	-0.142765	0.478084	-0.735705	-0.0460855	-0.118003
-56	-0.0383055	-2.32981	1.80442	0.0164374	-0.500569	-0.999348	2.47287	-1.15222	-1.22962	-1.4924	0.0571677	0.296816	-0.316452	-0.26994	-1.17039	-0.322118	2.43607	-1.95568	0.524275	-0.165011	-0.250041	0.275927	0.00803024	-0.930398	0.00846963	-0.112299	0.585829	0.128548	0.838842	0.0863646	-0.0362647	-0.159968	0.75802	-1.13981	-0.0937174	-0.0287695	-0.258543	-2.60058	0.1275	0.0393486	0.0174573	-0.90011	-2.67129	-2.00066	-0.167863	0.425019	-0.667395	-0.00751074	-0.135783
-54	0.117627	-2.34653	1.83137	-0.0141955	-0.549044	-0.947273	2.88638	-0.118281	-0.995486	-1.38893	0.0373414	0.242925	-0.390315	-0.256187	-1.26786	-0.779213	2.58673	-1.83467	0.533164	-0.14488	-0.234032	0.277871	0.0512268	-0.851555	0.0281392	-0.143271	0.695324	0.104115	0.963643	0.102798	-0.00328593	-0.176353	0.763279	-1.15593	-0.118127	-0.00517304	-0.253306	-2.77611	0.121657	0.00761237	0.027934	-0.931137	-2.92826	-1.57749	-0.196109	0.395055	-0.591089	0.0161512	-0.144007
-52	0.190352	-2.22141	1.7767	0.0920723	-0.664525	-0.862274	3.11845	1.06934	-0.711897	-1.26455	-0.0104474	0.181722	-0.46402	-0.216652	-1.35314	-1.18366	2.64256	-1.70887	0.510126	-0.131392	-0.216208	0.294462	0.118252	-0.770346	0.0380569	-0.157949	0.769837	0.0705806	1.06151	0.119058	0.00123077	-0.169122	0.710543	-1.16827	-0.14479	0.0222225	-0.231857	-2.95644	0.1056	-0.031177	0.039023	-0.963369	-3.10351	-0.995934	-0.227291	0.386355	-0.516705	0.0263281	-0.141322
-50	0.197132	-1.9516	1.63516	0.306849	-0.827272	-0.754804	3.18262	2.27014	-0.412225	-1.12526	-0.0797683	0.122711	-0.532705	-0.162194	-1.4119	-1.52319	2.60087	-1.67277	0.457692	-0.121119	-0.198732	0.335839	0.209181	-0.700144	0.0343471	-0.154169	0.815263	0.028522	1.1285	0.130056	-0.0161443	-0.134204	0.611534	-1.18159	-0.170668	0.0522884	-0.193087	-3.13788	0.0791396	-0.0800995	0.0487652	-0.990613	-3.2098	-0.233113	-0.257657	0.3926	-0.45042	0.0270394	-0.128031
-48	0.160182	-1.56758	1.42876	0.581436	-1.00144	-0.633486	3.11715	3.32996	-0.136922	-0.985995	-0.162035	0.0717558	-0.588626	-0.104849	-1.43122	-1.79719	2.47713	-1.79564	0.38399	-0.11196	-0.181351	0.407699	0.315349	-0.650686	0.017138	-0.132313	0.8448	-0.0198415	1.16502	0.130995	-0.0448694	-0.0730199	0.488561	-1.19218	-0.192526	0.0822406	-0.138157	-3.31669	0.0435044	-0.143705	0.0572276	-1.00183	-3.24778	0.715706	-0.281624	0.403003	-0.392671	0.0232533	-0.106456
-46	0.0982513	-1.12084	1.20001	0.856178	-1.14505	-0.503497	2.96581	4.11473	0.0767575	-0.866033	-0.247267	0.0303995	-0.62245	-0.0540426	-1.40506	-2.00832	2.30158	-2.10374	0.300094	-0.103505	-0.162397	0.509882	0.421914	-0.626434	-0.0097107	-0.0959487	0.872621	-0.070713	1.17579	0.118894	-0.0735516	0.00721628	0.36718	-1.18831	-0.207703	0.108453	-0.0700054	-3.4873	0.00108431	-0.223972	0.0663324	-0.985174	-3.20349	1.828	-0.294364	0.40321	-0.338631	0.0190008	-0.0807371
-44	0.0217888	-0.666354	0.998564	1.07339	-1.22149	-0.366381	2.76422	4.54303	0.203522	-0.781378	-0.325022	-0.00342621	-0.625855	-0.0148301	-1.33664	-2.15567	2.11266	-2.5755	0.216758	-0.0966544	-0.140555	0.635731	0.513244	-0.625614	-0.0400442	-0.0519267	0.906653	-0.119163	1.16777	0.0936119	-0.0933442	0.0943238	0.267779	-1.1535	-0.214845	0.127315	0.00720976	-3.64006	-0.0448242	-0.317412	0.0788752	-0.932814	-3.04766	3.04927	-0.294244	0.377652	-0.280976	0.0161111	-0.0560416
-42	-0.0668401	-0.246482	0.86617	1.19105	-1.20873	-0.221029	2.53569	4.60424	0.234769	-0.737147	-0.385744	-0.0335729	-0.59443	0.0117726	-1.23681	-2.23332	1.94901	-3.15171	0.14172	-0.0926599	-0.11651	0.772326	0.578953	-0.640366	-0.067259	-0.00959587	0.944092	-0.160063	1.14678	0.0581142	-0.100832	0.173303	0.19929	-1.07172	-0.214222	0.135877	0.0883427	-3.76001	-0.0900893	-0.414726	0.0973438	-0.84454	-2.73785	4.29483	-0.28431	0.313143	-0.213666	0.0141302	-0.0374364
-40	-0.169348	0.118194	0.824903	1.1928	-1.10323	-0.0654164	2.29533	4.35304	0.178971	-0.723365	-0.42241	-0.0634187	-0.529649	0.0273301	-1.11974	-2.23448	1.84137	-3.7566	0.0783665	-0.0919988	-0.0937136	0.901756	0.617838	-0.658306	-0.0858412	0.0208979	0.972109	-0.189345	1.11468	0.0178992	-0.0994451	0.229543	0.157411	-0.933204	-0.207358	0.132309	0.167126	-3.82867	-0.129735	-0.502959	0.123232	-0.728842	-2.22463	5.45843	-0.272323	0.202675	-0.1349	0.0113677	-0.0287796
-38	-0.286631	0.42858	0.872288	1.09061	-0.918139	0.101364	2.0572	3.88162	0.0590258	-0.716415	-0.431925	-0.0940997	-0.439076	0.034583	-0.998474	-2.15867	1.8053	-4.32207	0.0258827	-0.0935412	-0.0779034	1.00365	0.637818	-0.665335	-0.0922685	0.030855	0.97355	-0.205134	1.0689	-0.0203021	-0.0986555	0.252306	0.127952	-0.738843	-0.196061	0.116282	0.236051	-3.82879	-0.158162	-0.568933	0.157158	-0.600717	-1.46193	6.42625	-0.269196	0.0480568	-0.047841	0.006438	-0.031927
-36	-0.415583	0.698786	0.984389	0.918741	-0.677666	0.277361	1.83868	3.28294	-0.0918543	-0.68591	-0.415637	-0.123965	-0.334584	0.0367173	-0.882804	-2.017	1.83634	-4.80596	-0.0195406	-0.0944403	-0.0756349	1.05881	0.651868	-0.648954	-0.0853616	0.0150948	0.934823	-0.208256	1.00448	-0.0502335	-0.110944	0.237431	0.0938377	-0.50138	-0.181308	0.0892107	0.286818	-3.75058	-0.169857	-0.602577	0.199474	-0.476801	-0.420638	7.09351	-0.285978	-0.139669	0.0411676	-0.000547817	-0.0463574
-34	-0.548591	0.944333	1.12516	0.721679	-0.410447	0.456928	1.65856	2.62339	-0.234947	-0.604249	-0.378712	-0.149438	-0.229113	0.03715	-0.779817	-1.83215	1.90941	-5.19848	-0.0630293	-0.0909324	-0.0923797	1.05339	0.671918	-0.601123	-0.0663392	-0.0268619	0.852158	-0.201828	0.917558	-0.0677498	-0.147438	0.188407	0.0428024	-0.242769	-0.162662	0.0541255	0.311669	-3.59627	-0.16061	-0.599283	0.250654	-0.36948	0.897162	7.38077	-0.330089	-0.342226	0.125814	-0.00770763	-0.0691646
-32	-0.675008	1.17234	1.25812	0.5407	-0.144096	0.631138	1.52941	1.9371	-0.331358	-0.454937	-0.328624	-0.1668	-0.133012	0.039255	-0.695625	-1.63215	1.98391	-5.51618	-0.109314	-0.0798661	-0.130811	0.982479	0.703681	-0.519981	-0.0386971	-0.0908533	0.733442	-0.190108	0.808502	-0.0718659	-0.213821	0.115494	-0.0274813	0.0115167	-0.138677	0.0150269	0.305407	-3.38006	-0.128876	-0.561045	0.310843	-0.282275	2.4471	7.24698	-0.402007	-0.53789	0.202678	-0.0120222	-0.095374
-30	-0.783363	1.37762	1.35577	0.403746	0.0983052	0.789249	1.44846	1.24033	-0.347556	-0.236507	-0.273372	-0.174009	-0.0512295	0.0456508	-0.635977	-1.44095	2.01355	-5.78781	-0.161199	-0.0603875	-0.189702	0.851988	0.744897	-0.410229	-0.00780547	-0.169201	0.595236	-0.177053	0.682935	-0.0648575	-0.308074	0.0332662	-0.108845	0.23904	-0.108223	-0.0241867	0.267373	-3.12262	-0.0767152	-0.496308	0.378536	-0.208543	4.13862	6.69722	-0.493858	-0.705806	0.272225	-0.0103617	-0.118661
-28	-0.863457	1.54516	1.4035	0.321323	0.300294	0.920547	1.39276	0.55264	-0.260057	0.0389692	-0.219948	-0.171691	0.0175571	0.0572139	-0.604533	-1.27067	1.95795	-6.03849	-0.218382	-0.0350141	-0.263659	0.678043	0.78773	-0.282333	0.0199539	-0.252361	0.456718	-0.165147	0.550319	-0.0513754	-0.420902	-0.0426463	-0.18655	0.42519	-0.0721008	-0.0608228	0.20243	-2.84176	-0.0097994	-0.418332	0.44908	-0.13441	5.84112	5.78329	-0.590814	-0.829634	0.337592	-0.000272935	-0.1326
-26	-0.908116	1.65635	1.39796	0.288375	0.453351	1.01586	1.32207	-0.0905976	-0.0580828	0.351454	-0.173282	-0.16289	0.0794905	0.0723907	-0.599797	-1.11986	1.79187	-6.27776	-0.276854	-0.0094772	-0.343731	0.483822	0.823979	-0.150696	0.0384882	-0.330577	0.333344	-0.15485	0.420829	-0.0368977	-0.538518	-0.0987583	-0.245598	0.564461	-0.034018	-0.094059	0.120261	-2.54316	0.0637375	-0.341863	0.514052	-0.0451708	7.40057	4.59642	-0.675114	-0.899746	0.402127	0.019788	-0.132376
-24	-0.914575	1.69525	1.3424	0.289986	0.557505	1.06844	1.18888	-0.642171	0.256211	0.679959	-0.135695	-0.15173	0.142287	0.0873275	-0.613321	-0.97845	1.50917	-6.49387	-0.329203	0.00879514	-0.418842	0.294502	0.85027	-0.0308736	0.0433775	-0.395237	0.232604	-0.144703	0.301937	-0.0260781	-0.646483	-0.126255	-0.276457	0.658228	-0.000267708	-0.12484	0.0329582	-2.215	0.135299	-0.278601	0.562342	0.0671716	8.66318	3.25281	-0.731289	-0.913894	0.467296	0.0505939	-0.116497
-22	-0.885261	1.65229	1.2426	0.308052	0.6206	1.07456	0.951845	-1.05938	0.669055	1.00842	-0.10684	-0.141565	0.211529	0.0969064	-0.631498	-0.836535	1.12089	-6.65448	-0.365945	0.0130575	-0.477845	0.13162	0.870415	0.0639219	0.0327881	-0.439908	0.153124	-0.131925	0.196095	-0.0215465	-0.732951	-0.12253	-0.277849	0.710757	0.021961	-0.15499	-0.0483266	-1.82916	0.19795	-0.232925	0.582969	0.198407	9.50062	1.87485	-0.750642	-0.876753	0.532155	0.0921891	-0.0877068
-20	-0.827682	1.52543	1.10579	0.326448	0.655623	1.03415	0.587692	-1.32158	1.15649	1.32883	-0.0842114	-0.133332	0.287978	0.0963297	-0.640943	-0.691442	0.649858	-6.71257	-0.377676	-0.000440923	-0.511831	0.00846605	0.893618	0.126292	0.00752438	-0.461026	0.0871533	-0.113297	0.100286	-0.0234792	-0.790073	-0.0915622	-0.255895	0.725914	0.0269875	-0.185863	-0.116338	-1.34917	0.247804	-0.199915	0.568724	0.3315	9.83042	0.572049	-0.73332	-0.798854	0.594448	0.143499	-0.052448
-18	-0.753379	1.3201	0.942455	0.33354	0.676356	0.951721	0.0982914	-1.43891	1.68508	1.64127	-0.0641765	-0.124786	0.366863	0.0827389	-0.634752	-0.548971	0.124772	-6.61643	-0.357463	-0.0311391	-0.516184	-0.0720862	0.929527	0.156974	-0.0297197	-0.458216	0.0254911	-0.0861949	0.00755374	-0.0299123	-0.813316	-0.0429973	-0.220687	0.706365	0.0127246	-0.217105	-0.168995	-0.742588	0.28411	-0.167074	0.519164	0.441938	9.627	-0.573758	-0.68735	-0.695198	0.652364	0.201615	-0.0188203
-16	-0.676354	1.0491	0.768641	0.322223	0.692724	0.837168	-0.488347	-1.4491	2.21249	1.95094	-0.0432298	-0.111054	0.439184	0.056467	-0.615847	-0.418277	-0.423848	-6.32216	-0.302769	-0.0743126	-0.491791	-0.116615	0.982875	0.165015	-0.0753833	-0.434159	-0.0368696	-0.0496575	-0.0899587	-0.0375052	-0.799552	0.0101601	-0.182348	0.655444	-0.0184576	-0.246168	-0.208398	0.00580528	0.308084	-0.119383	0.441601	0.507446	8.92202	-1.51589	-0.625181	-0.583511	0.705593	0.261258	0.00617756
-14	-0.611498	0.732626	0.606183	0.288615	0.707723	0.705681	-1.12284	-1.406	2.68933	2.26319	-0.0188994	-0.0865326	0.494371	0.0216804	-0.595129	-0.303938	-0.965387	-5.80645	-0.2164	-0.122499	-0.444933	-0.137464	1.05057	0.165568	-0.125712	-0.394054	-0.0965888	-0.00518018	-0.19728	-0.0423978	-0.745388	0.0549392	-0.148417	0.580247	-0.0604057	-0.268981	-0.238064	0.884184	0.321196	-0.0455049	0.349541	0.517913	7.79556	-2.24221	-0.559207	-0.481934	0.754855	0.315	0.0188762
-12	-0.573215	0.39713	0.479213	0.230678	0.717261	0.576253	-1.74395	-1.36614	3.06342	2.57761	0.0101659	-0.0476109	0.523423	-0.013801	-0.585447	-0.200495	-1.46967	-5.07601	-0.106339	-0.167484	-0.385694	-0.147791	1.12257	0.176069	-0.176813	-0.344796	-0.141458	0.0431937	-0.313338	-0.0409418	-0.647018	0.0820216	-0.123288	0.493695	-0.105003	-0.281648	-0.259725	1.85044	0.323856	0.0577234	0.259113	0.480596	6.36136	-2.7681	-0.497991	-0.406144	0.800124	0.354486	0.0196436
-10	-0.573978	0.0721248	0.407557	0.147512	0.712808	0.468647	-2.29112	-1.37729	3.28654	2.88297	0.0449231	0.00484786	0.521745	-0.0397003	-0.595029	-0.0932156	-1.9077	-4.17048	0.0153327	-0.202001	-0.325237	-0.157327	1.18581	0.212123	-0.224373	-0.293927	-0.154533	0.0898524	-0.42936	-0.0302686	-0.501937	0.0883239	-0.109121	0.413839	-0.14429	-0.282423	-0.271285	2.83712	0.31527	0.184415	0.184885	0.417482	4.74963	-3.12606	-0.444522	-0.366288	0.838651	0.372397	0.0119234
-8	-0.622383	-0.214677	0.3994	0.0394161	0.68527	0.399416	-2.71747	-1.47059	3.32238	3.15533	0.0868961	0.0644961	0.491046	-0.0454748	-0.624265	0.0348877	-2.25333	-3.15735	0.134134	-0.220565	-0.272819	-0.170355	1.22877	0.284285	-0.26366	-0.248357	-0.121829	0.129583	-0.529859	-0.00872222	-0.311622	0.0774944	-0.106904	0.360107	-0.172073	-0.272891	-0.266878	3.76407	0.294514	0.322278	0.136531	0.355589	3.08998	-3.35521	-0.396917	-0.364591	0.864216	0.364511	0.000333008
-6	-0.720707	-0.44217	0.446339	-0.0915634	0.628063	0.377969	-2.99947	-1.65606	3.15397	3.36075	0.138551	0.120723	0.439762	-0.0230252	-0.667257	0.193303	-2.48534	-2.12014	0.235324	-0.219406	-0.233624	-0.186343	1.24486	0.396238	-0.290234	-0.212837	-0.0402816	0.159837	-0.596256	0.0238895	-0.0835499	0.058146	-0.116556	0.347924	-0.184618	-0.257521	-0.238941	4.55599	0.262251	0.457023	0.117289	0.314792	1.49677	-3.49319	-0.350944	-0.39458	0.868509	0.331143	-0.0110964
-4	-0.862676	-0.598592	0.52332	-0.240849	0.53823	0.40386	-3.14024	-1.92215	2.78864	3.4628	0.202569	0.161888	0.381606	0.0309606	-0.716386	0.376444	-2.58934	-1.1435	0.306355	-0.195924	-0.20817	-0.202357	1.23335	0.544242	-0.301255	-0.18848	0.0782538	0.182233	-0.612059	0.0663586	0.168856	0.040704	-0.135882	0.384121	-0.180599	-0.241563	-0.181265	5.1605	0.222085	0.576282	0.124265	0.299266	0.0582497	-3.57134	-0.303075	-0.442519	0.844441	0.277444	-0.0197854
-2	-1.03265	-0.681279	0.594345	-0.400503	0.416065	0.466318	-3.16514	-2.23999	2.25929	3.43272	0.280167	0.179356	0.33232	0.113888	-0.766341	0.561887	-2.55906	-0.299403	0.33937	-0.148363	-0.193368	-0.215696	1.19846	0.717489	-0.296746	-0.171962	0.209609	0.202409	-0.567702	0.116514	0.428661	0.0343281	-0.159158	0.465219	-0.160725	-0.2282	-0.0916577	5.5611	0.180748	0.671574	0.149976	0.29679	-1.16928	-3.61296	-0.252801	-0.490847	0.790092	0.212433	-0.0245257
0	-1.20722	-0.694275	0.622674	-0.558752	0.264731	0.546575	-3.11165	-2.57126	1.62103	3.2585	0.369234	0.170674	0.305401	0.217683	-0.814907	0.715105	-2.3971	0.362453	0.333161	-0.0762252	-0.184529	-0.225417	1.14749	0.899224	-0.28002	-0.156092	0.325687	0.228033	-0.463254	0.171839	0.679195	0.0451153	-0.176534	0.579254	-0.127423	-0.216377	0.0267369	5.78041	0.146798	0.738145	0.184409	0.286178	-2.16183	-3.63378	-0.203422	-0.522611	0.711413	0.146994	-0.0249493
2	-1.35931	-0.645756	0.582461	-0.70057	0.0910108	0.622761	-3.01769	-2.87614	0.943018	2.9493	0.463267	0.140644	0.308134	0.330398	-0.860383	0.798568	-2.11577	0.818653	0.293808	0.0185436	-0.177362	-0.232245	1.08899	1.06885	-0.256851	-0.131948	0.404282	0.265665	-0.308196	0.229869	0.90741	0.0759077	-0.17507	0.709952	-0.0846082	-0.200523	0.165722	5.87185	0.128174	0.773595	0.217066	0.249073	-2.92336	-3.64354	-0.161194	-0.525437	0.622174	0.0913804	-0.0211338
4	-1.4637	-0.547003	0.467949	-0.809992	-0.0931965	0.676111	-2.91285	-3.1167	0.296732	2.53347	0.551822	0.0999618	0.339372	0.438264	-0.897947	0.781695	-1.73729	1.07116	0.233391	0.130133	-0.169227	-0.237383	1.03146	1.20522	-0.233517	-0.0919308	0.435006	0.317707	-0.118846	0.28802	1.10539	0.127131	-0.14135	0.840971	-0.0372886	-0.172458	0.313494	5.90189	0.129427	0.776535	0.238845	0.180483	-3.47813	-3.64776	-0.13323	-0.493777	0.540781	0.0528658	-0.0136157
6	-1.50213	-0.413247	0.296931	-0.874154	-0.270389	0.69633	-2.81493	-3.2537	-0.257113	2.05083	0.622615	0.0620773	0.38988	0.527646	-0.917929	0.648555	-1.29313	1.14301	0.166821	0.248095	-0.159487	-0.241179	0.982754	1.29078	-0.214424	-0.0324973	0.418364	0.380683	0.0851897	0.342954	1.26966	0.197699	-0.0649319	0.958262	0.00923494	-0.124737	0.456601	5.92848	0.149611	0.746198	0.243627	0.0933135	-3.86191	-3.64931	-0.124782	-0.429003	0.485013	0.0341432	-0.0036648
8	-1.46632	-0.265206	0.107077	-0.887881	-0.419651	0.68383	-2.73159	-3.24021	-0.679589	1.54265	0.664708	0.0394185	0.445118	0.586837	-0.907649	0.401576	-0.821377	1.0725	0.107694	0.358035	-0.149201	-0.242463	0.949828	1.31564	-0.200245	0.0446485	0.359453	0.445521	0.284158	0.390007	1.39897	0.285286	0.0584155	1.05009	0.0505225	-0.0539707	0.581906	5.98343	0.181727	0.683216	0.229386	0.0150515	-4.11396	-3.64948	-0.136646	-0.337781	0.466668	0.0328972	0.00655169
10	-1.35824	-0.129412	-0.0540134	-0.856824	-0.521624	0.647685	-2.66462	-3.01931	-0.959423	1.04324	0.671727	0.0401265	0.489354	0.607829	-0.85622	0.060982	-0.362414	0.907444	0.0646059	0.444071	-0.140504	-0.23879	0.938795	1.28	-0.187365	0.133336	0.261204	0.49975	0.460306	0.423407	1.49191	0.385884	0.224522	1.10597	0.0841069	0.0372631	0.678352	6.06451	0.214133	0.591059	0.198447	-0.0218967	-4.27103	-3.64869	-0.163506	-0.229798	0.488085	0.0426532	0.0142248
12	-1.18858	-0.0359732	-0.142213	-0.797367	-0.564345	0.600065	-2.61449	-2.53275	-1.11201	0.575978	0.643896	0.0661031	0.509584	0.587993	-0.759994	-0.339496	0.0464547	0.700418	0.0393278	0.49263	-0.135796	-0.22733	0.954724	1.19375	-0.168988	0.22514	0.122333	0.530821	0.599164	0.43759	1.54518	0.493131	0.420184	1.11648	0.110022	0.140625	0.738543	6.1396	0.233728	0.477161	0.15665	0.0077138	-4.36377	-3.64688	-0.193927	-0.115732	0.541586	0.0546752	0.016625
14	-0.974562	-0.0135174	-0.129957	-0.732829	-0.547173	0.549808	-2.58328	-1.74147	-1.17205	0.154182	0.588027	0.112755	0.497941	0.531146	-0.626004	-0.759654	0.376141	0.50501	0.0274804	0.496475	-0.136766	-0.205891	1.00097	1.0732	-0.137588	0.311902	-0.0580699	0.529453	0.690343	0.429236	1.55318	0.598122	0.624323	1.07507	0.130415	0.244086	0.760056	6.16053	0.229986	0.352758	0.111537	0.112084	-4.4155	-3.64369	-0.212366	-0.00582565	0.611642	0.0603912	0.012051
16	-0.738222	-0.0822239	-0.0153698	-0.687186	-0.480899	0.498314	-2.57511	-0.651031	-1.18237	-0.215054	0.515404	0.170433	0.45218	0.447291	-0.471751	-1.16117	0.609634	0.372626	0.0213182	0.45752	-0.143301	-0.173715	1.07794	0.936121	-0.0878366	0.387516	-0.271881	0.491983	0.728006	0.399111	1.50892	0.690243	0.811015	0.981334	0.148371	0.334895	0.746175	6.08076	0.198492	0.231006	0.07009	0.278221	-4.44251	-3.63863	-0.202973	0.0912122	0.678668	0.0536881	0.000623287
18	-0.504833	-0.246596	0.175321	-0.678642	-0.384159	0.439742	-2.59391	0.669749	-1.18203	-0.527017	0.438349	0.227174	0.374795	0.350746	-0.321266	-1.51537	0.743759	0.349023	0.0134	0.387178	-0.152642	-0.131844	1.18162	0.797084	-0.0189253	0.448576	-0.494897	0.4211	0.710824	0.352759	1.40609	0.759118	0.954168	0.843919	0.166559	0.402266	0.705592	5.87054	0.142661	0.123854	0.0368394	0.474781	-4.45521	-3.63125	-0.154288	0.169316	0.723227	0.0324899	-0.0154193
20	-0.300516	-0.490126	0.393269	-0.715231	-0.27803	0.365185	-2.63881	2.08797	-1.19717	-0.777586	0.366834	0.271959	0.272012	0.257082	-0.198809	-1.80806	0.788315	0.470267	-0.000330938	0.303724	-0.159239	-0.0830998	1.3025	0.664797	0.0645673	0.494099	-0.686926	0.324878	0.641322	0.29964	1.24187	0.797191	1.03308	0.680957	0.186461	0.43895	0.650744	5.52511	0.0729373	0.0388967	0.0130539	0.660575	-4.45964	-3.62124	-0.0634789	0.226173	0.729775	-0.00072486	-0.0320615
22	-0.148421	-0.774152	0.579476	-0.793551	-0.181133	0.268358	-2.6985	3.42739	-1.23638	-0.963892	0.306418	0.297449	0.153652	0.179906	-0.122323	-2.03994	0.762425	0.758375	-0.0191684	0.227235	-0.155731	-0.0317163	1.4258	0.542004	0.153537	0.524847	-0.801224	0.214619	0.524887	0.250983	1.01979	0.802029	1.03751	0.517268	0.208641	0.441491	0.594918	5.06482	0.00373348	-0.0223097	-0.00275402	0.795515	-4.45885	-3.60848	0.0612451	0.263834	0.689468	-0.0395043	-0.0444124
24	-0.0640992	-1.04269	0.680987	-0.900418	-0.106683	0.149763	-2.74765	4.5057	-1.29168	-1.08621	0.258163	0.301231	0.0338716	0.12851	-0.0986472	-2.22215	0.688659	1.21736	-0.03832	0.173675	-0.135012	0.0172672	1.53338	0.42718	0.236577	0.542632	-0.800678	0.102373	0.369083	0.217091	0.751548	0.777318	0.970567	0.378974	0.233806	0.409582	0.548884	4.52925	-0.0508051	-0.063622	-0.0133424	0.8503	-4.45404	-3.59293	0.201028	0.288275	0.601702	-0.0749081	-0.047919
26	-0.0518299	-1.23341	0.66576	-1.0164	-0.0616268	0.017368	-2.74861	5.17684	-1.34419	-1.14943	0.220278	0.285189	-0.0684555	0.106876	-0.121793	-2.36878	0.586456	1.8305	-0.0511869	0.150169	-0.0928463	0.0587515	1.60752	0.316739	0.302782	0.549745	-0.674133	-0.000969791	0.183843	0.204896	0.45698	0.731962	0.848191	0.28725	0.263804	0.34518	0.518206	3.9688	-0.0807335	-0.091629	-0.0210392	0.812021	-4.44548	-3.57405	0.329795	0.307786	0.474011	-0.097572	-0.039583
28	-0.1037	-1.29257	0.530918	-1.12003	-0.0472136	-0.116169	-2.66078	5.36549	-1.37286	-1.16301	0.190518	0.253495	-0.131365	0.11382	-0.174504	-2.48927	0.467054	2.55944	-0.0522369	0.153162	-0.0300505	0.0883361	1.6355	0.206805	0.344291	0.548452	-0.445285	-0.0864301	-0.0175314	0.216354	0.161865	0.677512	0.695062	0.253048	0.301558	0.251963	0.502253	3.43682	-0.082704	-0.112247	-0.0266029	0.684796	-4.4333	-3.54978	0.420059	0.330704	0.320212	-0.0999635	-0.0188686
30	-0.202035	-1.18948	0.301207	-1.19167	-0.0602745	-0.238039	-2.45566	5.08417	-1.36333	-1.13949	0.168127	0.210403	-0.134298	0.143761	-0.232379	-2.58347	0.331884	3.34594	-0.0393121	0.170109	0.0467674	0.102978	1.61341	0.094422	0.357898	0.54058	-0.169171	-0.14662	-0.217347	0.248005	-0.106105	0.624971	0.538198	0.274151	0.349571	0.135352	0.495313	2.98363	-0.0602346	-0.12829	-0.0290454	0.486368	-4.41808	-3.51501	0.449693	0.363312	0.157216	-0.0783674	0.0119789
32	-0.324131	-0.925814	0.018337	-1.21655	-0.0948485	-0.339506	-2.13178	4.42906	-1.31415	-1.09218	0.154375	0.159148	-0.0645479	0.187774	-0.269358	-2.64094	0.175003	4.11697	-0.0145073	0.183996	0.126478	0.101477	1.54753	-0.0213931	0.3454	0.52737	0.0833494	-0.17506	-0.393625	0.291814	-0.322137	0.582366	0.40027	0.335237	0.407612	0.00293646	0.489285	2.65155	-0.0220297	-0.139118	-0.0262805	0.242758	-4.40118	-3.45965	0.407768	0.408536	0.00147993	-0.0340832	0.0483834
34	-0.447293	-0.536466	-0.274176	-1.18668	-0.143903	-0.418398	-1.72133	3.55581	-1.23801	-1.03288	0.15152	0.102456	0.0768631	0.234978	-0.263296	-2.64394	-0.0115304	4.79398	0.0166227	0.178963	0.196443	0.0847394	1.45241	-0.138565	0.312678	0.509743	0.247239	-0.166098	-0.522173	0.337219	-0.468709	0.554065	0.294686	0.411065	0.470939	-0.135038	0.476815	2.46972	0.0208718	-0.142299	-0.0160942	-0.0169093	-4.38481	-3.36694	0.297683	0.465582	-0.133782	0.0266191	0.0846309
36	-0.552438	-0.0817869	-0.544298	-1.10173	-0.200705	-0.479455	-1.28266	2.64128	-1.15758	-0.969894	0.16083	0.0440626	0.272731	0.274457	-0.200614	-2.57265	-0.231643	5.30572	0.0470732	0.145026	0.246184	0.0557381	1.34603	-0.251216	0.267832	0.488967	0.282315	-0.116061	-0.580617	0.37401	-0.538348	0.541848	0.223717	0.472247	0.530345	-0.265604	0.453591	2.448	0.0580938	-0.136042	0.0030816	-0.264128	-4.37154	-3.2125	0.136413	0.530274	-0.239944	0.0939334	0.115483
38	-0.62565	0.366035	-0.777907	-0.968988	-0.259248	-0.532839	-0.879532	1.84098	-1.09717	-0.906869	0.180852	-0.0101587	0.492235	0.297631	-0.0792271	-2.41044	-0.480766	5.60258	0.070699	0.080441	0.270264	0.019065	1.24402	-0.35004	0.218946	0.467336	0.182311	-0.0254608	-0.553471	0.395273	-0.534166	0.546775	0.179928	0.492498	0.574401	-0.373809	0.419061	2.57183	0.0821687	-0.120857	0.0318269	-0.473157	-4.36357	-2.96507	-0.0500656	0.595841	-0.312928	0.15701	0.13766
40	-0.658284	0.738357	-0.97716	-0.80251	-0.313452	-0.591253	-0.554934	1.25435	-1.07318	-0.842486	0.207043	-0.0526938	0.697974	0.300483	0.0907965	-2.14843	-0.744011	5.66818	0.0839003	-0.00872534	0.269309	-0.0199599	1.15508	-0.424205	0.172124	0.448401	-0.0286062	0.0987859	-0.436691	0.399384	-0.468227	0.570489	0.150247	0.455608	0.593074	-0.444493	0.375568	2.8009	0.0895551	-0.0994403	0.0697213	-0.622408	-4.36175	-2.58961	-0.233884	0.653988	-0.352314	0.206724	0.150632
42	-0.646713	0.983494	-1.15344	-0.621257	-0.355694	-0.666166	-0.3115	0.908528	-1.08699	-0.771652	0.233135	-0.0766323	0.85508	0.28478	0.289068	-1.78893	-0.996954	5.52379	0.086187	-0.111169	0.24902	-0.0564909	1.07943	-0.464402	0.130405	0.436363	-0.308782	0.242548	-0.24017	0.39024	-0.358569	0.614961	0.121423	0.360175	0.581129	-0.464972	0.326583	3.07432	0.0804648	-0.0749408	0.115413	-0.696125	-4.36481	-2.05314	-0.392596	0.696191	-0.36023	0.237777	0.156455
44	-0.592478	1.07573	-1.3193	-0.446142	-0.376005	-0.763816	-0.107899	0.764916	-1.12302	-0.688183	0.25364	-0.0784645	0.939346	0.25763	0.488869	-1.34782	-1.20845	5.22301	0.0797162	-0.213836	0.217959	-0.0873143	1.01063	-0.46584	0.093776	0.434723	-0.614864	0.386091	0.0128369	0.375499	-0.22604	0.680686	0.0852332	0.22044	0.539819	-0.428075	0.274993	3.32185	0.0578975	-0.0487596	0.166617	-0.686946	-4.3688	-1.3325	-0.514296	0.714987	-0.340396	0.249464	0.158782
46	-0.502751	1.01861	-1.48288	-0.296286	-0.363305	-0.882067	0.126621	0.743997	-1.15296	-0.588332	0.266212	-0.0596334	0.941975	0.229353	0.662454	-0.854916	-1.345	4.83765	0.0682927	-0.30504	0.185297	-0.111516	0.939645	-0.429951	0.0601373	0.444663	-0.913823	0.508048	0.289376	0.363476	-0.0918186	0.764274	0.0417643	0.0625959	0.476268	-0.334612	0.222244	3.47802	0.0263687	-0.0192958	0.220104	-0.598913	-4.36682	-0.422863	-0.598909	0.704998	-0.29743	0.244968	0.161505
48	-0.390377	0.841803	-1.64586	-0.185263	-0.309006	-1.00938	0.46583	0.756716	-1.14468	-0.473721	0.272619	-0.0256732	0.869963	0.210276	0.786519	-0.35113	-1.37657	4.43945	0.0563306	-0.376403	0.159299	-0.130354	0.859293	-0.364114	0.0267441	0.463891	-1.18763	0.590509	0.552632	0.359953	0.0242598	0.856928	-0.000445561	-0.0825036	0.401036	-0.194285	0.168665	3.49407	-0.00931724	0.0174739	0.271843	-0.449512	-4.34878	0.655291	-0.655562	0.663506	-0.236369	0.229654	0.167496
50	-0.272601	0.591621	-1.80375	-0.118343	-0.211678	-1.1268	0.959112	0.730377	-1.07297	-0.352161	0.277794	0.0167231	0.742692	0.207502	0.846755	0.11853	-1.28313	4.08428	0.047982	-0.423444	0.146555	-0.146368	0.767341	-0.279654	-0.00843536	0.486503	-1.43098	0.623305	0.768343	0.366192	0.105055	0.944966	-0.0275982	-0.187872	0.325075	-0.0244527	0.114669	3.34441	-0.0450725	0.0656858	0.317388	-0.268946	-4.30095	1.85292	-0.6974	0.590647	-0.16234	0.209144	0.177797
52	-0.168112	0.316966	-1.94706	-0.0915154	-0.0802312	-1.21283	1.6129	0.622491	-0.928383	-0.235713	0.287444	0.0629448	0.586292	0.222685	0.84062	0.514843	-1.06074	3.80357	0.0463575	-0.445175	0.151296	-0.162082	0.667332	-0.188966	-0.0458074	0.504055	-1.6452	0.60587	0.910168	0.378844	0.137697	1.01262	-0.0260508	-0.237166	0.257268	0.153141	0.0620895	3.02706	-0.0782188	0.126568	0.352394	-0.0955002	-4.20533	3.0944	-0.736032	0.489446	-0.0803148	0.187922	0.19137
54	-0.0928832	0.0550037	-2.06231	-0.0925007	0.0667467	-1.24976	2.38581	0.423393	-0.721327	-0.136708	0.305395	0.11194	0.427684	0.251526	0.777721	0.813822	-0.725016	3.60475	0.0527338	-0.443289	0.174272	-0.178871	0.567334	-0.102768	-0.0837827	0.507514	-1.83217	0.546119	0.962923	0.391553	0.115452	1.04627	0.0121276	-0.227372	0.203197	0.316794	0.0147421	2.56018	-0.107792	0.196172	0.373014	0.0325431	-4.0392	4.28499	-0.777591	0.365705	0.00510585	0.168862	0.205421
56	-0.0560174	-0.177751	-2.1333	-0.103453	0.20616	-1.22914	3.1968	0.152644	-0.479782	-0.0635734	0.331866	0.164928	0.28979	0.285131	0.677485	1.01162	-0.310291	3.47821	0.0658766	-0.421376	0.21135	-0.196418	0.477432	-0.0282082	-0.11886	0.489512	-1.99067	0.457109	0.923363	0.397356	0.0393379	1.03836	0.085662	-0.166892	0.165106	0.449099	-0.0222907	1.97709	-0.134431	0.265117	0.376043	0.0862121	-3.77524	5.3226	-0.821529	0.22753	0.0898615	0.153556	0.216212
58	-0.0570929	-0.384555	-2.14295	-0.104836	0.318306	-1.15421	3.94251	-0.146599	-0.241103	-0.0184416	0.36333	0.222174	0.188617	0.312755	0.564418	1.12239	0.135964	3.40629	0.0818422	-0.384272	0.252824	-0.213004	0.406955	0.0318311	-0.146082	0.446234	-2.11612	0.353044	0.798982	0.390782	-0.0812843	0.989496	0.183987	-0.0704857	0.142641	0.539816	-0.0444437	1.32125	-0.159934	0.320818	0.358921	0.0531535	-3.383	6.11169	-0.86206	0.0841989	0.170434	0.142928	0.220172
60	-0.0861106	-0.577657	-2.07607	-0.0799052	0.394124	-1.03815	4.51894	-0.414864	-0.0402861	0.00233783	0.393759	0.279966	0.132139	0.325044	0.462092	1.16995	0.562058	3.37048	0.0946212	-0.337379	0.284572	-0.226452	0.362116	0.0782639	-0.159852	0.378498	-2.20262	0.246145	0.605663	0.368956	-0.229732	0.907665	0.290468	0.0462004	0.133876	0.586709	-0.0496475	0.640653	-0.186672	0.351553	0.319889	-0.0597399	-2.83206	6.57666	-0.891344	-0.0555589	0.243551	0.1376	0.215012
62	-0.126253	-0.762708	-1.92219	-0.019076	0.438565	-0.898973	4.84304	-0.587685	0.101258	0.0051467	0.416453	0.329971	0.120438	0.316746	0.387662	1.17717	0.921818	3.35503	0.0976775	-0.28576	0.291472	-0.235347	0.344379	0.114438	-0.155112	0.291804	-2.24601	0.14515	0.365025	0.331633	-0.38468	0.80505	0.387473	0.1701	0.136304	0.594426	-0.0394248	-0.018568	-0.217028	0.350777	0.258588	-0.229245	-2.09692	6.67256	-0.903035	-0.185296	0.305632	0.137718	0.200457
64	-0.158628	-0.92642	-1.67821	0.0768229	0.468686	-0.752974	4.86992	-0.61237	0.182054	-0.00479724	0.425542	0.361691	0.146646	0.288108	0.34872	1.15805	1.18255	3.34782	0.0859987	-0.233075	0.262207	-0.240012	0.349718	0.144348	-0.128684	0.195394	-2.24634	0.0553169	0.101943	0.280598	-0.523986	0.693786	0.461179	0.29117	0.147595	0.572127	-0.0184711	-0.619	-0.252911	0.319792	0.17702	-0.422974	-1.16311	6.39158	-0.894946	-0.301699	0.352284	0.142436	0.178342
66	-0.167431	-1.03425	-1.35028	0.195617	0.507384	-0.60933	4.60178	-0.467227	0.219318	-0.025998	0.416656	0.366932	0.198426	0.244621	0.343375	1.11575	1.32961	3.33978	0.0579809	-0.180682	0.193622	-0.242795	0.368978	0.170935	-0.0803717	0.100513	-2.20882	-0.0207398	-0.157795	0.21898	-0.628722	0.582549	0.504353	0.40058	0.165969	0.530756	0.00709313	-1.13743	-0.295312	0.26756	0.0804215	-0.608102	-0.0336385	5.76423	-0.869928	-0.403966	0.378312	0.149517	0.152035
68	-0.143852	-1.04006	-0.954709	0.316032	0.575303	-0.467562	4.08579	-0.175534	0.240538	-0.0603874	0.38688	0.343995	0.260001	0.195305	0.363212	1.04646	1.36718	3.32384	0.0164739	-0.127306	0.0926845	-0.247501	0.389578	0.194902	-0.0133632	0.0182387	-2.14285	-0.0820132	-0.390064	0.150807	-0.686396	0.475374	0.516443	0.488498	0.190105	0.480739	0.0319233	-1.56716	-0.343889	0.207718	-0.0226044	-0.758846	1.26547	4.85503	-0.834683	-0.491849	0.378525	0.155493	0.125389
70	-0.087574	-0.903984	-0.517824	0.413007	0.683627	-0.318436	3.40069	0.194403	0.271523	-0.110211	0.334573	0.299477	0.314704	0.150169	0.397669	0.945997	1.31569	3.29347	-0.0314077	-0.0695305	-0.0249647	-0.258105	0.398507	0.214234	0.0662832	-0.0426773	-2.05978	-0.128211	-0.575458	0.0807978	-0.692604	0.372968	0.501619	0.543271	0.218717	0.430507	0.0530815	-1.9163	-0.396684	0.154134	-0.121112	-0.860782	2.68194	3.75284	-0.796937	-0.563328	0.349176	0.156492	0.101583
72	-0.00564785	-0.611068	-0.073858	0.46472	0.829842	-0.147664	2.63578	0.546893	0.326101	-0.173728	0.259619	0.246749	0.347862	0.117718	0.4381	0.814639	1.20677	3.24049	-0.0757154	-0.00304809	-0.139432	-0.277167	0.385887	0.224422	0.150882	-0.0774635	-1.97023	-0.159069	-0.702416	0.0141247	-0.65097	0.275541	0.466149	0.552829	0.250061	0.38583	0.0704988	-2.20278	-0.450148	0.116868	-0.203916	-0.911335	4.13759	2.55759	-0.761996	-0.613307	0.289412	0.149389	0.0822172
74	0.0904841	-0.182918	0.339345	0.459082	0.997531	0.0588757	1.86875	0.789084	0.40175	-0.242106	0.164284	0.201834	0.34952	0.103314	0.48011	0.657461	1.07668	3.15348	-0.105993	0.0756758	-0.232275	-0.304464	0.347779	0.219333	0.232622	-0.0860526	-1.88216	-0.17393	-0.769262	-0.0440803	-0.571745	0.185434	0.416473	0.50794	0.281761	0.349732	0.0863202	-2.44768	-0.499623	0.100002	-0.262129	-0.916901	5.53318	1.36572	-0.730099	-0.634351	0.202015	0.132788	0.0668958
76	0.188429	0.322574	0.686596	0.397561	1.16041	0.309731	1.1499	0.861025	0.482637	-0.299359	0.054198	0.17843	0.316351	0.108807	0.523547	0.480281	0.959139	3.01866	-0.113929	0.167781	-0.291366	-0.336297	0.28686	0.192704	0.304843	-0.0726637	-1.80046	-0.171784	-0.783821	-0.0895418	-0.469634	0.10795	0.358581	0.406066	0.311099	0.322733	0.103643	-2.66875	-0.540223	0.101841	-0.291222	-0.887779	6.75807	0.257459	-0.695721	-0.61957	0.0929691	0.107389	0.0534085
78	0.277417	0.824217	0.9423	0.295095	1.28983	0.603511	0.497576	0.75188	0.548382	-0.325683	-0.0613365	0.18411	0.252056	0.133252	0.570391	0.284324	0.878817	2.82459	-0.0956606	0.270869	-0.313281	-0.365745	0.210404	0.140189	0.362826	-0.0443348	-1.72781	-0.151896	-0.760103	-0.119766	-0.361291	0.0498585	0.298475	0.254326	0.335583	0.303362	0.125222	-2.87577	-0.567889	0.117007	-0.291849	-0.832629	7.70404	-0.711434	-0.649288	-0.566506	-0.030069	0.0756584	0.0384318
80	0.349393	1.23952	1.09617	0.176231	1.36385	0.926617	-0.0946154	0.495623	0.584755	-0.302977	-0.170448	0.219064	0.165868	0.173992	0.621579	0.0635569	0.846937	2.5694	-0.0531056	0.378648	-0.302724	-0.383912	0.126347	0.0616384	0.404035	-0.00884988	-1.66631	-0.114901	-0.713048	-0.134687	-0.262625	0.0163806	0.242916	0.0702968	0.353409	0.28896	0.152522	-3.06852	-0.580259	0.139434	-0.269173	-0.754265	8.281	-1.51231	-0.58071	-0.480163	-0.159841	0.0410348	0.0185475
82	0.399029	1.50855	1.15589	0.0686551	1.3749	1.25399	-0.643324	0.150495	0.591963	-0.220473	-0.261225	0.277541	0.0694213	0.227321	0.67429	-0.192861	0.86023	2.26645	0.00614184	0.481469	-0.2697	-0.382026	0.0392366	-0.0371016	0.42784	0.0272483	-1.61843	-0.0638236	-0.653655	-0.136642	-0.186023	0.00840723	0.199688	-0.120032	0.363491	0.27675	0.185257	-3.23779	-0.577037	0.165054	-0.23109	-0.64828	8.43162	-2.14102	-0.483409	-0.373407	-0.291282	0.00704472	-0.00869849
84	0.423691	1.61121	1.14571	-0.00419621	1.33285	1.55321	-1.16063	-0.225618	0.58729	-0.0784488	-0.324858	0.351009	-0.026993	0.28841	0.721095	-0.493621	0.903759	1.94377	0.0704271	0.567674	-0.225832	-0.353982	-0.0519548	-0.143796	0.434767	0.0598701	-1.58675	-0.00439097	-0.586798	-0.129521	-0.137868	0.0215954	0.176882	-0.286971	0.365123	0.264889	0.221482	-3.36882	-0.559722	0.193102	-0.186122	-0.505049	8.14124	-2.61173	-0.3573	-0.264141	-0.422253	-0.0233515	-0.0439802
86	0.424207	1.57158	1.10103	-0.0296479	1.2617	1.79125	-1.64477	-0.591418	0.600942	0.111192	-0.358024	0.431291	-0.117306	0.350904	0.751565	-0.837091	0.95683	1.63559	0.126808	0.625454	-0.181235	-0.298714	-0.153097	-0.241502	0.425462	0.0874403	-1.57242	0.0557545	-0.512657	-0.117312	-0.116996	0.0479187	0.181211	-0.403424	0.357654	0.253068	0.258193	-3.44635	-0.530811	0.225346	-0.141808	-0.314449	7.44071	-2.94932	-0.209649	-0.170293	-0.552734	-0.0480779	-0.0858483
88	0.406262	1.44766	1.06036	-0.00975843	1.19044	1.94197	-2.07864	-0.924205	0.666568	0.327626	-0.363354	0.512182	-0.200403	0.406998	0.755675	-1.20607	0.999953	1.36893	0.164202	0.644834	-0.142745	-0.221602	-0.271585	-0.312281	0.399819	0.109951	-1.57322	0.108755	-0.430612	-0.10259	-0.114854	0.0788161	0.215752	-0.451011	0.340551	0.242355	0.292274	-3.46005	-0.49279	0.263374	-0.103956	-0.0716581	6.40113	-3.18229	-0.0535068	-0.104765	-0.682649	-0.066003	-0.130991
90	0.381151	1.31067	1.0568	0.0386029	1.14122	1.99199	-2.43418	-1.21039	0.809889	0.546153	-0.347731	0.588989	-0.278392	0.448552	0.727446	-1.56838	1.02036	1.15246	0.175961	0.619466	-0.113573	-0.134193	-0.412016	-0.342024	0.356828	0.127603	-1.58238	0.148505	-0.343067	-0.0856825	-0.117788	0.108208	0.277881	-0.42431	0.313875	0.234371	0.321386	-3.40911	-0.447343	0.305116	-0.076627	0.217969	5.12205	-3.33749	0.095748	-0.0725226	-0.8092	-0.0768971	-0.175061
92	0.364314	1.22204	1.11104	0.0881375	1.11977	1.943	-2.67868	-1.43267	1.03952	0.743854	-0.319239	0.656746	-0.353378	0.469005	0.667218	-1.88359	1.01435	0.974195	0.161116	0.548046	-0.0938947	-0.0519569	-0.572823	-0.324888	0.295495	0.13978	-1.58921	0.17211	-0.256864	-0.0649066	-0.111199	0.133841	0.358304	-0.332158	0.27881	0.230354	0.34431	-3.3046	-0.395125	0.342567	-0.062332	0.53648	3.71572	-3.43712	0.224601	-0.0707143	-0.925175	-0.0813843	-0.213831
94	0.371045	1.21633	1.22759	0.109185	1.11181	1.81019	-2.77983	-1.56201	1.34289	0.903951	-0.284226	0.708613	-0.42453	0.465194	0.581774	-2.11368	0.986258	0.810297	0.124031	0.435243	-0.0817417	0.00955109	-0.74539	-0.26581	0.2166	0.144852	-1.58157	0.180338	-0.18153	-0.037864	-0.0845053	0.156527	0.441936	-0.195874	0.237687	0.230698	0.360505	-3.16836	-0.336201	0.362512	-0.0620576	0.854148	2.29085	-3.4979	0.32493	-0.0911089	-1.0195	-0.0808636	-0.244259
96	0.410577	1.2948	1.39437	0.0791909	1.08762	1.61786	-2.70944	-1.55904	1.68802	1.01755	-0.245763	0.735873	-0.487186	0.438089	0.482527	-2.23346	0.945418	0.640576	0.0728136	0.291926	-0.0737726	0.0390135	-0.916	-0.180108	0.124429	0.140847	-1.54931	0.176976	-0.125524	-0.00319259	-0.0351534	0.178116	0.510804	-0.0449203	0.193283	0.235216	0.369138	-3.02764	-0.270928	0.350702	-0.0750794	1.13352	0.939207	-3.53155	0.395648	-0.12322	-1.08031	-0.0772793	-0.26505
98	0.481315	1.42984	1.58521	-0.00960733	1.01296	1.39391	-2.44783	-1.38395	2.02999	1.0827	-0.203941	0.729901	-0.534644	0.392163	0.382561	-2.23702	0.90276	0.462169	0.0171786	0.134303	-0.0658312	0.0327395	-1.06975	-0.0900762	0.0274676	0.126538	-1.4873	0.167364	-0.0927216	0.0380073	0.0301818	0.199643	0.5483	0.0892783	0.147669	0.243745	0.368299	-2.9064	-0.200844	0.297989	-0.098916	1.33603	-0.273009	-3.54614	0.441881	-0.156747	-1.09948	-0.0726383	-0.276514
100	0.570102	1.57665	1.76444	-0.147039	0.862322	1.16494	-1.99084	-1.01073	2.31988	1.10191	-0.157563	0.685255	-0.561863	0.333897	0.293335	-2.13736	0.868123	0.293535	-0.0335224	-0.0182842	-0.0534742	-0.00411185	-1.19477	-0.0194022	-0.062602	0.102349	-1.39653	0.156538	-0.0809671	0.0817072	0.0982148	0.220713	0.543342	0.180416	0.101308	0.256467	0.355176	-2.81592	-0.12908	0.205506	-0.129781	1.42993	-1.30799	-3.54736	0.472046	-0.183014	-1.07626	-0.0683193	-0.279882
102	0.656719	1.68758	1.89293	-0.3075	0.629235	0.952594	-1.35847	-0.439733	2.5145	1.07963	-0.10619	0.602298	-0.56918	0.270334	0.22167	-1.95958	0.848193	0.166264	-0.0717484	-0.146744	-0.032703	-0.0589789	-1.28494	0.0130331	-0.133427	0.0705515	-1.28256	0.147436	-0.0831392	0.121625	0.154806	0.240146	0.492867	0.213971	0.0530548	0.273487	0.327381	-2.74859	-0.0599836	0.0860783	-0.163555	1.39764	-2.15395	-3.53961	0.494072	-0.195929	-1.01799	-0.0644296	-0.27652
104	0.721988	1.72505	1.93519	-0.457078	0.329662	0.771549	-0.60062	0.296184	2.58479	1.02095	-0.0515791	0.487904	-0.564016	0.208301	0.167752	-1.73034	0.844676	0.108981	-0.0927483	-0.235951	-0.000972796	-0.115586	-1.34035	-0.00186027	-0.17514	0.0346279	-1.15173	0.139623	-0.0897061	0.150746	0.191426	0.257	0.40172	0.19158	0.00125272	0.293888	0.284867	-2.67809	0.00200115	-0.0392246	-0.196871	1.2402	-2.81918	-3.52666	0.512354	-0.19294	-0.9373	-0.0595795	-0.267513
106	0.755624	1.6704	1.86686	-0.562792	-0.00230751	0.628999	0.205055	1.13404	2.52167	0.931318	0.00211139	0.353823	-0.559416	0.154222	0.124993	-1.46816	0.853061	0.131964	-0.0952895	-0.277573	0.041734	-0.15867	-1.36548	-0.0611384	-0.182959	-0.00188174	-1.00698	0.128977	-0.0912272	0.1631	0.209232	0.270943	0.280255	0.131273	-0.0545244	0.314978	0.231299	-2.56683	0.0538623	-0.148024	-0.227732	0.977313	-3.32459	-3.51199	0.526704	-0.175757	-0.846913	-0.0513405	-0.253796
108	0.759775	1.52687	1.68112	-0.601197	-0.32401	0.525433	0.965543	1.99037	2.33742	0.816799	0.0493346	0.21342	-0.569675	0.113975	0.0824047	-1.1783	0.863203	0.220657	-0.0821583	-0.271062	0.0922045	-0.178204	-1.36662	-0.150996	-0.158298	-0.0364807	-0.845587	0.108679	-0.0798267	0.155204	0.218666	0.281634	0.141038	0.062717	-0.111957	0.332482	0.173855	-2.37837	0.0953534	-0.223893	-0.255328	0.642519	-3.69678	-3.49892	0.533628	-0.150063	-0.754801	-0.0373131	-0.236651
110	0.746294	1.31619	1.39238	-0.564256	-0.594706	0.456112	1.59166	2.77466	2.06196	0.683861	0.0849559	0.0783072	-0.604716	0.0922766	0.0292647	-0.854113	0.862846	0.341444	-0.0600922	-0.222628	0.144114	-0.17179	-1.34969	-0.250898	-0.108103	-0.0682058	-0.660536	0.0714687	-0.0497618	0.126759	0.234809	0.287743	-0.00373279	0.0184539	-0.16554	0.341861	0.121247	-2.09035	0.129521	-0.260684	-0.279149	0.275303	-3.9628	-3.49033	0.52922	-0.123625	-0.662127	-0.0163454	-0.218106
112	0.729133	1.06932	1.03549	-0.461355	-0.783289	0.412654	2.01683	3.40305	1.73473	0.53861	0.106122	-0.0436752	-0.665535	0.0915702	-0.0394684	-0.483735	0.843491	0.456517	-0.0386428	-0.142904	0.189168	-0.14455	-1.31935	-0.339234	-0.0427949	-0.0972869	-0.44552	0.0126447	0.00207894	0.0805029	0.270815	0.286645	-0.143252	0.0238509	-0.207582	0.340197	0.0807316	-1.70324	0.162025	-0.262286	-0.297897	-0.0872549	-4.14698	-3.48828	0.512223	-0.103194	-0.564882	0.0107295	-0.200797
114	0.715768	0.814276	0.660194	-0.317085	-0.871812	0.384334	2.20857	3.80992	1.39453	0.385921	0.113496	-0.148461	-0.742645	0.110875	-0.119368	-0.0588205	0.805805	0.539771	-0.0277708	-0.0443807	0.21904	-0.106737	-1.2792	-0.398627	0.0263355	-0.12421	-0.201468	-0.0672601	0.0751434	0.0213869	0.332476	0.275408	-0.26796	0.0892159	-0.230365	0.327565	0.0555448	-1.24191	0.19931	-0.238521	-0.308782	-0.416633	-4.26958	-3.49348	0.485783	-0.091466	-0.458099	0.041256	-0.187218
116	0.702078	0.565392	0.321676	-0.165145	-0.855819	0.359355	2.16989	3.95669	1.0706	0.22913	0.111394	-0.234193	-0.81825	0.145269	-0.196577	0.418143	0.760939	0.585004	-0.0346711	0.0604804	0.227517	-0.0700791	-1.23218	-0.419366	0.0894326	-0.148741	0.0587191	-0.161252	0.163984	-0.0445826	0.415995	0.252669	-0.369331	0.206787	-0.228644	0.306994	0.0440321	-0.749893	0.246235	-0.199631	-0.307585	-0.69552	-4.34645	-3.50502	0.457016	-0.0856381	-0.340282	0.071747	-0.178646
118	0.673291	0.318774	0.0694944	-0.0396625	-0.743424	0.326678	1.93341	3.83705	0.777598	0.0705242	0.106681	-0.299339	-0.871312	0.186422	-0.252352	0.930471	0.725794	0.601657	-0.0609936	0.160135	0.212141	-0.0441888	-1.18043	-0.400302	0.139536	-0.169473	0.310102	-0.256833	0.258002	-0.111466	0.509232	0.220167	-0.440478	0.353441	-0.201592	0.2828	0.0409237	-0.278549	0.304117	-0.152102	-0.289583	-0.917222	-4.38919	-3.52045	0.434559	-0.078401	-0.215757	0.0991538	-0.174335
120	0.610685	0.0561731	-0.0622688	0.0337618	-0.55432	0.278666	1.55337	3.47737	0.515654	-0.0878549	0.106702	-0.341768	-0.883599	0.224189	-0.270629	1.4485	0.713854	0.600313	-0.101767	0.244145	0.174812	-0.0342218	-1.1245	-0.347546	0.173143	-0.18419	0.521084	-0.339028	0.343261	-0.174178	0.595326	0.18279	-0.477449	0.497837	-0.153507	0.258062	0.0401074	0.125366	0.370036	-0.0975059	-0.251081	-1.08302	-4.40555	-3.53638	0.425198	-0.0610505	-0.0939788	0.12172	-0.171482
122	0.501067	-0.244317	-0.0612971	0.0444328	-0.318408	0.213832	1.09902	2.93076	0.274928	-0.243849	0.116809	-0.359377	-0.844607	0.248806	-0.245404	1.93443	0.726281	0.576483	-0.146735	0.3033	0.121235	-0.0402872	-1.06268	-0.271965	0.190119	-0.190859	0.662366	-0.394518	0.406366	-0.228818	0.657162	0.146854	-0.480283	0.609226	-0.0930827	0.23261	0.0375146	0.430057	0.437635	-0.0342735	-0.191105	-1.19881	-4.39999	-3.54928	0.431166	-0.02738	0.0136481	0.139005	-0.166099
124	0.344827	-0.595856	0.0615501	-0.00183859	-0.0728103	0.138203	0.64875	2.26486	0.0426021	-0.395666	0.138297	-0.351815	-0.753975	0.253046	-0.184457	2.34907	0.748401	0.503219	-0.183706	0.330283	0.059489	-0.0584015	-0.99124	-0.186523	0.19324	-0.188716	0.715806	-0.415466	0.438849	-0.272597	0.681527	0.117466	-0.452801	0.664903	-0.0315099	0.202725	0.0327199	0.624447	0.498922	0.0390058	-0.112657	-1.27193	-4.37454	-3.55629	0.449419	0.0233184	0.0977947	0.151171	-0.154474
126	0.158972	-0.994712	0.275602	-0.0863903	0.143624	0.0640085	0.281487	1.54643	-0.190183	-0.542759	0.167581	-0.322093	-0.621102	0.233697	-0.107414	2.65862	0.753936	0.339066	-0.202573	0.321096	-0.00179407	-0.0822926	-0.906184	-0.104139	0.187399	-0.178782	0.67952	-0.401729	0.439756	-0.303567	0.662216	0.0962943	-0.401006	0.654248	0.0200363	0.162942	0.0285678	0.718233	0.546121	0.120673	-0.0229245	-1.30855	-4.33004	-3.55547	0.473283	0.0853266	0.154387	0.15807	-0.134577
128	-0.0262721	-1.41983	0.537213	-0.185021	0.297813	0.00562227	0.0625141	0.828177	-0.423793	-0.686068	0.197138	-0.276875	-0.462596	0.19197	-0.0387255	2.8402	0.715048	0.0494354	-0.198312	0.276828	-0.0551118	-0.105302	-0.805899	-0.0362475	0.178379	-0.163393	0.567398	-0.360785	0.414747	-0.320383	0.601582	0.0807843	-0.331009	0.578955	0.0528385	0.109147	0.0291664	0.736729	0.572847	0.204864	0.0678372	-1.31183	-4.26762	-3.54555	0.49569	0.147815	0.185836	0.15873	-0.106806
130	-0.176066	-1.83936	0.798133	-0.276006	0.369919	-0.0258529	0.025671	0.14313	-0.649389	-0.826817	0.21811	-0.224951	-0.298646	0.13285	0.00156525	2.88523	0.613144	-0.368798	-0.171862	0.204821	-0.095282	-0.121892	-0.693659	0.00809251	0.171202	-0.144865	0.403792	-0.305528	0.371969	-0.322281	0.510076	0.0649623	-0.247868	0.450555	0.0623693	0.0414033	0.0373695	0.712416	0.574507	0.282519	0.148551	-1.28113	-4.19009	-3.52515	0.5124	0.19762	0.200087	0.151544	-0.0737857
132	-0.261457	-2.2198	1.01354	-0.345873	0.358105	-0.0272621	0.158973	-0.491546	-0.852224	-0.964016	0.223705	-0.174383	-0.149296	0.0637675	0.00549964	2.8003	0.445374	-0.873089	-0.1288	0.11821	-0.11995	-0.128575	-0.578623	0.0227868	0.168454	-0.123993	0.216077	-0.25077	0.316958	-0.309289	0.403673	0.0412929	-0.156108	0.28696	0.0488809	-0.0350217	0.0530147	0.675939	0.548398	0.343903	0.209902	-1.21248	-4.10279	-3.49184	0.523647	0.222368	0.207928	0.135052	-0.0393452
134	-0.267892	-2.53252	1.14838	-0.391223	0.27846	-0.00555724	0.402483	-1.06355	-1.01766	-1.09183	0.212017	-0.129604	-0.0312442	-0.00683	-0.0194912	2.60533	0.224565	-1.38116	-0.076737	0.0333826	-0.129397	-0.124288	-0.47451	0.00519852	0.169281	-0.0993421	0.0283078	-0.209651	0.249629	-0.282555	0.299633	0.00281788	-0.061487	0.109391	0.0167367	-0.111043	0.0726778	0.649405	0.49409	0.38146	0.246244	-1.10069	-4.01351	-3.44156	0.533533	0.213146	0.219451	0.108866	-0.00716952
136	-0.198905	-2.75495	1.18153	-0.416683	0.159788	0.0233489	0.663424	-1.55274	-1.13751	-1.19832	0.186976	-0.0899123	0.0446822	-0.070568	-0.0525272	2.32932	-0.0260428	-1.79748	-0.0227544	-0.0341739	-0.125772	-0.110245	-0.396082	-0.0433866	0.169675	-0.06796	-0.141997	-0.191024	0.165233	-0.244569	0.211752	-0.054979	0.0275258	-0.0599677	-0.0272464	-0.176958	0.0908942	0.643802	0.414188	0.391809	0.256102	-0.942914	-3.9314	-3.36861	0.547733	0.16652	0.24072	0.0743105	0.0203111
138	-0.074013	-2.86718	1.1075	-0.430524	0.0350484	0.038799	0.845347	-1.92276	-1.21387	-1.26649	0.156914	-0.0501961	0.075326	-0.119861	-0.0654643	2.0044	-0.279841	-2.05051	0.0280511	-0.0742732	-0.11202	-0.0893481	-0.354576	-0.117434	0.164109	-0.027307	-0.283739	-0.198405	0.0588119	-0.199078	0.146565	-0.132857	0.100093	-0.200101	-0.0758535	-0.225927	0.102152	0.6606	0.314988	0.376199	0.241259	-0.742875	-3.86518	-3.2666	0.570947	0.0859238	0.271728	0.0345211	0.0423615
140	0.0781663	-2.84823	0.935957	-0.439981	-0.067262	0.0216195	0.8803	-2.12101	-1.25855	-1.27765	0.131285	-0.00371819	0.0660786	-0.148565	-0.031312	1.65976	-0.512745	-2.12449	0.0726023	-0.0850976	-0.0908922	-0.065326	-0.353756	-0.207253	0.147888	0.0226333	-0.390183	-0.230405	-0.0694556	-0.150624	0.101801	-0.227199	0.145695	-0.293699	-0.123202	-0.256114	0.102757	0.695671	0.206262	0.33944	0.205169	-0.514156	-3.82108	-3.13008	0.605518	-0.0178296	0.306356	-0.00596375	0.0596252
142	0.229297	-2.67628	0.688795	-0.447907	-0.128535	-0.0393876	0.750028	-2.08859	-1.28821	-1.21624	0.116951	0.0542502	0.0302896	-0.152888	0.0673521	1.31715	-0.707051	-2.07093	0.108921	-0.073748	-0.0644182	-0.0418445	-0.388169	-0.299799	0.119148	0.0783627	-0.456703	-0.282075	-0.21118	-0.103812	0.0677447	-0.33022	0.158144	-0.330121	-0.165582	-0.27061	0.0919076	0.742783	0.0997768	0.287976	0.151635	-0.280742	-3.80146	-2.95646	0.651742	-0.127608	0.334437	-0.0419618	0.0733271
144	0.360273	-2.33499	0.395139	-0.451423	-0.140729	-0.142894	0.486822	-1.77865	-1.31723	-1.07472	0.115618	0.123642	-0.0133292	-0.132514	0.232129	0.989157	-0.853944	-1.99285	0.13515	-0.0539895	-0.0340349	-0.0218536	-0.444321	-0.380281	0.0796256	0.133696	-0.479408	-0.346457	-0.35075	-0.062566	0.0312037	-0.431103	0.138933	-0.307976	-0.201251	-0.275373	0.0717605	0.794816	0.00683964	0.228038	0.0843821	-0.0735659	-3.80426	-2.74769	0.709283	-0.2232	0.345213	-0.0685678	0.0844911
146	0.466828	-1.82411	0.0847909	-0.442425	-0.103303	-0.27441	0.15424	-1.17891	-1.35196	-0.857225	0.123482	0.199007	-0.0452092	-0.091386	0.446637	0.680437	-0.955185	-2.00675	0.149286	-0.0418356	-0.00122304	-0.00724755	-0.504438	-0.434318	0.0339623	0.181976	-0.454647	-0.415872	-0.469949	-0.0296667	-0.0190528	-0.517944	0.0980373	-0.236133	-0.229528	-0.276372	0.0466591	0.843038	-0.0642104	0.164624	0.00746408	0.0766044	-3.82353	-2.51105	0.778393	-0.286507	0.330961	-0.0820737	0.0936263
148	0.559564	-1.16936	-0.218143	-0.409501	-0.0193361	-0.410252	-0.182343	-0.331263	-1.3888	-0.580659	0.133101	0.271401	-0.0501932	-0.0374544	0.679622	0.390793	-1.02321	-2.19745	0.149789	-0.0502873	0.0318174	0.00124845	-0.551468	-0.450197	-0.0119364	0.218364	-0.378949	-0.482875	-0.553881	-0.00672509	-0.0871913	-0.580163	0.05146	-0.132357	-0.249833	-0.277346	0.0219125	0.876847	-0.109547	0.101486	-0.0741458	0.147745	-3.85074	-2.25878	0.859834	-0.307202	0.289498	-0.0807292	0.101032
150	0.65782	-0.426267	-0.499301	-0.340946	0.106199	-0.524803	-0.481037	0.660062	-1.41689	-0.272528	0.136586	0.331738	-0.0216764	0.0189545	0.892887	0.118592	-1.07814	-2.58452	0.136561	-0.0848067	0.0620056	0.00406811	-0.573639	-0.420794	-0.0525687	0.240885	-0.249289	-0.541042	-0.595483	0.00546494	-0.167397	-0.610796	0.0163297	-0.0197451	-0.261273	-0.279137	0.00253129	0.886463	-0.129909	0.0417398	-0.154462	0.133239	-3.87633	-2.00653	0.95322	-0.286558	0.224754	-0.0651842	0.107468
152	0.779185	0.325478	-0.754022	-0.228542	0.264977	-0.598112	-0.73319	1.63862	-1.42362	0.0344107	0.128741	0.373864	0.0370259	0.0677403	1.05156	-0.136871	-1.14124	-3.11392	0.111481	-0.140951	0.0860317	0.00262484	-0.567123	-0.34495	-0.0837742	0.249813	-0.0642552	-0.585687	-0.596819	0.00648142	-0.244433	-0.608058	0.00538354	0.0779482	-0.262967	-0.280627	-0.00775924	0.868784	-0.12933	-0.0115489	-0.227217	0.0436948	-3.89105	-1.77081	1.05461	-0.237488	0.145277	-0.0384987	0.114672
154	0.928842	0.997117	-0.983142	-0.0714225	0.442319	-0.620658	-0.954405	2.42592	-1.39984	0.3093	0.108928	0.395879	0.114488	0.101625	1.133	-0.374662	-1.22675	-3.67665	0.0779777	-0.205045	0.101637	-0.00120623	-0.536118	-0.228191	-0.102764	0.246132	0.173312	-0.614342	-0.567013	-0.00392567	-0.297817	-0.57571	0.0228285	0.140708	-0.254792	-0.280539	-0.00704382	0.833457	-0.113273	-0.055224	-0.287151	-0.0969979	-3.88682	-1.56614	1.15473	-0.180304	0.061264	-0.00571514	0.125263
156	1.09375	1.51109	-1.18672	0.121364	0.615755	-0.593686	-1.16263	2.8649	-1.34254	0.529922	0.0809954	0.399402	0.195089	0.117745	1.13127	-0.592972	-1.33576	-4.1446	0.0398215	-0.257919	0.108895	-0.00598609	-0.490581	-0.0826083	-0.107653	0.230418	0.452556	-0.62672	-0.51814	-0.0256003	-0.308494	-0.522089	0.0629432	0.155454	-0.237983	-0.278989	0.00475376	0.80461	-0.086963	-0.0863342	-0.331199	-0.259586	-3.85721	-1.40259	1.23915	-0.135611	-0.0187852	0.026919	0.141925
158	1.24496	1.81967	-1.35908	0.331192	0.757505	-0.525803	-1.35454	2.86297	-1.25448	0.686712	0.0514651	0.387723	0.263248	0.117768	1.05632	-0.790432	-1.45539	-4.4076	-0.000104965	-0.280738	0.110737	-0.0116727	-0.442551	0.0743769	-0.0971596	0.203033	0.751358	-0.623999	-0.460966	-0.0574065	-0.265861	-0.458032	0.111789	0.117848	-0.215175	-0.277939	0.0262217	0.815359	-0.0544226	-0.10254	-0.358917	-0.417788	-3.79747	-1.28443	1.29085	-0.117135	-0.0905126	0.0529623	0.166244
160	1.34741	1.9149	-1.48821	0.533933	0.840728	-0.428348	-1.49153	2.41883	-1.14172	0.782754	0.0267348	0.364331	0.306635	0.106787	0.929307	-0.966768	-1.56425	-4.39759	-0.0402363	-0.261155	0.112241	-0.0200355	-0.402312	0.222561	-0.0708624	0.165454	1.0359	-0.607622	-0.402136	-0.0966499	-0.172779	-0.394283	0.151437	0.0330187	-0.18989	-0.280365	0.0549722	0.896293	-0.0183116	-0.102336	-0.371878	-0.553551	-3.70461	-1.21064	1.2946	-0.127315	-0.154183	0.0669335	0.197845
162	1.37279	1.82548	-1.56001	0.706826	0.846903	-0.312119	-1.50228	1.62221	-1.01083	0.830099	0.0104407	0.332759	0.318023	0.0916098	0.776691	-1.12179	-1.64165	-4.09439	-0.0796872	-0.197726	0.118799	-0.0340185	-0.375507	0.342546	-0.0299425	0.121637	1.26463	-0.578153	-0.343443	-0.138875	-0.0467117	-0.339099	0.165383	-0.0846731	-0.165848	-0.28866	0.0880842	1.06297	0.0196328	-0.0850686	-0.372316	-0.657689	-3.57721	-1.17691	1.24177	-0.15727	-0.212872	0.0655095	0.234356
164	1.3091	1.60185	-1.56567	0.835505	0.770795	-0.1866	-1.30237	0.626594	-0.866618	0.844265	0.00197606	0.297461	0.296224	0.0789643	0.625031	-1.2526	-1.67659	-3.51642	-0.117021	-0.100992	0.133825	-0.0560974	-0.361933	0.419551	0.0221277	0.0781331	1.39632	-0.534753	-0.282906	-0.178255	0.0836555	-0.296707	0.143467	-0.213159	-0.14649	-0.303123	0.12235	1.30842	0.0578632	-0.0509588	-0.361778	-0.726939	-3.4151	-1.17856	1.13373	-0.190827	-0.269024	0.0485609	0.272278
166	1.16282	1.29619	-1.50812	0.917901	0.620784	-0.060821	-0.824921	-0.394265	-0.710633	0.839293	-0.00328243	0.264532	0.246371	0.0738638	0.497037	-1.35026	-1.67255	-2.70535	-0.149339	0.00923856	0.157002	-0.0863444	-0.356242	0.446387	0.0795	0.0425005	1.40034	-0.475571	-0.216785	-0.208517	0.185428	-0.267009	0.0846599	-0.326011	-0.134807	-0.321236	0.154362	1.60397	0.094328	-0.00134711	-0.340581	-0.760212	-3.21873	-1.21268	0.982607	-0.210742	-0.320965	0.0196617	0.308286
168	0.953585	0.946258	-1.40437	0.963094	0.414952	0.0560596	-0.052389	-1.28983	-0.540501	0.825063	-0.0121205	0.241084	0.179186	0.0781754	0.40852	-1.39789	-1.64603	-1.71296	-0.172443	0.109467	0.183891	-0.121238	-0.350289	0.424788	0.134707	0.0206634	1.26565	-0.398981	-0.141738	-0.224117	0.229944	-0.246502	-0.00323261	-0.397634	-0.133214	-0.337977	0.180594	1.90745	0.126137	0.0608743	-0.308487	-0.756717	-2.98828	-1.27869	0.808868	-0.204603	-0.361178	-0.0143269	0.340232
170	0.705255	0.569754	-1.28178	0.985651	0.175604	0.155823	0.962116	-1.96185	-0.350605	0.807132	-0.0306461	0.233101	0.10856	0.0896122	0.365935	-1.3722	-1.61986	-0.595265	-0.182214	0.178956	0.207116	-0.153983	-0.336421	0.364952	0.180033	0.0146207	1.00567	-0.305233	-0.056658	-0.221332	0.199876	-0.230034	-0.106799	-0.40923	-0.14311	-0.346938	0.197614	2.17432	0.149815	0.130902	-0.266273	-0.717019	-2.72303	-1.37674	0.636262	-0.168438	-0.377543	-0.0448023	0.367316
172	0.438367	0.169698	-1.16927	0.998371	-0.0745969	0.233456	2.09284	-2.37239	-0.134883	0.78802	-0.0614237	0.242822	0.0472921	0.101571	0.364826	-1.24886	-1.61414	0.586499	-0.176633	0.204831	0.218641	-0.1764	-0.310592	0.283749	0.208961	0.0217549	0.657176	-0.19799	0.0358357	-0.198955	0.0927894	-0.212715	-0.211851	-0.35369	-0.16408	-0.341879	0.202462	2.36721	0.162145	0.202065	-0.217229	-0.645894	-2.42158	-1.50518	0.485851	-0.107182	-0.357342	-0.0638518	0.389448
174	0.166814	-0.254826	-1.0866	1.00692	-0.313256	0.288683	3.1621	-2.53251	0.10824	0.768449	-0.10154	0.267273	0.00202409	0.104198	0.390049	-1.01033	-1.63844	1.76154	-0.15747	0.184263	0.212122	-0.181672	-0.274092	0.20226	0.217166	0.0360843	0.273494	-0.0851732	0.128181	-0.158448	-0.0795837	-0.191312	-0.307879	-0.237677	-0.193118	-0.318442	0.193051	2.461	0.161207	0.266471	-0.167489	-0.554644	-2.08322	-1.65829	0.371083	-0.0323117	-0.29248	-0.0668528	0.406356
176	-0.101538	-0.700512	-1.03568	1.00846	-0.516626	0.32487	3.97942	-2.47866	0.37013	0.747566	-0.142262	0.299073	-0.0306607	0.0866507	0.418447	-0.653287	-1.68847	2.84681	-0.130716	0.123457	0.184368	-0.16688	-0.233077	0.143127	0.20276	0.0507269	-0.0858979	0.0212352	0.207101	-0.103535	-0.295344	-0.164707	-0.390407	-0.0803991	-0.224533	-0.275915	0.168469	2.44383	0.147012	0.316172	-0.124644	-0.46081	-1.70994	-1.82585	0.295485	0.0422973	-0.183643	-0.0542721	0.41711
178	-0.362706	-1.15944	-0.997419	0.99392	-0.658628	0.345229	4.38747	-2.24543	0.627987	0.722197	-0.170468	0.329403	-0.0650748	0.0399652	0.423867	-0.192711	-1.74827	3.74959	-0.105341	0.0343474	0.135469	-0.134349	-0.195991	0.127919	0.165817	0.0602808	-0.366309	0.106616	0.253751	-0.039319	-0.527682	-0.133421	-0.460619	0.0899764	-0.250981	-0.218838	0.129101	2.31587	0.121185	0.344556	-0.0950617	-0.384802	-1.30826	-1.99478	0.253518	0.105002	-0.0415602	-0.0318828	0.420407
180	-0.615047	-1.62577	-0.93571	0.951725	-0.713229	0.348471	4.30021	-1.84273	0.845182	0.685958	-0.171501	0.351787	-0.123404	-0.0403963	0.383369	0.339145	-1.79698	4.37694	-0.0906352	-0.0694199	0.0678949	-0.0913079	-0.170009	0.174528	0.107504	0.0620658	-0.526494	0.156136	0.245342	0.0288203	-0.749517	-0.0985794	-0.522897	0.240625	-0.26554	-0.157936	0.0766152	2.08792	0.0857201	0.347529	-0.0812085	-0.344769	-0.889503	-2.15211	0.233878	0.150238	0.115203	-0.00918278	0.415372
182	-0.858784	-2.10389	-0.807274	0.870895	-0.660645	0.326925	3.72027	-1.24429	0.977117	0.629191	-0.132715	0.364884	-0.229634	-0.153159	0.282816	0.898831	-1.81734	4.65019	-0.0930936	-0.175753	-0.0147005	-0.0480192	-0.158135	0.294774	0.0292372	0.0559729	-0.543541	0.157649	0.158546	0.0962779	-0.936704	-0.0608883	-0.581723	0.338008	-0.264093	-0.10958	0.0138758	1.78045	0.0414226	0.324172	-0.0804186	-0.351941	-0.468127	-2.28803	0.223768	0.180499	0.265007	0.00348253	0.402266
184	-1.09565	-2.6114	-0.574257	0.742724	-0.494989	0.268874	2.73102	-0.392485	0.981776	0.54028	-0.0467584	0.372978	-0.402464	-0.291403	0.120114	1.44095	-1.80251	4.52109	-0.114083	-0.275816	-0.108264	-0.0150005	-0.158264	0.492502	-0.0676856	0.0434461	-0.414077	0.104338	-0.0256825	0.159915	-1.07014	-0.0201058	-0.63942	0.351568	-0.246942	-0.0931928	-0.0552315	1.4226	-0.0129811	0.276766	-0.0858468	-0.408269	-0.0587365	-2.39774	0.212587	0.205724	0.388633	-0.0019353	0.382621
186	-1.32774	-3.17351	-0.215344	0.561796	-0.229386	0.164222	1.46794	0.77984	0.832002	0.408307	0.0862622	0.383995	-0.649562	-0.444145	-0.0948199	1.92759	-1.75856	3.98478	-0.149323	-0.364207	-0.208504	-0.000257762	-0.164478	0.762583	-0.181782	0.0264051	-0.15279	-0.00360893	-0.316847	0.218224	-1.13752	0.024788	-0.695492	0.257946	-0.218865	-0.126723	-0.126137	1.04987	-0.0803881	0.210292	-0.0891903	-0.506938	0.326933	-2.4816	0.194045	0.240073	0.473612	-0.0288938	0.358726
188	-1.55559	-3.81106	0.267924	0.32738	0.104696	0.0104878	0.0814965	2.31636	0.525305	0.226454	0.258372	0.406026	-0.964904	-0.598761	-0.343095	2.33502	-1.7016	3.08545	-0.19044	-0.438211	-0.310735	-0.00737856	-0.16974	1.09113	-0.310552	0.00664561	0.210814	-0.158719	-0.710712	0.270977	-1.1349	0.0748523	-0.747434	0.0459146	-0.187482	-0.221373	-0.194144	0.699686	-0.16358	0.131613	-0.0838544	-0.635035	0.681625	-2.54377	0.166499	0.297007	0.516182	-0.0755641	0.332847
190	-1.7767	-4.52774	0.851074	0.0452885	0.464412	-0.184131	-1.29506	4.20546	0.0872455	-0.00485778	0.455223	0.443979	-1.3298	-0.743536	-0.601683	2.65576	-1.6512	1.91211	-0.227947	-0.496875	-0.409879	-0.0350155	-0.168619	1.45713	-0.449619	-0.0142509	0.63709	-0.347452	-1.18769	0.318588	-1.06768	0.130267	-0.792261	-0.27926	-0.160649	-0.37751	-0.255127	0.405194	-0.263051	0.0484629	-0.0671028	-0.77708	1.00222	-2.59014	0.131924	0.384438	0.520644	-0.135825	0.306665
192	-1.98539	-5.30341	1.49227	-0.27093	0.806292	-0.402119	-2.56438	6.36409	-0.433478	-0.276292	0.659121	0.497746	-1.71705	-0.869652	-0.848468	2.89605	-1.62307	0.584448	-0.254368	-0.540402	-0.500934	-0.0777957	-0.158881	1.83534	-0.592441	-0.0348067	1.08231	-0.552612	-1.71489	0.361484	-0.949853	0.189704	-0.82788	-0.694313	-0.143979	-0.583539	-0.306186	0.188947	-0.375557	-0.0316657	-0.0403901	-0.91826	1.28799	-2.62631	0.0942268	0.501817	0.49678	-0.201408	0.281187
194	-2.17431	-6.0965	2.14148	-0.600895	1.09656	-0.621569	-3.66887	8.64638	-0.97689	-0.570335	0.852732	0.562484	-2.09683	-0.972217	-1.06619	3.07032	-1.6242	-0.768287	-0.266245	-0.569915	-0.57977	-0.128211	-0.141553	2.20009	-0.730978	-0.0536385	1.50554	-0.756391	-2.25164	0.399723	-0.801345	0.250315	-0.853771	-1.16118	-0.139485	-0.818444	-0.346022	0.0587139	-0.494196	-0.102621	-0.00805844	-1.04673	1.53864	-2.65631	0.0575953	0.64032	0.456492	-0.264299	0.257015
[truncated: 22 more columns]
