# Supplementary material for: Neural activity in cortico-basal ganglia circuits of juvenile songbirds encodes performance during goal-directed learning
Source: eLife journal article supplement (doi:10.7554/elife.26973), 2017-12-19

**Figure 10 Supplement 1.** Examples of syllable renditions with either high or low acoustic similarity to the closest-matching tutor syllable.

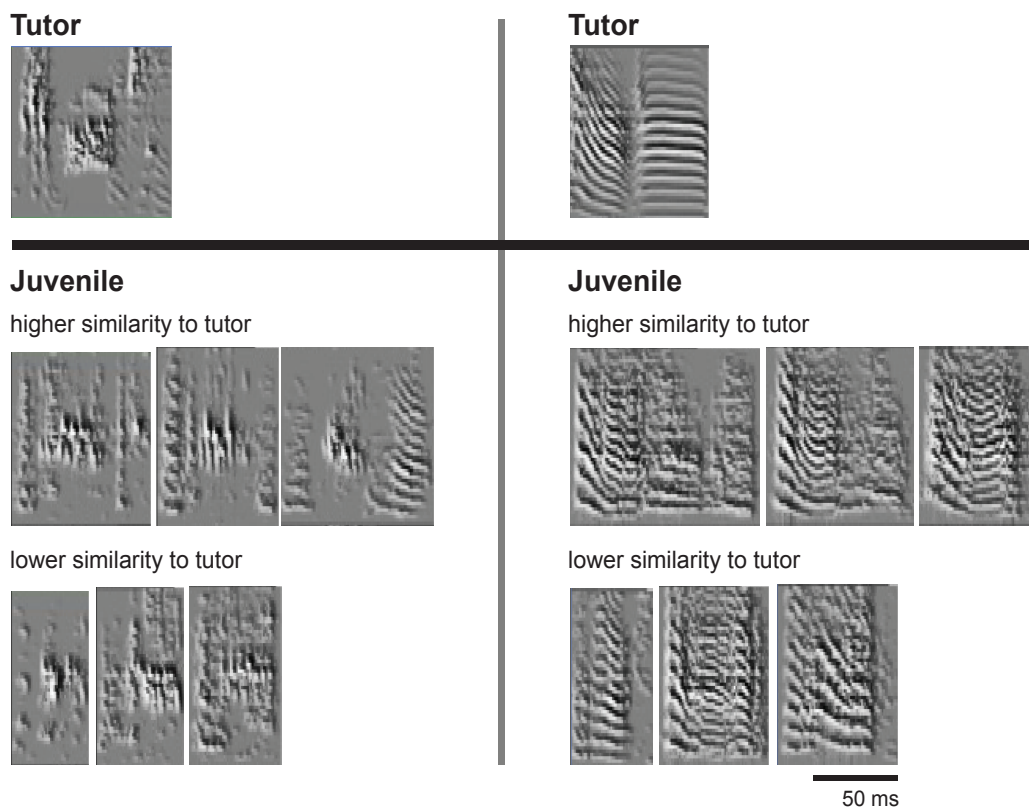

Supplement: supp [file elife-26973-supp-v1.zip › elife_poa_e26973_Figure_10_figure_supplement_1.pdf]
