# Supplementary figures and images for: Neural activity in cortico-basal ganglia circuits of juvenile songbirds encodes performance during goal-directed learning
Source: eLife journal article supplement (doi:10.7554/elife.26973), 2017-12-19

**Figure 2-figure supplement 2.** LMAN neurons had low selectivity for different syllable types.

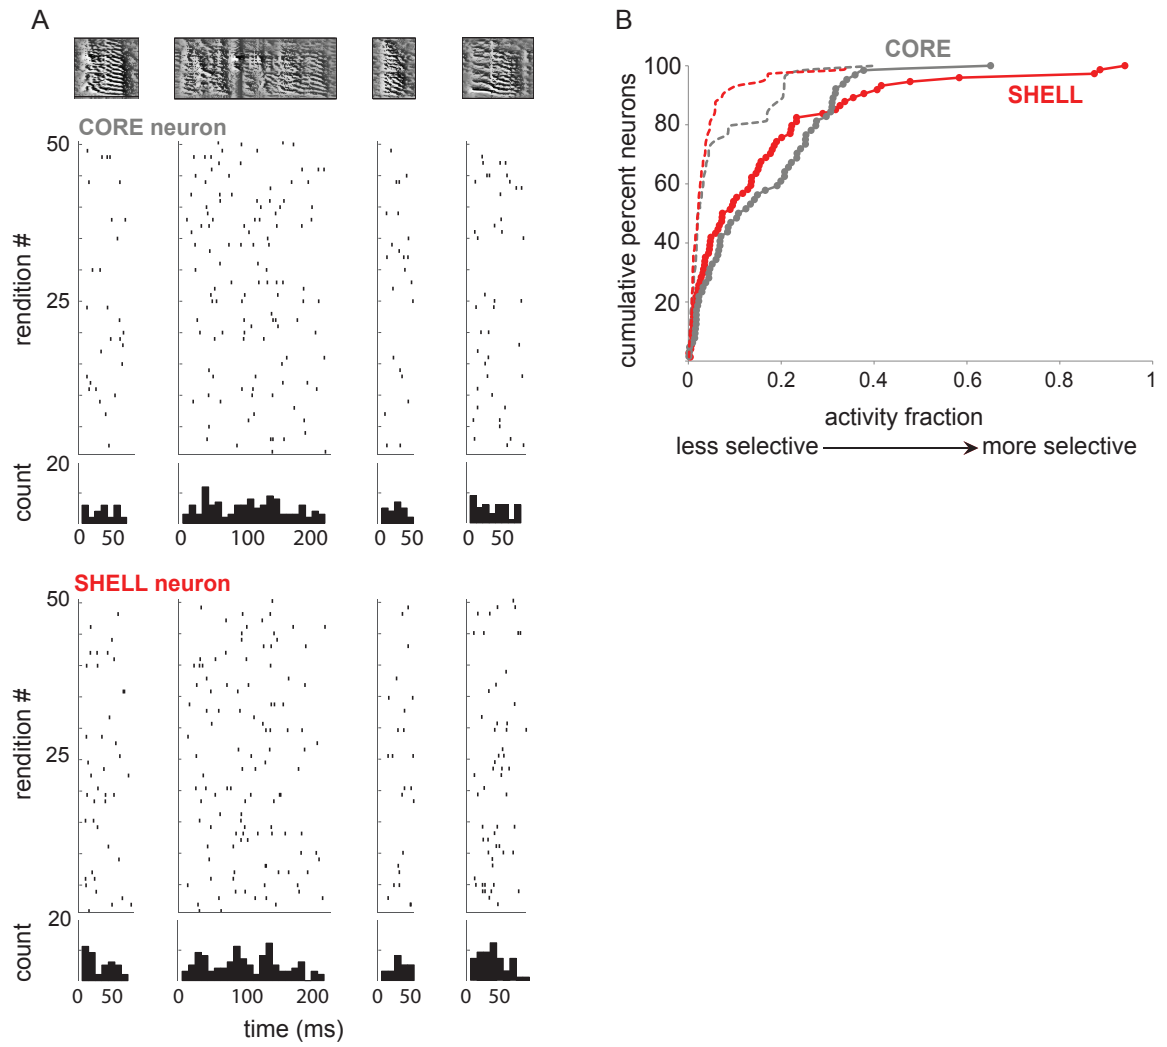

Supplement: supp [file elife-26973-supp-v1.zip › elife_poa_e26973_Figure_2_figure_supplement_2.pdf]

**Figure 1 Supplement 1.**

Lesions of Ald prevent vocal learning in juvenile birds.

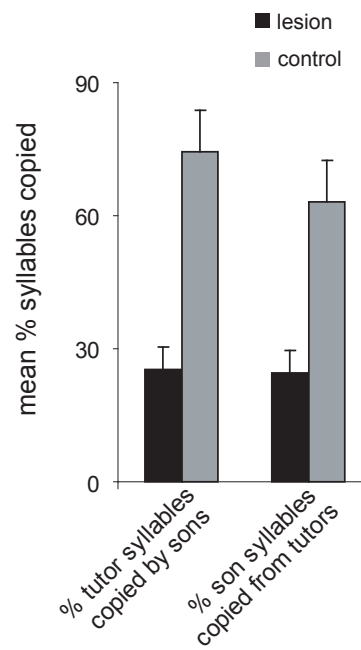

Supplement: supp [file elife-26973-supp-v1.zip › elife_poa_e26973_Figure_1_figure_supplement_1.pdf]

**Figure 7 Supplement 1.** Measuring degree of song development for each day of singing for each bird.

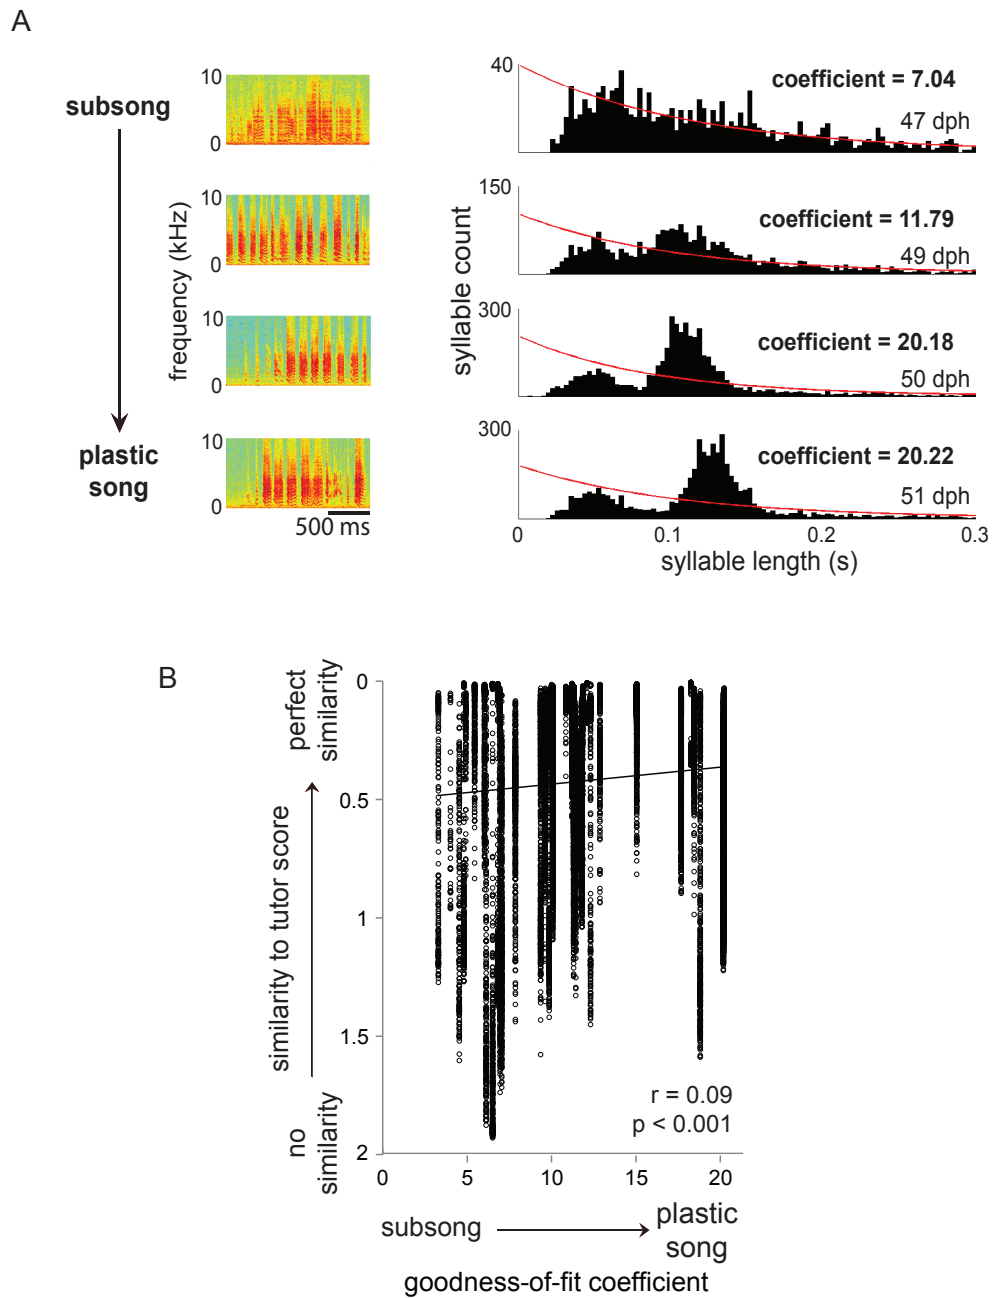

Supplement: supp [file elife-26973-supp-v1.zip › elife_poa_e26973_Figure_7_figure_supplement_1.pdf]
